# Supplementary material for: On the reticular construction concept of covalent organic frameworks
Source: publisher site journal article supplement (doi:10.3762/bjnano.1.8), 2010-11-22
Supplement: Additional file 1 [file 2190-4286-1-8-S1.pdf]

## **Supporting Information**

for

### **On the reticular construction concept of covalent organic frameworks**

Binit Lukose<sup>1</sup>, Agnieszka Kuc<sup>1</sup>, Johannes Frenzel<sup>2</sup>, and Thomas Heine\*<sup>1</sup>

Address: <sup>1</sup>School of Engineering and Science, Jacobs University Bremen, Research III, Room 61, Campus Ring 1, Bremen 28759, Germany and <sup>2</sup>Lehrstuhl für Theoretische Chemie, Ruhr-Universität Bochum, Bochum 44780, Germany

Email: Thomas Heine - t.heine@jacobs-university.de

\* Corresponding author

### **Detailed data of calculated COF parameters**

## Contents

1. Table S1: Bond lengths and angles of studied COFs
2. Figure S2: C-C bond lengths in connectors and linkers
3. Table S3: Cell parameter  $a$  [Å], interlayer distance  $d$  [Å], and mass density  $\rho$  [g·cm<sup>-3</sup>] for serrated and inclined stacked COFs.
4. Table S4: The calculated energies per bond formed between building blocks for serrated and inclined stacked COFs
5. Cartesian coordinates of all simulated COFs

**Table S1:** The calculated bond lengths and angles of all studied COFs. Corresponding experimental values found from the literature are shown in brackets.

| COF       | Building Blocks | C-B           | B-O           | O-C           | ∠OBO                       |
|-----------|-----------------|---------------|---------------|---------------|----------------------------|
| COF-1     | I-a             | 1.498 (1.600) | 1.393 (1.509) |               | 120.3* (120.0)             |
| COF-1M    | I-b             | 1.497         | 1.393         |               | 120.3*                     |
| COF-2M    | I-c             | 1.497         | 1.392         |               | 120.3*                     |
| COF-3M    | I-d             | 1.496         | 1.392         |               | 120.1*                     |
| PPy-COF   | I-e             | 1.498         | 1.393         |               | 120.2* (119.0)             |
| COF-5     | II-a            | 1.496 (1.530) | 1.399 (1.367) | 1.443 (1.384) | 113.5 <sup>†</sup> (113.9) |
| COF-10    | II-b            | 1.495 (1.553) | 1.399 (1.465) | 1.443 (1.385) | 113.5 <sup>†</sup> (112.0) |
| COF-8     | II-c            | 1.495 (1.548) | 1.399 (1.479) | 1.443         | 113.5 <sup>†</sup>         |
| COF-6     | II-d            | 1.496         | 1.399         | 1.443         | 113.5 <sup>†</sup>         |
| TP COF    | II-e            | 1.496 (1.542) | 1.399 (1.396) | 1.444 (1.377) | 113.5 <sup>†</sup> (118.2) |
| COF-4M    | III-a           | 1.496         | 1.398         | 1.449         | 113.5 <sup>†</sup>         |
| COF-5M    | III-b           | 1.496         | 1.398         | 1.449         | 113.6 <sup>†</sup>         |
| COF-6M    | III-c           | 1.496         | 1.399         | 1.451         | 113.4 <sup>†</sup>         |
| COF-7M    | III-d           | 1.496         | 1.398         | 1.449         | 113.6 <sup>†</sup>         |
| TP COF-1M | III-e           | 1.496         | 1.398         | 1.450         | 113.6 <sup>†</sup>         |
| COF-8M    | IV-a            | 1.496         | 1.398         | 1.445         | 113.1 <sup>†</sup>         |
| COF-9M    | IV-b            | 1.495         | 1.398         | 1.444         | 113.1 <sup>†</sup>         |
| COF-10M   | IV-c            | 1.495         | 1.391         | 1.418         | 112.6 <sup>†</sup>         |
| COF-11M   | IV-d            | 1.498         | 1.399         | 1.450         | 113.4 <sup>†</sup>         |
| TP COF-2M | IV-e            | 1.499         | 1.399         | 1.447         | 113.4 <sup>†</sup>         |

\*B<sub>3</sub>O<sub>3</sub> connectivity

<sup>†</sup>C<sub>2</sub>B<sub>2</sub>O connectivity

It should be noted that the bond lengths of experimentally known COF-1 are much larger compared to our optimized bond lengths as well as that of other synthesized COFs.

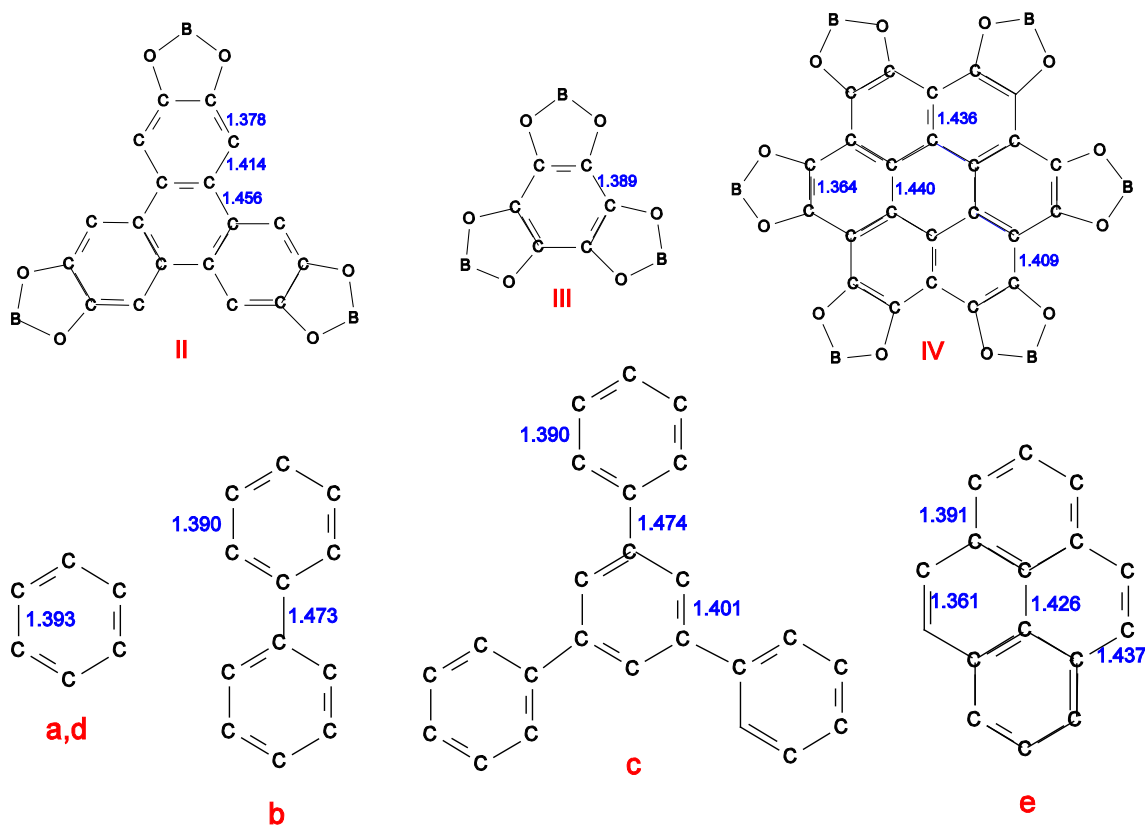

**Figure S2:** Calculated C-C bond lengths in connectors and linkers. Hydrogen atoms are omitted for clarity.

**Table S3:** The calculated unit cell parameters  $a$  [Å], interlayer distance  $d$  [Å] and mass density  $\rho$  [ $\text{g}\cdot\text{cm}^{-3}$ ] for serrated ( $S_a$ : serrated armchair,  $S_z$ : serrated zigzag) and inclined ( $I_a$ : inclined armchair,  $I_z$ : inclined zigzag) stacked COFs.

| COF     | Building Blocks | a     | d     |       |       |       | ρ     |       |       |       |
|---------|-----------------|-------|-------|-------|-------|-------|-------|-------|-------|-------|
|         |                 |       | $S_a$ | $S_z$ | $I_a$ | $I_z$ | $S_a$ | $S_z$ | $I_a$ | $I_z$ |
| COF-1   | I-a             | 15.02 |       | 3.43  |       | 3.43  |       | 0.97  |       | 0.97  |
| COF-1M  | I-b             | 22.41 |       | 3.41  |       | 3.42  |       | 0.69  |       | 0.69  |
| COF-2M  | I-c             | 14.92 |       | 3.40  |       | 3.39  |       | 0.97  |       | 0.97  |
| COF-3M  | I-d             | 07.47 |       | 3.41  |       | 3.42  |       | 1.57  |       | 1.56  |
| PPy-COF | I-e             | 22.32 |       | 3.41  |       | 3.41  |       | 0.86  |       | 0.86  |
| COF-5   | II-a            | 30.14 | 3.42  | 3.42  | 3.41  | 3.40  | 0.57  | 0.57  | 0.58  | 0.58  |
| COF-10  | II-b            | 37.58 | 3.41  | 3.41  | 3.42  | 3.40  | 0.46  | 0.46  | 0.46  | 0.46  |
| COF-8   | II-c            | 22.51 | 3.41  | 3.41  | 3.42  | 3.42  | 0.73  | 0.73  | 0.72  | 0.72  |
| COF-6   | II-d            | 15.05 | 3.42  | 3.41  | 3.40  | 3.40  | 1.05  | 1.06  | 1.06  | 1.06  |
| TP COF  | II-e            | 37.50 | 3.42  | 3.41  | 3.42  | 3.42  | 0.52  | 0.52  | 0.52  | 0.52  |
| COF-4M  | III-a           | 21.71 | 3.44  | 3.44  | 3.45  | 3.44  | 0.74  | 0.74  | 0.74  | 0.74  |
| COF-5M  | III-b           | 29.15 | 3.43  | 3.42  | 3.43  | 3.43  | 0.56  | 0.56  | 0.56  | 0.56  |
| COF-6M  | III-c           | 18.33 | 3.41  | 3.41  | 3.42  | 3.41  | 0.84  | 0.84  | 0.84  | 0.84  |

|                  |              |       |      |      |      |      |      |      |      |      |
|------------------|--------------|-------|------|------|------|------|------|------|------|------|
| <b>COF-7M</b>    | <b>III-d</b> | 10.83 | 3.44 | 3.43 | 3.40 | 3.44 | 1.31 | 1.31 | 1.32 | 1.31 |
| <b>TP COF-1M</b> | <b>III-e</b> | 29.05 | 3.43 | 3.42 | 3.43 | 3.42 | 0.66 | 0.67 | 0.66 | 0.66 |
| <b>COF-8M</b>    | <b>IV-a</b>  | 17.48 | 3.41 | 3.41 | 3.42 | 3.42 | 1.42 | 1.42 | 1.42 | 1.42 |
| <b>COF-9M</b>    | <b>IV-b</b>  | 21.76 | 3.41 | 3.41 | 3.41 | 3.42 | 1.19 | 1.19 | 1.19 | 1.19 |
| <b>COF-10M</b>   | <b>IV-c</b>  | 22.54 | 3.40 | 3.40 | 3.40 | 3.40 | 1.28 | 1.28 | 1.28 | 1.28 |
| <b>COF-11M</b>   | <b>IV-d</b>  | 15.12 | 3.41 | 3.41 | 3.40 | 3.40 | 1.71 | 1.71 | 1.71 | 1.71 |
| <b>TP COF-2M</b> | <b>IV-e</b>  | 21.73 | 3.40 | 3.40 | 3.40 | 3.40 | 1.37 | 1.37 | 1.37 | 1.37 |
| <b>REF-I</b>     | <b>I</b>     | 07.73 |      | 3.49 |      | 3.45 |      | 1.48 |      | 1.5  |
| <b>REF-III</b>   | <b>III</b>   | 14.45 | 3.48 |      | 3.49 |      | 1.06 |      | 1.06 |      |

**Table S4:** The calculated energies [ $\text{kJ}\cdot\text{mol}^{-1}$ ] per bond formed between building blocks for serrated ( $S_a$ : serrated armchair,  $S_z$ : serrated zigzag) and inclined ( $I_a$ : inclined armchair,  $I_z$ : inclined zigzag) stacked COFs:  $E_{c,b}$  is the condensation energy,  $E_{s,b}$  is the stacking energy, and  $E_{f,b}$  is the COF formation energy ( $E_{f,b} = E_{c,b} + E_{s,b}$ ). The calculated band gaps,  $\Delta$  [eV], are given as well.

| COF           | $S_a$     |           |          | $S_z$     |           |          | $I_a$     |           |          | $I_z$     |           |          |
|---------------|-----------|-----------|----------|-----------|-----------|----------|-----------|-----------|----------|-----------|-----------|----------|
|               | $E_{s,b}$ | $E_{f,b}$ | $\Delta$ | $E_{s,b}$ | $E_{f,b}$ | $\Delta$ | $E_{s,b}$ | $E_{f,b}$ | $\Delta$ | $E_{s,b}$ | $E_{f,b}$ | $\Delta$ |
| <b>-1</b>     |           |           |          | -28.10    | -19.04    | 3.6      |           |           |          | -27.86    | -18.80    | 3.6      |
| <b>-1M</b>    |           |           |          | -44.26    | -34.77    | 3.0      |           |           |          | -43.89    | -34.40    | 3.0      |
| <b>-2M</b>    |           |           |          | -59.67    | -50.11    | 3.0      |           |           |          | -58.33    | -48.77    | 3.0      |
| <b>-3M</b>    |           |           |          | -26.67    | -19.04    | 4.0      |           |           |          | -25.91    | -18.28    | 4.0      |
| <b>PPy-</b>   |           |           |          | -59.16    | -50.58    | 2.6      |           |           |          | -58.65    | -50.07    | 2.6      |
| <b>-5</b>     | -30.52    | -28.41    | 2.7      | -30.51    | -28.40    | 2.6      | -32.75    | -30.64    | 2.6      | -32.97    | -30.86    | 2.6      |
| <b>-10</b>    | -38.68    | -35.51    | 2.6      | -38.69    | -35.52    | 2.5      | -38.30    | -35.13    | 2.6      | -42.93    | -39.76    | 2.5      |
| <b>-8</b>     | -46.15    | -43.52    | 2.7      | -46.14    | -43.51    | 2.7      | -45.71    | -43.08    | 2.7      | -45.73    | -43.10    | 2.7      |
| <b>-6</b>     | -29.78    | -27.93    | 3.0      | -29.78    | -27.93    | 3.0      | -31.17    | -29.32    | 3.0      | -30.90    | -29.05    | 3.0      |
| <b>TP</b>     | -45.57    | -43.26    | 2.6      | -45.62    | -43.31    | 2.6      | -45.11    | -42.80    | 2.6      | -45.11    | -42.80    | 2.6      |
| <b>-4M</b>    | -18.11    | -18.44    | 2.8      | -18.13    | -18.46    | 2.8      | -17.69    | -18.02    | 2.8      | -18.80    | -19.13    | 2.8      |
| <b>-5M</b>    | -26.26    | -26.19    | 2.7      | -26.30    | -26.23    | 2.6      | -25.97    | -25.90    | 2.6      | -26.00    | -25.93    | 2.6      |
| <b>-6M</b>    | -33.75    | -33.61    | 2.8      | -33.81    | -33.67    | 2.8      | -34.87    | -34.73    | 2.8      | -33.49    | -33.35    | 2.8      |
| <b>-7M</b>    | -17.24    | -18.94    | 3.2      | -17.26    | -18.96    | 3.1      | -23.33    | -25.03    | 3.2      | -18.66    | -20.36    | 3.1      |
| <b>TP -1M</b> | -33.27    | -33.41    | 2.6      | -33.34    | -33.48    | 2.6      | -33.40    | -33.54    | 2.6      | -33.53    | -33.67    | 2.6      |
| <b>-8M</b>    | -28.97    | -36.84    | 2.1      | -28.95    | -36.82    | 2.1      | -29.71    | -37.58    | 2.1      | -29.83    | -37.70    | 2.1      |
| <b>-9M</b>    | -37.32    | -45.68    | 2.0      | -37.33    | -45.69    | 2.0      | -36.84    | -45.20    | 2.0      | -37.06    | -45.42    | 2.0      |
| <b>-10M</b>   | -45.12    | -54.59    | 2.1      | -45.13    | -54.60    | 2.1      | -44.91    | -54.38    | 2.1      | -44.95    | -54.42    | 2.1      |
| <b>-11M</b>   | -28.31    | -32.34    | 2.4      | -28.34    | -32.37    | 2.4      | -28.16    | -32.19    | 2.4      | -28.30    | -32.33    | 2.4      |
| <b>TP -2M</b> | -45.00    | -44.70    | 2.0      | -45.05    | -44.75    | 2.0      | -44.95    | -44.65    | 2.0      | -44.96    | -44.66    | 2.0      |

# Cartesian coordinates of COF structures

## COF-1

### Layer I AA, AB, inclined zigzag, and serrated zigzag

|   |           |           |          |   |           |           |          |
|---|-----------|-----------|----------|---|-----------|-----------|----------|
| C | 9.619348  | 10.595180 | 0.794835 | O | 7.077028  | 12.043170 | 0.794935 |
| C | 9.578448  | 12.001080 | 0.795055 | B | 20.837220 | 12.738170 | 0.794775 |
| C | 10.816200 | 12.669210 | 0.795125 | O | 13.344850 | 1.168948  | 0.794905 |
| C | 12.018110 | 11.975350 | 0.794975 | C | 19.541290 | 11.986090 | 0.794485 |
| C | 12.058630 | 10.569420 | 0.794755 | C | 19.501730 | 10.580210 | 0.794805 |
| C | 10.821120 | 9.901537  | 0.794675 | C | 18.300440 | 9.885317  | 0.794835 |
| B | 13.354240 | 9.816797  | 0.794755 | C | 17.062330 | 10.552590 | 0.794485 |
| O | 14.561420 | 10.511340 | 0.794555 | C | 17.101900 | 11.958400 | 0.794135 |
| B | 15.762870 | 9.806707  | 0.794585 | C | 18.303200 | 12.653190 | 0.794105 |
| O | 15.760730 | 8.414117  | 0.794805 | H | 10.802260 | 0.793766  | 0.793905 |
| B | 14.549710 | 7.726126  | 0.794905 | H | 16.154750 | 12.522810 | 0.793925 |
| O | 13.344650 | 8.424098  | 0.794875 | H | 20.448893 | 10.015360 | 0.795205 |
| C | 14.545390 | 6.227821  | 0.795005 | H | 18.317090 | 8.782715  | 0.795225 |
| C | 15.742780 | 5.490328  | 0.795455 | H | 16.706014 | 3.565474  | 0.795925 |
| C | 15.743230 | 4.102874  | 0.795535 | H | 16.705240 | 6.028351  | 0.795805 |
| C | 14.546280 | 3.364655  | 0.795125 | H | 12.385610 | 3.564683  | 0.794525 |
| C | 13.348490 | 4.102057  | 0.794755 | H | 12.384980 | 6.026808  | 0.794405 |
| C | 13.348090 | 5.489797  | 0.794675 | H | 12.964940 | 12.540800 | 0.795055 |
| B | 14.550290 | 1.866363  | 0.795105 | H | 3.348885  | 0.809891  | 0.795325 |
| O | 0.793766  | 1.177789  | 0.795225 | H | 10.805050 | 8.798943  | 0.794505 |
| B | 8.279047  | 12.747040 | 0.795055 | H | 8.672658  | 10.029870 | 0.794755 |

### Transformation Matrix

|          |           |           |          |                          |
|----------|-----------|-----------|----------|--------------------------|
| <b>a</b> | 14.967120 | 0.000000  | 0.000000 |                          |
| <b>b</b> | 7.483560  | 12.961900 | 0.000000 |                          |
| <b>c</b> | 0.000000  | 0.000000  | 3.505888 | AA stacking              |
| <b>c</b> | 1.204480  | 0.695407  | 3.432429 | Inclined zigzag stacking |

### Layer II AB stacking

|   |          |          |          |   |          |          |          |
|---|----------|----------|----------|---|----------|----------|----------|
| C | 17.10291 | 14.91582 | 3.922080 | O | 14.56059 | 16.36381 | 3.922180 |
| C | 17.06201 | 16.32171 | 3.922300 | B | 28.32078 | 17.05881 | 3.922020 |
| C | 18.29976 | 16.98985 | 3.922370 | O | 20.82841 | 5.489583 | 3.922150 |
| C | 19.50167 | 16.29599 | 3.922220 | C | 27.02485 | 16.30672 | 3.921730 |
| C | 19.54219 | 14.89005 | 3.922000 | C | 26.98529 | 14.90084 | 3.922050 |
| C | 18.30468 | 14.22217 | 3.921920 | C | 25.78400 | 14.20595 | 3.922080 |
| B | 20.83780 | 14.13743 | 3.922000 | C | 24.54589 | 14.87323 | 3.921730 |
| O | 22.04498 | 14.83198 | 3.921800 | C | 24.58546 | 16.27904 | 3.921380 |
| B | 23.24643 | 14.12734 | 3.921830 | C | 25.78676 | 16.97383 | 3.921350 |
| O | 23.24429 | 12.73475 | 3.922050 | H | 18.28582 | 5.114401 | 3.921150 |
| B | 22.03327 | 12.04676 | 3.922150 | H | 23.63831 | 16.84344 | 3.921170 |
| O | 20.82821 | 12.74473 | 3.922120 | H | 27.93245 | 14.33599 | 3.922450 |
| C | 22.02895 | 10.54846 | 3.922250 | H | 25.80065 | 13.10335 | 3.922470 |
| C | 23.22634 | 9.810963 | 3.922700 | H | 24.18958 | 7.886109 | 3.923170 |
| C | 23.22679 | 8.423510 | 3.922780 | H | 24.18880 | 10.34899 | 3.923050 |
| C | 22.02984 | 7.685290 | 3.922370 | H | 19.86917 | 7.885318 | 3.921770 |
| C | 20.83205 | 8.422692 | 3.922000 | H | 19.86854 | 10.34744 | 3.921650 |
| C | 20.83165 | 9.810432 | 3.921920 | H | 20.44850 | 16.86143 | 3.922300 |

|   |          |          |          |             |          |          |          |
|---|----------|----------|----------|-------------|----------|----------|----------|
| B | 22.03385 | 6.186998 | 3.922350 | H           | 10.83245 | 5.130527 | 3.922570 |
| O | 8.277327 | 5.498425 | 3.922470 | H           | 18.28861 | 13.11958 | 3.921750 |
| B | 15.76261 | 17.06767 | 3.922300 | H           | 16.15622 | 14.35051 | 3.922000 |
| c | 0.00000  | 0.00000  | 6.25449  | AB stacking |          |          |          |

### Layer II serrated zigzag

|   |          |          |         |                          |          |          |          |
|---|----------|----------|---------|--------------------------|----------|----------|----------|
| C | 10.82383 | 11.29059 | 4.22064 | O                        | 8.28151  | 12.73858 | 4.220743 |
| C | 10.78293 | 12.69649 | 4.22086 | B                        | 14.55814 | 0.47168  | 4.220583 |
| C | 4.53712  | 0.40272  | 4.22093 | O                        | 14.54933 | 1.86436  | 4.220713 |
| C | 13.22259 | 12.67076 | 4.22078 | C                        | 20.74577 | 12.68150 | 4.220293 |
| C | 13.26311 | 11.26483 | 4.22056 | C                        | 20.70621 | 11.27562 | 4.220613 |
| C | 12.02560 | 10.59694 | 4.22048 | C                        | 19.50492 | 10.58072 | 4.220643 |
| B | 14.55872 | 10.51220 | 4.22056 | C                        | 18.26681 | 11.24800 | 4.220293 |
| O | 15.76590 | 11.20675 | 4.22036 | C                        | 18.30638 | 12.65381 | 4.219943 |
| B | 16.96735 | 10.50211 | 4.22039 | C                        | 12.02412 | 0.38670  | 4.219913 |
| O | 16.96521 | 9.109524 | 4.22061 | H                        | 12.00674 | 1.48917  | 4.219713 |
| B | 15.75419 | 8.421534 | 4.22071 | H                        | 9.87567  | 0.25632  | 4.219733 |
| O | 14.54913 | 9.119505 | 4.22068 | H                        | 6.68625  | 10.71077 | 4.221013 |
| C | 15.74987 | 6.923228 | 4.22081 | H                        | 19.52157 | 9.47812  | 4.221033 |
| C | 16.94726 | 6.185735 | 4.22126 | H                        | 2.94337  | 4.26088  | 4.221733 |
| C | 16.94771 | 4.798281 | 4.22134 | H                        | 17.90972 | 6.72376  | 4.221613 |
| C | 15.75076 | 4.060062 | 4.22093 | H                        | 13.59009 | 4.26009  | 4.220333 |
| C | 14.55297 | 4.797464 | 4.22056 | H                        | 13.58946 | 6.72222  | 4.220213 |
| C | 14.55257 | 6.185204 | 4.22048 | H                        | 6.68586  | 0.27431  | 4.220863 |
| B | 15.75477 | 2.561770 | 4.22091 | H                        | 4.55336  | 1.50530  | 4.221133 |
| O | 1.99824  | 1.873196 | 4.22103 | H                        | 12.00953 | 9.49435  | 4.220313 |
| B | 1.99996  | 0.480550 | 4.22086 | H                        | 9.87713  | 10.72528 | 4.220563 |
| c | 0.00000  | 0.00000  | 6.85162 | serrated zigzag stacking |          |          |          |

## COF-1M

### Layer 1 AA, AB, inclined zigzag, and serrated zigzag

|   |           |           |          |   |           |           |          |
|---|-----------|-----------|----------|---|-----------|-----------|----------|
| C | 13.308650 | 18.473020 | 0.793916 | C | 30.716500 | 18.434470 | 0.793956 |
| C | 13.353690 | 17.065480 | 0.793986 | C | 29.475080 | 19.099230 | 0.794056 |
| C | 14.555950 | 16.375820 | 0.794016 | C | 28.276480 | 18.403170 | 0.794086 |
| C | 15.780570 | 17.061520 | 0.793986 | C | 28.257560 | 16.999700 | 0.794016 |
| C | 15.750000 | 18.464710 | 0.793916 | C | 29.488090 | 16.324470 | 0.793886 |
| C | 14.544160 | 19.149250 | 0.793886 | C | 30.683890 | 17.026430 | 0.793856 |
| C | 17.052200 | 16.327260 | 0.794016 | C | 26.985690 | 16.265890 | 0.794036 |
| C | 17.070910 | 14.923690 | 0.793956 | C | 25.761130 | 16.951880 | 0.794016 |
| C | 18.269480 | 14.227490 | 0.793986 | C | 24.558700 | 16.262460 | 0.794036 |
| C | 19.510870 | 14.892130 | 0.794086 | C | 24.513430 | 14.854960 | 0.794086 |
| C | 19.478510 | 16.300090 | 0.794156 | C | 25.748740 | 14.178540 | 0.794116 |
| C | 18.282860 | 17.002340 | 0.794116 | C | 26.954810 | 14.862670 | 0.794086 |
| B | 20.802320 | 14.134430 | 0.794116 | H | 29.494620 | 15.220760 | 0.793836 |
| O | 22.012470 | 14.824880 | 0.794116 | H | 31.634540 | 16.467970 | 0.793766 |
| B | 23.211630 | 14.115310 | 0.794086 | H | 18.251610 | 0.7937660 | 0.794136 |
| O | 23.204290 | 12.722200 | 0.794056 | H | 27.317800 | 18.950490 | 0.794186 |
| B | 21.990370 | 12.038150 | 0.794056 | H | 25.756300 | 13.076080 | 0.794156 |
| O | 20.787410 | 12.741060 | 0.794086 | H | 27.907290 | 14.304970 | 0.794116 |
| C | 21.982510 | 10.540880 | 0.794056 | H | 25.767000 | 18.055760 | 0.793956 |
| C | 20.781510 | 9.8055030 | 0.794186 | H | 23.613390 | 16.829830 | 0.794016 |

|   |           |           |          |   |           |           |          |
|---|-----------|-----------|----------|---|-----------|-----------|----------|
| C | 20.775990 | 8.4189450 | 0.794216 | H | 24.137390 | 7.8620570 | 0.793916 |
| C | 21.977800 | 7.6939080 | 0.794116 | H | 24.143150 | 10.339540 | 0.793856 |
| C | 23.181970 | 8.4150640 | 0.793986 | H | 19.820850 | 10.346510 | 0.794286 |
| C | 23.180960 | 9.8012530 | 0.793956 | H | 19.818810 | 7.8691800 | 0.794286 |
| C | 21.977530 | 6.2254730 | 0.794116 | H | 24.142280 | 3.5794100 | 0.794116 |
| C | 20.775510 | 5.5006680 | 0.794086 | H | 24.137150 | 6.0568960 | 0.794136 |
| C | 20.780750 | 4.1141150 | 0.794056 | H | 19.818420 | 6.0505690 | 0.794086 |
| C | 21.981650 | 3.3785580 | 0.794056 | H | 19.819910 | 3.5732960 | 0.794036 |
| C | 23.180230 | 4.1179380 | 0.794116 | H | 16.702580 | 19.022280 | 0.793886 |
| C | 23.181600 | 5.5041230 | 0.794116 | H | 3.3468080 | 0.8438770 | 0.793806 |
| B | 21.989840 | 1.8812640 | 0.794016 | H | 12.408250 | 16.498420 | 0.794016 |
| O | 0.7937660 | 1.1976820 | 0.793986 | H | 14.561560 | 15.271920 | 0.794056 |
| B | 12.006670 | 19.212400 | 0.793936 | H | 20.429200 | 16.858450 | 0.794236 |
| O | 10.807840 | 18.502380 | 0.793886 | H | 18.289510 | 18.105990 | 0.794156 |
| B | 32.007720 | 19.192370 | 0.793956 | H | 16.112210 | 14.376520 | 0.793886 |
| O | 20.787130 | 1.1779250 | 0.794016 | H | 18.250840 | 13.125110 | 0.793936 |

Transformation Matrix

|          |           |           |          |                 |
|----------|-----------|-----------|----------|-----------------|
| <b>a</b> | 22.410240 | 0.000000  | 0.000000 |                 |
| <b>b</b> | 11.205120 | 19.407830 | 0.000000 |                 |
| <b>c</b> | 0.000000  | 0.000000  | 3.490500 | AA              |
| <b>c</b> | 1.199740  | 0.692670  | 3.41658  | inclined zigzag |

**Layer II AB stacking**

|   |          |          |          |   |          |          |          |
|---|----------|----------|----------|---|----------|----------|----------|
| C | 24.51377 | 24.94230 | 3.830658 | C | 41.92162 | 24.90375 | 3.830698 |
| C | 24.55881 | 23.53476 | 3.830728 | C | 40.68020 | 25.56851 | 3.830798 |
| C | 25.76107 | 22.84510 | 3.830758 | C | 39.48160 | 24.87245 | 3.830828 |
| C | 26.98569 | 23.53080 | 3.830728 | C | 39.46268 | 23.46898 | 3.830758 |
| C | 26.95512 | 24.93399 | 3.830658 | C | 40.69321 | 22.79375 | 3.830628 |
| C | 25.74928 | 25.61853 | 3.830628 | C | 41.88901 | 23.49571 | 3.830598 |
| C | 28.25732 | 22.79654 | 3.830758 | C | 38.19081 | 22.73517 | 3.830778 |
| C | 28.27603 | 21.39297 | 3.830698 | C | 36.96625 | 23.42116 | 3.830758 |
| C | 29.47460 | 20.69677 | 3.830728 | C | 35.76382 | 22.73174 | 3.830778 |
| C | 30.71599 | 21.36141 | 3.830828 | C | 35.71855 | 21.32424 | 3.830828 |
| C | 30.68363 | 22.76937 | 3.830898 | C | 36.95386 | 20.64782 | 3.830858 |
| C | 29.48798 | 23.47162 | 3.830858 | C | 38.15993 | 21.33195 | 3.830828 |
| B | 32.00744 | 20.60371 | 3.830858 | H | 40.69974 | 21.69004 | 3.830578 |
| O | 33.21759 | 21.29416 | 3.830858 | H | 42.83966 | 22.93725 | 3.830508 |
| B | 34.41675 | 20.58459 | 3.830828 | H | 29.45673 | 7.263045 | 3.830878 |
| O | 34.40941 | 19.19148 | 3.830798 | H | 38.52292 | 25.41977 | 3.830928 |
| B | 33.19549 | 18.50743 | 3.830798 | H | 36.96142 | 19.54536 | 3.830898 |
| O | 31.99253 | 19.21034 | 3.830828 | H | 39.11241 | 20.77425 | 3.830858 |
| C | 33.18763 | 17.01016 | 3.830798 | H | 36.97212 | 24.52504 | 3.830698 |
| C | 31.98663 | 16.27478 | 3.830928 | H | 34.81851 | 23.29911 | 3.830758 |
| C | 31.98111 | 14.88822 | 3.830958 | H | 35.34251 | 14.33134 | 3.830658 |
| C | 33.18292 | 14.16319 | 3.830858 | H | 35.34827 | 16.80882 | 3.830598 |
| C | 34.38709 | 14.88434 | 3.830728 | H | 31.02597 | 16.81579 | 3.831028 |
| C | 34.38608 | 16.27053 | 3.830698 | H | 31.02393 | 14.33846 | 3.831028 |
| C | 33.18265 | 12.69475 | 3.830858 | H | 35.34740 | 10.04869 | 3.830858 |
| C | 31.98063 | 11.96995 | 3.830828 | H | 35.34227 | 12.52618 | 3.830878 |
| C | 31.98587 | 10.58340 | 3.830798 | H | 31.02354 | 12.51985 | 3.830828 |
| C | 33.18677 | 9.847837 | 3.830798 | H | 31.02503 | 10.04258 | 3.830778 |
| C | 34.38535 | 10.58722 | 3.830858 | H | 27.90770 | 25.49156 | 3.830628 |
| C | 34.38672 | 11.97340 | 3.830858 | H | 14.55193 | 7.313156 | 3.830548 |
| B | 33.19496 | 8.350543 | 3.830758 | H | 23.61337 | 22.96770 | 3.830758 |
| O | 11.99889 | 7.666961 | 3.830728 | H | 25.76668 | 21.74120 | 3.830798 |
| B | 23.21179 | 25.68168 | 3.830678 | H | 31.63432 | 23.32773 | 3.830978 |

|   |          |          |          |    |          |          |          |
|---|----------|----------|----------|----|----------|----------|----------|
| O | 22.01296 | 24.97166 | 3.830628 | H  | 29.49463 | 24.57527 | 3.830898 |
| B | 43.21284 | 25.66165 | 3.830698 | H  | 27.31733 | 20.84580 | 3.830628 |
| O | 31.99225 | 7.647204 | 3.830758 | H  | 29.45596 | 19.59439 | 3.830678 |
| c | 0.00000  | 0.00000  | 6.073485 | AB |          |          |          |

**Layer II serrated zigzag**

|   |          |           |          |                 |          |           |          |
|---|----------|-----------|----------|-----------------|----------|-----------|----------|
| C | 14.50839 | 19.165690 | 4.207076 | C               | 31.91624 | 19.127140 | 4.207116 |
| C | 14.55343 | 17.758150 | 4.207146 | C               | 19.46970 | 0.384070  | 4.207216 |
| C | 15.75569 | 17.068490 | 4.207176 | C               | 29.47622 | 19.095840 | 4.207246 |
| C | 16.98031 | 17.754190 | 4.207146 | C               | 29.45730 | 17.692370 | 4.207176 |
| C | 16.94974 | 19.157380 | 4.207076 | C               | 30.68783 | 17.017140 | 4.207046 |
| C | 4.53878  | 0.434090  | 4.207046 | C               | 31.88363 | 17.719100 | 4.207016 |
| C | 18.25194 | 17.019930 | 4.207176 | C               | 28.18543 | 16.958560 | 4.207196 |
| C | 18.27065 | 15.616360 | 4.207116 | C               | 26.96087 | 17.644550 | 4.207176 |
| C | 19.46922 | 14.920160 | 4.207146 | C               | 25.75844 | 16.955130 | 4.207196 |
| C | 20.71061 | 15.584800 | 4.207246 | C               | 25.71317 | 15.547630 | 4.207246 |
| C | 20.67825 | 16.992760 | 4.207316 | C               | 26.94848 | 14.871210 | 4.207276 |
| C | 19.48260 | 17.695010 | 4.207276 | C               | 28.15455 | 15.555340 | 4.207246 |
| B | 22.00206 | 14.827100 | 4.207276 | H               | 30.69436 | 15.913430 | 4.206996 |
| O | 23.21221 | 15.517550 | 4.207276 | H               | 10.42404 | 17.160640 | 4.206926 |
| B | 24.41137 | 14.807980 | 4.207246 | H               | 19.45135 | 1.486436  | 4.207296 |
| O | 24.40403 | 13.414870 | 4.207216 | H               | 17.31242 | 0.235330  | 4.207346 |
| B | 23.19011 | 12.730820 | 4.207216 | H               | 26.95604 | 13.768750 | 4.207316 |
| O | 21.98715 | 13.433730 | 4.207246 | H               | 29.10703 | 14.997640 | 4.207276 |
| C | 23.18225 | 11.233550 | 4.207216 | H               | 26.96674 | 18.748430 | 4.207116 |
| C | 21.98125 | 10.498170 | 4.207346 | H               | 24.81313 | 17.522500 | 4.207176 |
| C | 21.97573 | 9.111615  | 4.207376 | H               | 25.33713 | 8.554728  | 4.207076 |
| C | 23.17754 | 8.386579  | 4.207276 | H               | 25.34289 | 11.032210 | 4.207016 |
| C | 24.38171 | 9.107734  | 4.207146 | H               | 21.02059 | 11.039180 | 4.207446 |
| C | 24.38070 | 10.493920 | 4.207116 | H               | 21.01855 | 8.561851  | 4.207446 |
| C | 23.17727 | 6.918143  | 4.207276 | H               | 2.93178  | 4.272080  | 4.207276 |
| C | 21.97525 | 6.193338  | 4.207246 | H               | 25.33689 | 6.749566  | 4.207296 |
| C | 21.98049 | 4.806785  | 4.207216 | H               | 21.01816 | 6.743239  | 4.207246 |
| C | 23.18139 | 4.071228  | 4.207216 | H               | 21.01965 | 4.265966  | 4.207196 |
| C | 24.37997 | 4.810608  | 4.207276 | H               | 6.69720  | 0.307120  | 4.207046 |
| C | 24.38134 | 6.196793  | 4.207276 | H               | 4.54654  | 1.536547  | 4.206966 |
| B | 23.18958 | 2.573934  | 4.207176 | H               | 13.60799 | 17.191090 | 4.207176 |
| O | 1.99350  | 1.890352  | 4.207146 | H               | 15.76130 | 15.964590 | 4.207216 |
| B | 2.00129  | 0.497240  | 4.207096 | H               | 21.62894 | 17.551120 | 4.207396 |
| O | 12.00758 | 19.195050 | 4.207046 | H               | 19.48925 | 18.798660 | 4.207316 |
| B | 22.00234 | 0.477210  | 4.207116 | H               | 17.31195 | 15.069190 | 4.207046 |
| O | 21.98687 | 1.870595  | 4.207176 | H               | 19.45058 | 13.817780 | 4.207096 |
| c | 0.00000  | 0.00000   | 6.82632  | serrated zigzag |          |           |          |

**COF-2M**

**Layer I AA, AB, inclined zigzag, and serrated zigzag**

|   |          |          |           |   |          |          |           |
|---|----------|----------|-----------|---|----------|----------|-----------|
| C | 11.63233 | 6.210753 | 0.7964430 | C | 15.34072 | 12.66828 | 0.7999130 |
| C | 11.65635 | 7.613939 | 0.7969330 | B | 6.679040 | 3.364680 | 0.7965130 |
| C | 10.42911 | 8.294092 | 0.7959630 | O | 5.473729 | 4.063492 | 0.7958130 |
| C | 9.230199 | 7.598482 | 0.7947130 | B | 5.483906 | 5.456936 | 0.7949830 |



|   |          |          |           |   |          |          |           |
|---|----------|----------|-----------|---|----------|----------|-----------|
| C | 9.191589 | 6.190721 | 0.7944630 | O | 6.691520 | 6.151705 | 0.7942130 |
| C | 10.43006 | 5.520183 | 0.7952130 | B | 7.892957 | 5.445951 | 0.7944430 |
| C | 12.92817 | 8.352868 | 0.7981430 | O | 7.890639 | 4.052802 | 0.7953330 |
| C | 12.94053 | 9.753651 | 0.7989330 | H | 15.71660 | 5.673431 | 0.7978830 |
| C | 14.14200 | 10.47344 | 0.7995930 | H | 5.097457 | 8.180507 | 0.7954630 |
| C | 15.34868 | 9.762103 | 0.7995430 | H | 2.940189 | 4.434942 | 0.7955330 |
| C | 15.37087 | 8.361876 | 0.7987630 | H | 4.513570 | 1.667730 | 0.7984630 |
| C | 14.15196 | 7.672185 | 0.7981130 | H | 11.97939 | 12.11415 | 0.7994830 |
| C | 16.64636 | 7.629460 | 0.7979830 | H | 16.29746 | 12.11740 | 0.8004930 |
| C | 16.67207 | 6.226597 | 0.7973630 | H | 8.836130 | 1.671500 | 0.7994130 |
| C | 17.87467 | 5.537436 | 0.7961330 | H | 8.281958 | 8.161122 | 0.7939330 |
| C | 4.189492 | 6.208918 | 0.7954930 | H | 12.58784 | 5.657948 | 0.7971830 |
| C | 19.07268 | 7.616718 | 0.7960630 | H | 10.42946 | 9.397904 | 0.7962930 |
| C | 17.87288 | 8.311345 | 0.7973630 | H | 11.98042 | 10.30233 | 0.7988130 |
| C | 14.13856 | 11.94442 | 0.7997130 | H | 16.30454 | 10.31815 | 0.7999130 |
| C | 12.93522 | 12.66636 | 0.7993630 | H | 14.15703 | 6.566486 | 0.7973130 |
| C | 5.475680 | 1.129270 | 0.7987630 | H | 10.44329 | 4.417712 | 0.7948630 |
| C | 6.675010 | 1.867690 | 0.7983630 | H | 17.87189 | 9.415222 | 0.7978830 |
| C | 7.875200 | 1.130860 | 0.7992630 |   |          |          |           |

Transformation matrix

|          |           |           |          |                 |
|----------|-----------|-----------|----------|-----------------|
| <b>a</b> | 14.922830 | 0.000000  | 0.000000 |                 |
| <b>b</b> | 7.461410  | 12.923540 | 0.000000 |                 |
| <b>c</b> | 0.000000  | 0.000000  | 3.474490 | AA              |
| <b>c</b> | 1.221360  | 0.705152  | 3.392639 | inclined zigzag |

### Layer II AB stacking

|          |          |          |          |    |          |          |          |
|----------|----------|----------|----------|----|----------|----------|----------|
| C        | 19.09374 | 10.51860 | 3.913061 | C  | 22.80214 | 16.97613 | 3.916531 |
| C        | 19.11777 | 11.92179 | 3.913551 | B  | 14.14046 | 7.672530 | 3.913131 |
| C        | 17.89052 | 12.60194 | 3.912581 | O  | 12.93514 | 8.371342 | 3.912431 |
| C        | 16.69161 | 11.90633 | 3.911331 | B  | 12.94532 | 9.764786 | 3.911601 |
| C        | 16.65300 | 10.49857 | 3.911081 | O  | 14.15294 | 10.45955 | 3.910831 |
| C        | 17.89148 | 9.828033 | 3.911831 | B  | 15.35437 | 9.753801 | 3.911061 |
| C        | 20.38959 | 12.66072 | 3.914761 | O  | 15.35205 | 8.360652 | 3.911951 |
| C        | 20.40195 | 14.06150 | 3.915551 | H  | 23.17801 | 9.981281 | 3.914501 |
| C        | 21.60341 | 14.78129 | 3.916211 | H  | 12.55887 | 12.48836 | 3.912081 |
| C        | 22.81009 | 14.06995 | 3.916161 | H  | 10.40160 | 8.742792 | 3.912151 |
| C        | 22.83228 | 12.66973 | 3.915381 | H  | 11.97499 | 5.975580 | 3.915081 |
| C        | 21.61337 | 11.98003 | 3.914731 | H  | 19.44081 | 16.42200 | 3.916101 |
| C        | 24.10777 | 11.93731 | 3.914601 | H  | 23.75887 | 16.42525 | 3.917111 |
| C        | 24.13348 | 10.53445 | 3.913981 | H  | 16.29754 | 5.979350 | 3.916031 |
| C        | 25.33608 | 9.845285 | 3.912751 | H  | 15.74337 | 12.46897 | 3.910551 |
| C        | 11.65091 | 10.51677 | 3.912111 | H  | 20.04926 | 9.965797 | 3.913801 |
| C        | 26.53409 | 11.92457 | 3.912681 | H  | 17.89087 | 13.70575 | 3.912911 |
| C        | 25.33429 | 12.61919 | 3.913981 | H  | 19.44184 | 14.61018 | 3.915431 |
| C        | 21.59998 | 16.25227 | 3.916331 | H  | 23.76595 | 14.62600 | 3.916531 |
| C        | 20.39664 | 16.97421 | 3.915981 | H  | 21.61844 | 10.87434 | 3.913931 |
| C        | 12.93709 | 5.437120 | 3.915381 | H  | 17.90471 | 8.725562 | 3.911481 |
| C        | 14.13643 | 6.175540 | 3.914981 | H  | 25.33331 | 13.72307 | 3.914501 |
| C        | 15.33661 | 5.438710 | 3.915881 |    |          |          |          |
| <b>c</b> | 0.00000  | 0.00000  | 6.23324  | AB |          |          |          |

### Layer II serrated zigzag

|   |          |          |          |   |         |          |          |
|---|----------|----------|----------|---|---------|----------|----------|
| C | 12.85369 | 6.915905 | 4.192503 | C | 9.10067 | 0.449890 | 4.195973 |
| C | 12.87771 | 8.319091 | 4.192993 | B | 7.90040 | 4.069832 | 4.192573 |
| C | 11.65047 | 8.999244 | 4.192023 | O | 6.69509 | 4.768644 | 4.191873 |

|   |          |           |          |   |          |           |                 |
|---|----------|-----------|----------|---|----------|-----------|-----------------|
| C | 10.45156 | 8.303634  | 4.190773 | B | 6.70527  | 6.162088  | 4.191043        |
| C | 10.41295 | 6.895873  | 4.190523 | O | 7.91288  | 6.856857  | 4.190273        |
| C | 11.65142 | 6.225335  | 4.191273 | B | 9.11432  | 6.151103  | 4.190503        |
| C | 14.14953 | 9.058020  | 4.194203 | O | 9.11199  | 4.757954  | 4.191393        |
| C | 14.16189 | 10.458800 | 4.194993 | H | 16.93796 | 6.378583  | 4.193943        |
| C | 15.36336 | 11.178590 | 4.195653 | H | 6.31882  | 8.885658  | 4.191523        |
| C | 16.57004 | 10.467250 | 4.195603 | H | 4.16155  | 5.140094  | 4.191593        |
| C | 16.59223 | 9.067027  | 4.194823 | H | 5.73493  | 2.372882  | 4.194523        |
| C | 15.37332 | 8.377337  | 4.194173 | H | 13.20075 | 12.819300 | 4.195543        |
| C | 17.86772 | 8.334612  | 4.194043 | H | 17.51882 | 12.822550 | 4.196553        |
| C | 17.89343 | 6.931749  | 4.193423 | H | 10.05749 | 2.376652  | 4.195473        |
| C | 4.17320  | 6.242588  | 4.192193 | H | 9.50332  | 8.866274  | 4.189993        |
| C | 5.41085  | 6.914070  | 4.191553 | H | 13.80920 | 6.363100  | 4.193243        |
| C | 5.37121  | 8.321870  | 4.192123 | H | 11.65082 | 10.103060 | 4.192353        |
| C | 19.09424 | 9.016497  | 4.193423 | H | 13.20178 | 11.007480 | 4.194873        |
| C | 15.35992 | 12.649570 | 4.195773 | H | 17.52590 | 11.023300 | 4.195973        |
| C | 6.69517  | 0.447970  | 4.195423 | H | 15.37839 | 7.271638  | 4.193373        |
| C | 6.69704  | 1.834422  | 4.194823 | H | 11.66465 | 5.122864  | 4.190923        |
| C | 7.89637  | 2.572842  | 4.194423 | H | 19.09325 | 10.120370 | 4.193943        |
| C | 9.09656  | 1.836012  | 4.195323 |   |          |           |                 |
| c | 0.00000  | 0.00000   | 6.79212  |   |          |           | serrated zigzag |

## COF-3M

### Layer I AA, AB, inclined zigzag, and serrated zigzag

|   |           |           |          |
|---|-----------|-----------|----------|
| C | 5.821692  | 5.488254  | 0.793766 |
| C | 5.859315  | 4.085139  | 0.793766 |
| C | 7.057359  | 3.353438  | 0.793766 |
| C | 8.253873  | 4.087584  | 0.793766 |
| C | 8.288739  | 5.490777  | 0.793766 |
| C | 7.054536  | 6.159733  | 0.793766 |
| B | 7.057135  | 1.856436  | 0.793766 |
| O | 5.849398  | 1.162547  | 0.793766 |
| B | 9.585465  | 6.238942  | 0.793766 |
| O | 3.319859  | 5.539076  | 0.793766 |
| B | 4.525276  | 6.236943  | 0.793766 |
| O | 0.7937660 | 1.160613  | 0.793766 |
| H | 9.210704  | 3.538126  | 0.793766 |
| H | 4.903924  | 3.533164  | 0.793766 |
| H | 3.318080  | 0.7937660 | 0.793766 |

Transformation matrix

|   |          |          |                          |
|---|----------|----------|--------------------------|
| a | 7.469940 | 0.000000 | 0.000000                 |
| b | 3.734970 | 6.469160 | 0.000000                 |
| c | 0.000000 | 0.000000 | 3.488410 AA              |
| c | 1.197280 | 0.691250 | 3.420000 Inclined zigzag |

### Layer II AB stacking

|   |          |          |          |
|---|----------|----------|----------|
| C | 9.556662 | 7.644640 | 4.062411 |
| C | 9.594285 | 6.241525 | 4.062411 |
| C | 10.79233 | 5.509824 | 4.062411 |
| C | 11.98884 | 6.243970 | 4.062411 |
| C | 12.02371 | 7.647163 | 4.062411 |
| C | 10.78951 | 8.316119 | 4.062411 |

|   |          |          |            |
|---|----------|----------|------------|
| B | 10.79210 | 4.012822 | 4.062411   |
| O | 9.584368 | 3.318933 | 4.062411   |
| B | 13.32044 | 8.395329 | 4.062411   |
| O | 7.054829 | 7.695462 | 4.062411   |
| B | 8.260246 | 8.393329 | 4.062411   |
| O | 4.528736 | 3.316999 | 4.062411   |
| H | 12.94567 | 5.694512 | 4.062411   |
| H | 8.638894 | 5.689550 | 4.062411   |
| H | 7.053050 | 2.950152 | 4.062411   |
| c | 0.00000  | 0.00000  | 6.53729 AB |

### Layer II serrated zigzag

|   |          |          |                         |
|---|----------|----------|-------------------------|
| C | 7.018972 | 6.179504 | 4.206926                |
| C | 7.056595 | 4.776389 | 4.206926                |
| C | 8.254640 | 4.044688 | 4.206926                |
| C | 9.451153 | 4.778834 | 4.206926                |
| C | 9.486019 | 6.182027 | 4.206926                |
| C | 4.516846 | 0.381823 | 4.206926                |
| B | 8.254416 | 2.547686 | 4.206926                |
| O | 7.046678 | 1.853797 | 4.206926                |
| B | 7.047780 | 0.461032 | 4.206926                |
| O | 4.517139 | 6.230326 | 4.206926                |
| B | 1.987586 | 0.459033 | 4.206926                |
| O | 1.991046 | 1.851863 | 4.206926                |
| H | 2.938040 | 4.229376 | 4.206926                |
| H | 6.101204 | 4.224414 | 4.206926                |
| H | 4.515360 | 1.485016 | 4.206926                |
| c | 0.00000  | 0.00000  | 6.82632 serrated zigzag |

## PPy-COF

### Layer I AA, AB, inclined zigzag, and serrated zigzag

|   |          |          |          |   |          |          |           |   |          |          |           |
|---|----------|----------|----------|---|----------|----------|-----------|---|----------|----------|-----------|
| C | 11.35865 | 16.45284 | 0.793925 | C | 21.18579 | 2.159241 | 0.7941000 | C | 22.44165 | 5.668580 | 0.7939750 |
| C | 11.38651 | 15.04819 | 0.793975 | C | 21.21311 | 3.560100 | 0.7941000 | H | 22.13766 | 8.368893 | 0.7938500 |
| C | 12.58565 | 14.32387 | 0.794000 | B | 31.15145 | 19.26523 | 0.7940250 | H | 17.82290 | 8.369067 | 0.7943000 |
| C | 13.82106 | 15.03222 | 0.793975 | O | 32.36685 | 18.58465 | 0.7939750 | C | 17.52082 | 5.666763 | 0.7942250 |
| C | 13.81621 | 16.45653 | 0.793925 | B | 10.05600 | 17.19214 | 0.7939250 | H | 22.13976 | 1.606842 | 0.7941250 |
| C | 12.58860 | 17.13289 | 0.793875 | O | 31.17973 | 16.47913 | 0.7939000 | C | 22.44209 | 4.307889 | 0.7940500 |
| C | 15.05371 | 14.31962 | 0.794025 | B | 29.96877 | 17.16670 | 0.7939500 | C | 17.52160 | 4.305840 | 0.7941750 |
| C | 15.05690 | 12.89544 | 0.793975 | O | 29.95041 | 18.55973 | 0.7940000 | H | 17.82505 | 1.604832 | 0.7940250 |
| C | 16.28348 | 12.21823 | 0.793975 | C | 28.67703 | 16.40861 | 0.7939500 | C | 15.07907 | 17.14633 | 0.7939750 |
| C | 17.51485 | 12.89589 | 0.794075 | C | 27.44604 | 17.08635 | 0.7940750 | H | 12.58726 | 18.23522 | 0.7938000 |
| C | 17.48922 | 14.30122 | 0.794150 | C | 26.21960 | 16.40935 | 0.7940750 | H | 10.43102 | 14.49862 | 0.7940500 |
| C | 16.29005 | 15.02674 | 0.794100 | C | 26.21594 | 14.98518 | 0.7940000 | C | 12.61698 | 12.88572 | 0.7939750 |
| B | 18.80745 | 12.13886 | 0.794100 | C | 27.45222 | 14.27783 | 0.7939250 | H | 18.44503 | 14.85062 | 0.7942500 |
| O | 20.01934 | 12.82580 | 0.794100 | C | 28.65134 | 15.00327 | 0.7938750 | C | 16.25751 | 16.46517 | 0.7940750 |
| B | 21.21724 | 12.11402 | 0.794075 | C | 24.98299 | 14.27328 | 0.7940250 | C | 13.79484 | 12.20472 | 0.7939500 |
| O | 21.20629 | 10.72118 | 0.794075 | C | 23.74797 | 14.98228 | 0.7940250 | H | 16.28412 | 11.11581 | 0.7939250 |
| B | 19.99100 | 10.03987 | 0.794075 | C | 22.54846 | 14.25844 | 0.7940250 | H | 28.37327 | 12.28811 | 0.7938500 |
| O | 18.79020 | 10.74570 | 0.794075 | C | 22.52000 | 12.85340 | 0.7940750 | H | 26.24156 | 11.05674 | 0.7940500 |
| C | 19.98093 | 8.542014 | 0.794075 | C | 23.75001 | 12.17288 | 0.7941250 | H | 24.95853 | 18.20265 | 0.7941500 |
| C | 18.77697 | 7.816687 | 0.794200 | C | 24.97778 | 12.84901 | 0.7940500 | H | 22.82538 | 16.97153 | 0.7940500 |
| C | 18.74956 | 6.415403 | 0.794175 | C | 27.41899 | 12.83925 | 0.7939250 | H | 23.39572 | 6.220187 | 0.7939000 |
| C | 19.98089 | 5.699238 | 0.794100 | H | 29.60688 | 14.45348 | 0.7937500 | H | 23.39716 | 3.757810 | 0.7940500 |
| C | 21.21208 | 6.415209 | 0.794000 | H | 27.44672 | 18.18865 | 0.7941750 | H | 16.56561 | 6.216244 | 0.7943000 |

|   |          |          |          |   |          |          |           |   |          |          |           |
|---|----------|----------|----------|---|----------|----------|-----------|---|----------|----------|-----------|
| C | 21.18410 | 7.815895 | 0.793975 | C | 24.95805 | 17.10069 | 0.7941000 | H | 16.56737 | 3.754214 | 0.7941750 |
| C | 19.98162 | 4.275395 | 0.794100 | H | 23.74866 | 11.07031 | 0.7941750 | H | 17.21184 | 17.01626 | 0.7941250 |
| C | 18.75092 | 3.558709 | 0.794100 | C | 26.24024 | 12.15864 | 0.7940250 | H | 15.08064 | 18.24831 | 0.7939250 |
| C | 18.77876 | 2.157579 | 0.794050 | C | 23.77973 | 16.42044 | 0.7940500 | H | 13.79363 | 11.10274 | 0.7939250 |
| C | 19.98266 | 1.432851 | 0.794075 | H | 21.59317 | 14.80879 | 0.7939750 | H | 11.66185 | 12.33587 | 0.7940000 |

Transformation Matrix

|          |           |           |          |                 |
|----------|-----------|-----------|----------|-----------------|
| <b>a</b> | 22.320600 | 0.000000  | 0.000000 |                 |
| <b>b</b> | 11.160300 | 19.330200 | 0.000000 |                 |
| <b>c</b> | 0.000000  | 0.000000  | 3.488000 | AA              |
| <b>c</b> | 1.21997   | 0.70435   | 3.411452 | inclined zigzag |

**Layer II AB stacking**

|          |          |          |          |   |          |          |          |   |          |          |          |
|----------|----------|----------|----------|---|----------|----------|----------|---|----------|----------|----------|
| C        | 22.51895 | 22.89624 | 3.762205 | C | 32.34609 | 8.602643 | 3.762380 | C | 33.60195 | 12.11198 | 3.762255 |
| C        | 22.54681 | 21.49159 | 3.762255 | C | 32.37341 | 10.00350 | 3.762380 | H | 33.29796 | 14.81229 | 3.762130 |
| C        | 23.74595 | 20.76727 | 3.762280 | B | 42.31175 | 25.70863 | 3.762305 | H | 28.98320 | 14.81247 | 3.762580 |
| C        | 24.98136 | 21.47562 | 3.762255 | O | 43.52715 | 25.02805 | 3.762255 | C | 28.68112 | 12.11016 | 3.762505 |
| C        | 24.97651 | 22.89993 | 3.762205 | B | 21.21630 | 23.63554 | 3.762205 | H | 33.30006 | 8.050244 | 3.762405 |
| C        | 23.74890 | 23.57629 | 3.762155 | O | 42.34003 | 22.92253 | 3.762180 | C | 33.60239 | 10.75129 | 3.762330 |
| C        | 26.21401 | 20.76302 | 3.762305 | B | 41.12907 | 23.61010 | 3.762230 | C | 28.68190 | 10.74924 | 3.762455 |
| C        | 26.21720 | 19.33884 | 3.762255 | O | 41.11071 | 25.00313 | 3.762280 | H | 28.98535 | 8.048234 | 3.762305 |
| C        | 27.44378 | 18.66163 | 3.762255 | C | 39.83733 | 22.85201 | 3.762230 | C | 26.23937 | 23.58973 | 3.762255 |
| C        | 28.67515 | 19.33929 | 3.762355 | C | 38.60634 | 23.52975 | 3.762355 | H | 23.74756 | 24.67862 | 3.762080 |
| C        | 28.64952 | 20.74462 | 3.762430 | C | 37.37990 | 22.85275 | 3.762355 | H | 21.59132 | 20.94202 | 3.762330 |
| C        | 27.45035 | 21.47014 | 3.762380 | C | 37.37624 | 21.42858 | 3.762280 | C | 23.77728 | 19.32912 | 3.762255 |
| B        | 29.96775 | 18.58226 | 3.762380 | C | 38.61252 | 20.72123 | 3.762205 | H | 29.60533 | 21.29402 | 3.762530 |
| O        | 31.17964 | 19.26920 | 3.762380 | C | 39.81164 | 21.44667 | 3.762155 | C | 27.41781 | 22.90857 | 3.762355 |
| B        | 32.37754 | 18.55742 | 3.762355 | C | 36.14329 | 20.71668 | 3.762305 | C | 24.95514 | 18.64812 | 3.762230 |
| O        | 32.36659 | 17.16458 | 3.762355 | C | 34.90827 | 21.42568 | 3.762305 | H | 27.44442 | 17.55921 | 3.762205 |
| B        | 31.15130 | 16.48327 | 3.762355 | C | 33.70876 | 20.70184 | 3.762305 | H | 39.53357 | 18.73151 | 3.762130 |
| O        | 29.95050 | 17.18910 | 3.762355 | C | 33.68030 | 19.29680 | 3.762355 | H | 37.40186 | 17.50014 | 3.762330 |
| C        | 31.14123 | 14.98542 | 3.762355 | C | 34.91031 | 18.61628 | 3.762405 | H | 36.11883 | 24.64605 | 3.762430 |
| C        | 29.93727 | 14.26009 | 3.762480 | C | 36.13808 | 19.29241 | 3.762330 | H | 33.98568 | 23.41493 | 3.762330 |
| C        | 29.90986 | 12.85880 | 3.762455 | C | 38.57929 | 19.28265 | 3.762205 | H | 34.55602 | 12.66359 | 3.762180 |
| C        | 31.14119 | 12.14264 | 3.762380 | H | 40.76718 | 20.89688 | 3.762030 | H | 34.55746 | 10.20121 | 3.762330 |
| C        | 32.37238 | 12.85861 | 3.762280 | H | 38.60702 | 24.63205 | 3.762455 | H | 27.72591 | 12.65965 | 3.762580 |
| C        | 32.34440 | 14.25930 | 3.762255 | C | 36.11835 | 23.54409 | 3.762380 | H | 27.72767 | 10.19762 | 3.762455 |
| C        | 31.14192 | 10.71880 | 3.762380 | H | 34.90896 | 17.51371 | 3.762455 | H | 28.37214 | 23.45966 | 3.762405 |
| C        | 29.91122 | 10.00211 | 3.762380 | C | 37.40054 | 18.60204 | 3.762305 | H | 26.24094 | 24.69171 | 3.762205 |
| C        | 29.93906 | 8.600981 | 3.762330 | C | 34.94003 | 22.86384 | 3.762330 | H | 24.95393 | 17.54614 | 3.762205 |
| C        | 31.14296 | 7.876253 | 3.762355 | H | 32.75347 | 21.25219 | 3.762255 | H | 22.82215 | 18.77927 | 3.762280 |
| <b>c</b> | 0.00000  | 0.00000  | 5.93656  |   | AB       |          |          |   |          |          |          |

**Layer II serrated zigzag**

|   |          |           |          |   |          |           |          |   |          |          |          |
|---|----------|-----------|----------|---|----------|-----------|----------|---|----------|----------|----------|
| C | 12.57862 | 17.157190 | 4.203665 | C | 22.40576 | 2.863591  | 4.203840 | C | 23.66162 | 6.37293  | 4.203715 |
| C | 12.60648 | 15.752540 | 4.203715 | C | 22.43308 | 4.264450  | 4.203840 | H | 23.35763 | 9.07324  | 4.203590 |
| C | 13.80562 | 15.028220 | 4.203740 | B | 21.21112 | 0.639380  | 4.203765 | H | 19.04287 | 9.07341  | 4.204040 |
| C | 15.04103 | 15.736570 | 4.203715 | O | 11.26622 | 19.289000 | 4.203715 | C | 18.74079 | 6.37111  | 4.203965 |
| C | 15.03618 | 17.160880 | 4.203665 | B | 11.27597 | 17.896490 | 4.203665 | H | 23.35973 | 2.31119  | 4.203865 |
| C | 13.80857 | 17.837240 | 4.203615 | O | 10.07910 | 17.183480 | 4.203640 | C | 23.66206 | 5.01223  | 4.203790 |
| C | 16.27368 | 15.023970 | 4.203765 | B | 31.18874 | 17.871050 | 4.203690 | C | 18.74157 | 5.01019  | 4.203915 |
| C | 16.27687 | 13.599790 | 4.203715 | O | 31.17038 | 19.264080 | 4.203740 | H | 19.04502 | 2.30918  | 4.203765 |
| C | 17.50345 | 12.922580 | 4.203715 | C | 29.89700 | 17.112960 | 4.203690 | C | 16.29904 | 17.85068 | 4.203715 |
| C | 18.73482 | 13.600240 | 4.203815 | C | 28.66601 | 17.790700 | 4.203815 | H | 13.80723 | 18.93957 | 4.203540 |
| C | 18.70919 | 15.005570 | 4.203890 | C | 27.43957 | 17.113700 | 4.203815 | H | 11.65099 | 15.20297 | 4.203790 |
| C | 17.51002 | 15.731090 | 4.203840 | C | 27.43591 | 15.689530 | 4.203740 | C | 13.83695 | 13.59007 | 4.203715 |
| B | 20.02742 | 12.843210 | 4.203840 | C | 28.67219 | 14.982180 | 4.203665 | H | 19.66500 | 15.55497 | 4.203990 |
| O | 21.23931 | 13.530150 | 4.203840 | C | 29.87131 | 15.707620 | 4.203615 | C | 17.47748 | 17.16952 | 4.203815 |
| B | 22.43721 | 12.818370 | 4.203815 | C | 26.20296 | 14.977630 | 4.203765 | C | 15.01481 | 12.90907 | 4.203690 |
| O | 22.42626 | 11.425530 | 4.203815 | C | 24.96794 | 15.686630 | 4.203765 | H | 17.50409 | 11.82016 | 4.203665 |

|   |          |           |          |   |          |           |          |   |          |          |                 |
|---|----------|-----------|----------|---|----------|-----------|----------|---|----------|----------|-----------------|
| B | 21.21097 | 10.744220 | 4.203815 | C | 23.76843 | 14.962790 | 4.203765 | H | 29.59324 | 12.99246 | 4.203590        |
| O | 20.01017 | 11.450050 | 4.203815 | C | 23.73997 | 13.557750 | 4.203815 | H | 27.46153 | 11.76109 | 4.203790        |
| C | 21.20090 | 9.246365  | 4.203815 | C | 24.96998 | 12.877230 | 4.203865 | H | 26.17850 | 18.90700 | 4.203890        |
| C | 19.99694 | 8.521037  | 4.203940 | C | 26.19775 | 13.553360 | 4.203790 | H | 24.04535 | 17.67588 | 4.203790        |
| C | 19.96953 | 7.119753  | 4.203915 | C | 28.63896 | 13.543600 | 4.203665 | H | 24.61569 | 6.92453  | 4.203640        |
| C | 21.20086 | 6.403588  | 4.203840 | H | 30.82685 | 15.157830 | 4.203490 | H | 24.61713 | 4.46216  | 4.203790        |
| C | 22.43205 | 7.119559  | 4.203740 | H | 28.66669 | 18.893000 | 4.203915 | H | 17.78558 | 6.92059  | 4.204040        |
| C | 22.40407 | 8.520245  | 4.203715 | C | 26.17802 | 17.805040 | 4.203840 | H | 17.78734 | 4.45856  | 4.203915        |
| C | 21.20159 | 4.979745  | 4.203840 | H | 24.96863 | 11.774660 | 4.203915 | H | 18.43181 | 17.72061 | 4.203865        |
| C | 19.97089 | 4.263059  | 4.203840 | C | 27.46021 | 12.862990 | 4.203765 | H | 16.30061 | 18.95266 | 4.203665        |
| C | 19.99873 | 2.861929  | 4.203790 | C | 24.99970 | 17.124790 | 4.203790 | H | 15.01360 | 11.80709 | 4.203665        |
| C | 21.20263 | 2.137201  | 4.203815 | H | 22.81314 | 15.513140 | 4.203715 | H | 12.88182 | 13.04022 | 4.203740        |
| c | 0.00000  | 0.00000   | 6.81948  |   |          |           |          |   |          |          | serrated zigzag |

## COF-5

### Layer I AA, AB, inclined zigzag & armchair, and serrated zigzag & armchair

|   |          |          |           |   |          |          |           |   |          |           |           |
|---|----------|----------|-----------|---|----------|----------|-----------|---|----------|-----------|-----------|
| C | 39.38465 | 22.38862 | 0.8077360 | O | 20.47563 | 18.71826 | 0.8808860 | B | 35.64685 | 23.16284  | 0.8173060 |
| C | 39.41922 | 20.98273 | 0.8040060 | C | 15.45640 | 10.01228 | 0.8776360 | O | 34.40619 | 22.51739  | 0.8181660 |
| C | 38.18019 | 20.31742 | 0.7978060 | C | 16.65255 | 9.272400 | 0.8877860 | C | 24.35300 | 22.27500  | 0.8515860 |
| C | 36.98136 | 21.01507 | 0.7988360 | C | 16.64961 | 7.885280 | 0.8870660 | C | 24.30941 | 20.86914  | 0.8521860 |
| C | 36.94609 | 22.42116 | 0.8066160 | C | 15.45058 | 7.150020 | 0.8764060 | C | 23.10522 | 20.17951  | 0.8579360 |
| C | 38.18526 | 23.08650 | 0.8090860 | C | 14.25431 | 7.889580 | 0.8657860 | C | 21.87033 | 20.85244  | 0.8632060 |
| B | 40.70932 | 20.22534 | 0.8125860 | C | 14.25719 | 9.277330 | 0.8661560 | C | 21.91408 | 22.25825  | 0.8607860 |
| O | 41.96477 | 20.84153 | 0.8205360 | B | 15.45885 | 5.653904 | 0.8753560 | C | 23.11767 | 22.94780  | 0.8555060 |
| C | 12.75951 | 19.73973 | 0.8336660 | O | 16.63828 | 4.902127 | 0.8771360 | H | 36.03313 | 20.45280  | 0.7953560 |
| C | 14.13734 | 19.76794 | 0.8462360 | C | 16.18376 | 3.533013 | 0.8730860 | H | 38.16029 | 19.21536  | 0.7937660 |
| C | 14.82425 | 18.53141 | 0.8582860 | C | 16.92734 | 2.372618 | 0.8702360 | H | 40.33294 | 22.95052  | 0.8117860 |
| C | 14.10000 | 17.30940 | 0.8571560 | C | 16.23177 | 1.141180 | 0.8641860 | H | 38.20604 | 24.18863  | 0.8138360 |
| C | 12.68582 | 17.31851 | 0.8439560 | C | 14.81144 | 1.121423 | 0.8625060 | H | 13.29518 | 9.815740  | 0.8570360 |
| C | 12.04926 | 18.54070 | 0.8325360 | C | 14.08058 | 2.332607 | 0.8653360 | H | 13.29003 | 7.355373  | 0.8564160 |
| C | 14.81330 | 16.03980 | 0.8681360 | C | 14.79044 | 3.514143 | 0.8701060 | H | 17.61128 | 7.346499  | 0.8952160 |
| C | 16.23385 | 16.02310 | 0.8794360 | C | 29.16997 | 25.94961 | 0.8570560 | H | 17.61656 | 9.807080  | 0.8963160 |
| C | 16.97668 | 17.27594 | 0.8794860 | C | 29.89655 | 24.72903 | 0.8511660 | H | 12.98228 | 14.85730  | 0.8558360 |
| C | 16.28037 | 18.51419 | 0.8695360 | C | 31.35303 | 24.74986 | 0.8490860 | H | 18.91793 | 16.28417  | 0.8931860 |
| C | 16.93177 | 14.79286 | 0.8879560 | C | 32.04632 | 25.98983 | 0.8564860 | H | 16.43995 | 20.68804  | 0.8596360 |
| C | 16.19076 | 13.63059 | 0.8841660 | C | 29.21184 | 23.49104 | 0.8461360 | H | 18.03483 | 14.79542  | 0.8960660 |
| C | 14.79744 | 13.64734 | 0.8730660 | C | 27.83368 | 23.51634 | 0.8477060 | H | 14.71344 | 20.70860  | 0.8467560 |
| C | 14.08506 | 14.82721 | 0.8652860 | C | 27.12170 | 24.71423 | 0.8533060 | H | 12.13732 | 16.36148  | 0.8427860 |
| C | 16.99491 | 19.73474 | 0.8674060 | C | 27.75580 | 25.93760 | 0.8577160 | H | 23.10512 | 24.05012  | 0.8547660 |
| C | 18.37174 | 19.67534 | 0.8727360 | C | 33.46062 | 26.01705 | 0.8532360 | H | 12.13660 | 0.7937660 | 0.8618060 |
| C | 19.05533 | 18.46110 | 0.8813860 | C | 34.12878 | 24.81158 | 0.8402860 | H | 31.52002 | 22.57643  | 0.8325560 |
| C | 18.39107 | 17.25331 | 0.8862060 | C | 33.44818 | 23.59547 | 0.8326560 | H | 18.91479 | 0.8885610 | 0.8596660 |
| O | 14.30785 | 12.28935 | 0.8697560 | C | 32.07148 | 23.53168 | 0.8379660 | H | 29.78991 | 22.55151  | 0.8412660 |
| B | 15.46802 | 11.50839 | 0.8787360 | O | 25.70864 | 24.42541 | 0.8541060 | H | 18.03041 | 2.372697  | 0.8713860 |
| O | 16.64678 | 12.26132 | 0.8884360 | B | 25.64560 | 23.02835 | 0.8493860 | H | 12.97787 | 2.299852  | 0.8627160 |
| O | 40.77311 | 18.82814 | 0.8185360 | O | 26.90171 | 22.41331 | 0.8447660 | H | 20.96961 | 22.82688  | 0.8639060 |
| O | 19.32740 | 20.75623 | 0.8671860 | O | 14.29926 | 4.871904 | 0.8716060 | H | 23.11811 | 19.07719  | 0.8582860 |
| B | 20.56945 | 20.11355 | 0.8707860 | O | 35.55002 | 24.55802 | 0.8308860 | H | 25.25342 | 20.29993  | 0.8487160 |

#### Transformation Matrix

|          |           |           |          |                   |
|----------|-----------|-----------|----------|-------------------|
| <b>a</b> | 30.137400 | 0.000000  | 0.000000 |                   |
| <b>b</b> | 15.068700 | 26.099740 | 0.000000 |                   |
| <b>c</b> | 0.000000  | 0.000000  | 3.487498 | AA                |
| <b>c</b> | 1.197700  | 0.691492  | 3.405000 | inclined zigzag   |
| <b>c</b> | 1.387445  | 0.000000  | 3.410000 | inclined armchair |

## Layer II AB stacking

C 54.45335 31.08854 4.065051 O 35.54433 27.41818 4.138201 B 50.71555 31.86276 4.074621  
C 54.48792 29.68265 4.061321 C 30.52510 18.71220 4.134951 O 49.47488 31.21731 4.075481  
C 53.24889 29.01734 4.055121 C 31.72125 17.97232 4.145101 C 39.42170 30.97492 4.108901  
C 52.05006 29.71499 4.056151 C 31.71831 16.58520 4.144381 C 39.37811 29.56906 4.109501  
C 52.01479 31.12108 4.063931 C 30.51928 15.84994 4.133721 C 38.17392 28.87943 4.115251  
C 53.25396 31.78642 4.066401 C 29.32301 16.58950 4.123101 C 36.93903 29.55236 4.120521  
B 55.77802 28.92526 4.069901 C 29.32589 17.97725 4.123471 C 36.98278 30.95817 4.118101  
O 57.03347 29.54145 4.077851 B 30.52755 14.35382 4.132671 C 38.18637 31.64772 4.112821  
C 27.82821 28.43965 4.090981 O 31.70698 13.60205 4.134451 H 51.10183 29.15272 4.052671  
C 29.20604 28.46786 4.103551 C 31.25246 12.23293 4.130401 H 53.22898 27.91528 4.051081  
C 29.89295 27.23133 4.115601 C 31.99604 11.07254 4.127551 H 55.40164 31.65044 4.069101  
C 29.16870 26.00932 4.114471 C 31.30047 9.841098 4.121501 H 53.27474 32.88855 4.071151  
C 27.75452 26.01843 4.101271 C 29.88014 9.821341 4.119821 H 28.36388 18.51566 4.114351  
C 27.11796 27.24062 4.089851 C 29.14928 11.03253 4.122651 H 28.35873 16.05529 4.113731  
C 29.88200 24.73972 4.125451 C 29.85914 12.21406 4.127421 H 32.67998 16.04642 4.152531  
C 31.30255 24.72302 4.136751 C 44.23867 34.64953 4.114371 H 32.68526 18.50700 4.153631  
C 32.04538 25.97586 4.136801 C 44.96525 33.42895 4.108481 H 28.05098 23.55722 4.113151  
C 31.34907 27.21411 4.126851 C 46.42173 33.44978 4.106401 H 33.98663 24.98409 4.150501  
C 32.00047 23.49278 4.145271 C 47.11502 34.68975 4.113801 H 31.50865 29.38796 4.116951  
C 31.25946 22.33051 4.141481 C 44.28054 32.19096 4.103451 H 33.10353 23.49534 4.153381  
C 29.86614 22.34726 4.130381 C 42.90238 32.21626 4.105021 H 29.78214 29.40852 4.104071  
C 29.15376 23.52713 4.122601 C 42.19040 33.41415 4.110621 H 27.20602 25.06140 4.100101  
C 32.06361 28.43466 4.124721 C 42.82450 34.63752 4.115031 H 38.17382 32.75004 4.112081  
C 33.44044 28.37526 4.130051 C 48.52932 34.71697 4.110551 H 27.20530 9.493684 4.119121  
C 34.12403 27.16102 4.138701 C 49.19748 33.51150 4.097601 H 46.58872 31.27635 4.089871  
C 33.45977 25.95323 4.143521 C 48.51688 32.29539 4.089971 H 33.98349 9.588479 4.116981  
O 29.37655 20.98927 4.127071 C 47.14018 32.23160 4.095281 H 44.85861 31.25143 4.098581  
B 30.53672 20.20831 4.136051 O 40.77734 33.12533 4.111421 H 33.09911 11.07261 4.128701  
O 31.71548 20.96124 4.145751 B 40.71430 31.72827 4.106701 H 28.04657 10.99977 4.120031  
O 55.84181 27.52806 4.075851 O 41.97041 31.11323 4.102081 H 36.03831 31.52680 4.121221  
O 34.39610 29.45615 4.124501 O 29.36796 13.57182 4.128921 H 38.18681 27.77711 4.115601  
B 35.63815 28.81347 4.128101 O 50.61872 33.25794 4.088201 H 40.32212 28.99985 4.106031  
c 0.00000 0.00000 6.51463 AB

## Layer II serrated zigzag

C 40.58235 23.08011 4.22612 O 21.67333 19.409750 4.299271 B 36.84455 23.854330 4.23569100  
C 40.61692 21.67422 4.22239 C 16.65410 10.703770 4.296021 O 35.60389 23.208880 4.23655100  
C 39.37789 21.00891 4.21619 C 17.85025 9.963892 4.306171 C 25.55070 22.966490 4.26997100  
C 38.17906 21.70656 4.21722 C 17.84731 8.576772 4.305451 C 25.50711 21.560630 4.27057100  
C 38.14380 23.11265 4.22500 C 16.64828 7.841512 4.294791 C 24.30292 20.871000 4.27632100  
C 39.38296 23.77799 4.22747 C 15.45201 8.581072 4.284171 C 23.06803 21.543930 4.28159100  
B 41.90702 20.91683 4.23097 C 15.45489 9.968822 4.284541 C 23.11178 22.949740 4.27917100  
O 13.02507 21.53302 4.23892 B 16.65655 6.345396 4.293741 C 24.31537 23.639290 4.27389100  
C 13.95721 20.43122 4.25205 O 17.83598 5.593619 4.295521 H 37.23083 21.144290 4.21374100  
C 15.33504 20.45943 4.26462 C 17.38146 4.224505 4.291471 H 39.35799 19.906850 4.21215100  
C 16.02195 19.22290 4.27667 C 18.12504 3.064110 4.288621 H 41.53064 23.642010 4.23017100  
C 15.29770 18.00089 4.27554 C 17.42947 1.832672 4.282571 H 39.40374 24.880120 4.23222100  
C 13.88352 18.01000 4.26234 C 16.00914 1.812915 4.280891 H 14.49288 10.507230 4.27542100  
C 13.24696 19.23219 4.25092 C 15.27828 3.024099 4.283721 H 14.48773 8.046865 4.27480100  
C 16.01100 16.73129 4.28652 C 15.98814 4.205635 4.288491 H 18.80898 8.037991 4.31360100  
C 17.43155 16.71459 4.29782 C 15.29897 0.541360 4.275441 H 18.81426 10.498570 4.31470100  
C 18.17438 17.96743 4.29787 C 31.09425 25.420520 4.269551 H 14.17998 15.548790 4.27422100  
C 17.47807 19.20568 4.28792 C 32.55073 25.441350 4.267471 H 20.11563 16.975660 4.31157100  
C 18.12947 15.48435 4.30634 C 18.17532 0.581580 4.274871 H 17.63765 21.379530 4.27802100  
C 17.38846 14.32208 4.30255 C 30.40954 24.182530 4.264521 H 19.23253 15.486910 4.31445100  
C 15.99514 14.33883 4.29145 C 29.03138 24.207830 4.266091 H 15.91114 21.400090 4.26514100  
C 15.28276 15.51870 4.28367 C 28.31940 25.405720 4.271691 H 13.33502 17.052970 4.26117100  
C 18.19261 20.42623 4.28579 C 13.88480 0.529350 4.276101 H 24.30282 24.741610 4.27315100  
C 19.56944 20.36683 4.29112 C 19.58962 0.608800 4.271621 H 13.33430 1.485258 4.28019100  
C 20.25303 19.15259 4.29977 C 35.32648 25.503070 4.258671 H 32.71772 23.267920 4.25094100

|   |          |          |         |                 |          |           |          |   |          |           |            |
|---|----------|----------|---------|-----------------|----------|-----------|----------|---|----------|-----------|------------|
| C | 19.58877 | 17.94480 | 4.30459 | C               | 34.64588 | 24.286960 | 4.251041 | H | 20.11249 | 1.580053  | 4.27805100 |
| O | 15.50555 | 12.98084 | 4.28814 | C               | 33.26918 | 24.223170 | 4.256351 | H | 30.98761 | 23.243000 | 4.25965100 |
| B | 16.66572 | 12.19988 | 4.29712 | O               | 26.90634 | 25.116900 | 4.272491 | H | 19.22811 | 3.064189  | 4.28977100 |
| O | 17.84448 | 12.95281 | 4.30682 | B               | 26.84330 | 23.719840 | 4.267771 | H | 14.17557 | 2.991344  | 4.28110100 |
| O | 11.83341 | 19.51963 | 4.23692 | O               | 28.09941 | 23.104800 | 4.263151 | H | 22.16731 | 23.518370 | 4.28229100 |
| O | 20.52510 | 21.44772 | 4.28557 | O               | 15.49696 | 5.563396  | 4.289991 | H | 24.31581 | 19.768680 | 4.27667100 |
| B | 21.76715 | 20.80504 | 4.28917 | O               | 36.74772 | 25.249510 | 4.249271 | H | 26.45112 | 20.991420 | 4.26710100 |
| c | 0.00000  | 0.00000  | 6.83677 | serrated zigzag |          |           |          |   |          |           |            |

### Layer II serrated armchair

|   |          |          |         |                   |          |           |          |   |          |           |         |
|---|----------|----------|---------|-------------------|----------|-----------|----------|---|----------|-----------|---------|
| C | 40.77209 | 22.38862 | 4.22813 | O                 | 21.86308 | 18.718260 | 4.301286 | B | 37.03430 | 23.162840 | 4.23770 |
| C | 40.80666 | 20.98273 | 4.22440 | C                 | 16.84385 | 10.012280 | 4.298036 | O | 35.79363 | 22.517390 | 4.23856 |
| C | 39.56763 | 20.31742 | 4.21820 | C                 | 18.04000 | 9.272400  | 4.308186 | C | 25.74045 | 22.275000 | 4.27198 |
| C | 38.36880 | 21.01507 | 4.21923 | C                 | 18.03706 | 7.885280  | 4.307466 | C | 25.69686 | 20.869140 | 4.27258 |
| C | 38.33354 | 22.42116 | 4.22701 | C                 | 16.83802 | 7.150020  | 4.296806 | C | 24.49267 | 20.179510 | 4.27833 |
| C | 39.57270 | 23.08650 | 4.22948 | C                 | 15.64175 | 7.889580  | 4.286186 | C | 23.25778 | 20.852440 | 4.28360 |
| B | 11.95936 | 20.22534 | 4.23298 | C                 | 15.64463 | 9.277330  | 4.286556 | C | 23.30153 | 22.258250 | 4.28118 |
| O | 13.21481 | 20.84153 | 4.24093 | B                 | 16.84629 | 5.653904  | 4.295756 | C | 24.50512 | 22.947800 | 4.27590 |
| C | 14.14696 | 19.73973 | 4.25406 | O                 | 18.02573 | 4.902127  | 4.297536 | H | 37.42057 | 20.452800 | 4.21575 |
| C | 15.52478 | 19.76794 | 4.26663 | C                 | 17.57121 | 3.533013  | 4.293486 | H | 39.54773 | 19.215360 | 4.21416 |
| C | 16.21169 | 18.53141 | 4.27868 | C                 | 18.31479 | 2.372618  | 4.290636 | H | 41.72038 | 22.950520 | 4.23218 |
| C | 15.48745 | 17.30940 | 4.27755 | C                 | 17.61922 | 1.141180  | 4.284586 | H | 39.59349 | 24.188630 | 4.23423 |
| C | 14.07327 | 17.31851 | 4.26435 | C                 | 16.19888 | 1.121423  | 4.282906 | H | 14.68262 | 9.815740  | 4.27743 |
| C | 13.43670 | 18.54070 | 4.25293 | C                 | 15.46803 | 2.332607  | 4.285736 | H | 14.67747 | 7.355373  | 4.27681 |
| C | 16.20074 | 16.03980 | 4.28853 | C                 | 16.17789 | 3.514143  | 4.290506 | H | 18.99873 | 7.346499  | 4.31561 |
| C | 17.62130 | 16.02310 | 4.29983 | C                 | 30.55742 | 25.949610 | 4.277456 | H | 19.00401 | 9.807080  | 4.31671 |
| C | 18.36413 | 17.27594 | 4.29988 | C                 | 31.28399 | 24.729030 | 4.271566 | H | 14.36972 | 14.857300 | 4.27623 |
| C | 17.66782 | 18.51419 | 4.28993 | C                 | 32.74047 | 24.749860 | 4.269486 | H | 20.30538 | 16.284170 | 4.31358 |
| C | 18.31922 | 14.79286 | 4.30835 | C                 | 33.43377 | 25.989830 | 4.276886 | H | 17.82740 | 20.688040 | 4.28003 |
| C | 17.57821 | 13.63059 | 4.30456 | C                 | 30.59929 | 23.491040 | 4.266536 | H | 19.42228 | 14.795420 | 4.31646 |
| C | 16.18489 | 13.64734 | 4.29346 | C                 | 29.22112 | 23.516340 | 4.268106 | H | 16.10089 | 20.708600 | 4.26715 |
| C | 15.47251 | 14.82721 | 4.28568 | C                 | 28.50915 | 24.714230 | 4.273706 | H | 13.52477 | 16.361480 | 4.26318 |
| C | 18.38235 | 19.73474 | 4.28780 | C                 | 29.14325 | 25.937600 | 4.278116 | H | 24.49257 | 24.050120 | 4.27516 |
| C | 19.75919 | 19.67534 | 4.29313 | C                 | 34.84806 | 26.017050 | 4.273636 | H | 13.52404 | 0.793766  | 4.28220 |
| C | 20.44278 | 18.46110 | 4.30178 | C                 | 35.51623 | 24.811580 | 4.260686 | H | 32.90746 | 22.576430 | 4.25295 |
| C | 19.77851 | 17.25331 | 4.30660 | C                 | 34.83562 | 23.595470 | 4.253056 | H | 20.30223 | 0.888561  | 4.28006 |
| O | 15.69530 | 12.28935 | 4.29015 | C                 | 33.45892 | 23.531680 | 4.258366 | H | 31.17735 | 22.551510 | 4.26166 |
| B | 16.85546 | 11.50839 | 4.29913 | O                 | 27.09608 | 24.425410 | 4.274506 | H | 19.41786 | 2.372697  | 4.29178 |
| O | 18.03423 | 12.26132 | 4.30883 | B                 | 27.03304 | 23.028350 | 4.269786 | H | 14.36531 | 2.299852  | 4.28311 |
| O | 12.02315 | 18.82814 | 4.23893 | O                 | 28.28916 | 22.413310 | 4.265166 | H | 22.35706 | 22.826880 | 4.28430 |
| O | 20.71485 | 20.75623 | 4.28758 | O                 | 15.68670 | 4.871904  | 4.292006 | H | 24.50556 | 19.077190 | 4.27868 |
| B | 21.95690 | 20.11355 | 4.29118 | O                 | 36.93746 | 24.558020 | 4.251286 | H | 26.64087 | 20.299930 | 4.26911 |
| c | 0.00000  | 0.00000  | 6.84080 | serrated armchair |          |           |          |   |          |           |         |

## COF-10

### Layer I AA, AB, inclined zigzag & armchair, and serrated zigzag & armchair

|   |          |          |          |   |          |          |          |   |          |          |          |
|---|----------|----------|----------|---|----------|----------|----------|---|----------|----------|----------|
| B | 37.50977 | 27.53210 | 0.793766 | C | 19.43546 | 9.657603 | 0.793766 | C | 38.24199 | 20.51853 | 0.793766 |
| O | 36.34117 | 26.76319 | 0.793766 | C | 19.42151 | 7.265988 | 0.793766 | C | 40.32082 | 19.33411 | 0.793766 |
| C | 37.50737 | 29.02741 | 0.793766 | C | 20.14871 | 8.436213 | 0.793766 | C | 38.94325 | 19.28997 | 0.793766 |
| C | 36.30821 | 29.76566 | 0.793766 | H | 21.25162 | 8.448972 | 0.793766 | H | 38.37680 | 18.34322 | 0.793766 |
| C | 36.30917 | 31.15210 | 0.793766 | H | 20.89360 | 3.437906 | 0.793766 | H | 42.89956 | 16.15324 | 0.793766 |
| C | 37.51363 | 31.87336 | 0.793766 | H | 20.88455 | 0.961991 | 0.793766 | H | 45.04575 | 14.91717 | 0.793766 |
| C | 36.80304 | 23.00954 | 0.793766 | B | 13.72391 | 13.79473 | 0.793766 | O | 38.68137 | 26.76693 | 0.793766 |
| C | 36.81699 | 25.40116 | 0.793766 | O | 13.80313 | 12.39784 | 0.793766 | C | 38.70895 | 29.76133 | 0.793766 |
| C | 36.08978 | 24.23090 | 0.793766 | C | 12.42878 | 14.54264 | 0.793766 | C | 38.71519 | 31.14767 | 0.793766 |
| H | 34.98686 | 24.21814 | 0.793766 | C | 11.19060 | 13.87164 | 0.793766 | C | 38.22355 | 23.00970 | 0.793766 |
| H | 35.34490 | 29.22924 | 0.793766 | C | 9.988718 | 14.56286 | 0.793766 | C | 38.21038 | 25.40227 | 0.793766 |
| H | 35.35394 | 31.70512 | 0.793766 | C | 9.963801 | 15.96625 | 0.793766 | C | 38.93695 | 24.23109 | 0.793766 |







C 19.92787 1.488336 4.206926 C 46.24971 16.71558 4.206926 H 17.76856 1.665103 4.206926  
c 0.00000 0.00000 6.82632 serrated zigzag

### Layer II serrated armchair

B 38.89766 27.532100 4.20692 C 20.82335 9.657603 4.20692 C 39.62988 20.518530 4.20692  
O 37.72906 26.763190 4.20692 C 20.80941 7.265988 4.20692 C 41.70871 19.334110 4.20692  
C 38.89526 29.027410 4.20692 C 21.53661 8.436213 4.20692 C 40.33114 19.289970 4.20692  
C 37.69610 29.765660 4.20692 H 22.63951 8.448972 4.20692 H 39.76469 18.343220 4.20692  
C 37.69706 31.152100 4.20692 H 22.28150 3.437906 4.20692 H 44.28745 16.153240 4.20692  
C 38.90152 31.873360 4.20692 H 22.27245 0.961991 4.20692 H 8.850620 14.917170 4.20692  
C 38.19093 23.009540 4.20692 B 15.11180 13.794730 4.20692 O 40.06926 26.766930 4.20692  
C 38.20488 25.401160 4.20692 O 15.19102 12.397840 4.20692 C 40.09684 29.761330 4.20692  
C 37.47767 24.230900 4.20692 C 13.81667 14.542640 4.20692 C 40.10308 31.147670 4.20692  
H 36.37475 24.218140 4.20692 C 12.57850 13.871640 4.20692 C 39.61144 23.009700 4.20692  
H 36.73279 29.229240 4.20692 C 11.37661 14.562860 4.20692 C 39.59827 25.402270 4.20692  
H 36.74183 31.705120 4.20692 C 11.35170 15.966250 4.20692 C 40.32484 24.231090 4.20692  
B 43.90249 18.872420 4.20692 C 18.67426 10.918340 4.20692 H 41.42768 24.212740 4.20692  
O 43.82324 20.269270 4.20692 C 16.60884 12.126060 4.20692 H 41.05642 29.218890 4.20692  
C 45.19762 18.124500 4.20692 C 17.25968 10.911120 4.20692 H 41.06081 31.696560 4.20692  
C 46.43579 18.795510 4.20692 H 16.72322 9.947084 4.20692 O 25.03238 12.395980 4.20692  
C 47.63766 18.104260 4.20692 H 12.56423 12.769150 4.20692 C 27.64881 13.867990 4.20692  
C 10.07958 16.700860 4.20692 H 10.42108 14.010230 4.20692 C 28.84925 14.561720 4.20692  
C 40.34003 21.748800 4.20692 B 25.11368 13.792480 4.20692 C 21.55103 10.918310 4.20692  
C 42.40542 20.541050 4.20692 O 23.86512 14.424330 4.20692 C 23.61502 12.126620 4.20692  
C 41.75463 21.755990 4.20692 C 26.41004 14.537760 4.20692 C 22.96539 10.911610 4.20692  
H 42.29106 22.720060 4.20692 C 26.44525 15.945260 4.20692 H 23.50609 9.950241 4.20692  
H 46.45004 19.897970 4.20692 C 27.64293 16.643450 4.20692 H 27.66569 12.765530 4.20692  
H 11.01017 18.656920 4.20692 C 28.87201 15.965410 4.20692 H 29.80572 14.010780 4.20692  
B 33.90059 18.874630 4.20692 C 20.84068 12.148490 4.20692 O 16.36098 14.424720 4.20692  
O 35.14915 18.242780 4.20692 C 22.91908 13.333790 4.20692 C 13.77905 15.950470 4.20692  
C 32.60424 18.129350 4.20692 C 21.54152 13.377170 4.20692 C 12.57970 16.646080 4.20692  
C 32.56902 16.721850 4.20692 H 20.97390 14.322850 4.20692 C 19.38441 12.148620 4.20692  
C 31.37135 16.023670 4.20692 H 25.49585 16.505310 4.20692 C 17.30556 13.333000 4.20692  
C 30.14229 16.701740 4.20692 H 27.63955 17.747300 4.20692 C 18.68315 13.377170 4.20692  
C 38.17361 20.518660 4.20692 O 33.98188 20.271130 4.20692 H 19.24957 14.323890 4.20692  
C 36.09523 19.333330 4.20692 C 31.36549 18.799150 4.20692 H 14.72682 16.513870 4.20692  
C 37.47276 19.289970 4.20692 C 30.16503 18.105400 4.20692 H 12.58064 17.749970 4.20692  
H 38.04037 18.344260 4.20692 C 37.46323 21.748800 4.20692 O 18.94501 5.900183 4.20692  
H 33.51844 16.161830 4.20692 C 35.39928 20.540500 4.20692 C 18.91743 2.905814 4.20692  
H 31.37475 14.919810 4.20692 C 36.04889 21.755540 4.20692 C 18.91121 1.519471 4.20692  
B 20.11661 5.135015 4.20692 H 35.50821 22.716910 4.20692 C 19.40283 9.657408 4.20692  
O 21.28521 5.903926 4.20692 H 31.34859 19.901580 4.20692 C 19.41599 7.264849 4.20692  
C 20.11903 3.639735 4.20692 H 29.20858 18.656370 4.20692 C 18.68943 8.436018 4.20692  
C 21.31819 2.901485 4.20692 O 42.65328 18.242390 4.20692 H 17.58661 8.454407 4.20692  
C 21.31721 1.515012 4.20692 C 45.23524 16.716680 4.20692 H 17.95786 3.448223 4.20692  
C 20.11277 0.793784 4.20692 C 46.43460 16.021030 4.20692 H 17.95345 0.970551 4.20692  
c 0.00000 0.00000 6.82632 serrated armchair

## COF-8

### Layer I AA, AB, inclined zigzag & armchair, and serrated zigzag & armchair

C 25.85511 6.863348 7.860975 C 16.93204 15.12143 7.789575 C 12.00871 9.051265 7.980750  
C 4.564046 7.551417 7.906900 C 17.67002 16.28532 7.798175 C 10.76552 9.712545 7.984575  
C 27.04152 8.953955 7.932275 C 19.76935 12.61187 7.842400 C 9.568823 9.011315 7.998150  
C 25.83477 9.636429 7.915000 C 19.04838 11.38808 7.839901 H 4.968770 0.593880 7.773575  
C 24.60197 8.957348 7.872050 C 17.59200 11.40208 7.842575 H 9.290070 0.621960 7.924825  
C 24.65039 7.550442 7.845175 C 16.89313 12.63879 7.824075 H 15.82916 15.11616 7.771775  
C 5.845753 6.828019 7.928650 C 19.73875 10.15314 7.840800 H 21.73021 13.56432 7.858100  
C 5.881123 5.428016 7.906675 C 21.11665 10.18468 7.845775 H 19.16490 9.211218 7.837525





|   |          |          |         |   |          |          |         |
|---|----------|----------|---------|---|----------|----------|---------|
| C | 12.35196 | 12.49558 | 0.81744 | H | 16.43449 | 9.807772 | 0.86739 |
| C | 11.62342 | 11.32585 | 0.80941 | H | 12.17483 | 5.437313 | 0.84011 |
| C | 10.19080 | 8.853007 | 0.80986 | H | 9.654883 | 9.817066 | 0.80283 |
| C | 9.538543 | 7.639046 | 0.81301 | H | 13.90248 | 5.434823 | 0.83509 |
| C | 10.23402 | 6.431499 | 0.82308 | H | 10.52053 | 11.31154 | 0.79376 |
| C | 11.61116 | 6.385260 | 0.83086 | H | 15.57334 | 11.30425 | 0.86594 |
| O | 4.353760 | 0.823440 | 0.80971 | H | 5.508854 | 6.994033 | 0.84209 |
| B | 5.523970 | 1.589210 | 0.82696 | H | 3.367370 | 3.256520 | 0.84836 |
| O | 6.693240 | 0.821640 | 0.84359 | H | 7.675120 | 3.271100 | 0.81209 |

Transformation Matrix

|          |           |           |          |                   |
|----------|-----------|-----------|----------|-------------------|
| <b>a</b> | 15.052800 | 0.000000  | 0.000000 |                   |
| <b>b</b> | 7.526400  | 13.036110 | 0.000000 |                   |
| <b>c</b> | 0.000000  | 0.000000  | 3.480887 | AA                |
| <b>c</b> | 1.198595  | 0.692009  | 3.396059 | inclined zigzag   |
| <b>c</b> | 1.387745  | 0.000000  | 3.402900 | inclined armchair |

**Layer II AB stacking**

|          |          |          |          |    |          |          |         |
|----------|----------|----------|----------|----|----------|----------|---------|
| C        | 23.42203 | 13.19069 | 4.13016  | O  | 16.81517 | 9.686385 | 4.09571 |
| C        | 22.00782 | 13.18531 | 4.11854  | B  | 15.56683 | 10.31718 | 4.08931 |
| C        | 21.29617 | 11.95596 | 4.11021  | O  | 15.64697 | 11.71354 | 4.07946 |
| C        | 21.99559 | 10.72648 | 4.11186  | O  | 24.31672 | 9.676413 | 4.11733 |
| C        | 23.37297 | 10.76893 | 4.12051  | B  | 25.56607 | 10.30539 | 4.12323 |
| C        | 24.07097 | 11.97502 | 4.12996  | O  | 25.48810 | 11.70174 | 4.13318 |
| C        | 19.84026 | 11.95802 | 4.09851  | C  | 13.04819 | 7.430559 | 4.09818 |
| C        | 19.13159 | 13.18912 | 4.08796  | C  | 11.84719 | 8.156409 | 4.10996 |
| C        | 19.86136 | 14.44905 | 4.09116  | C  | 11.80993 | 9.559170 | 4.11456 |
| C        | 21.28169 | 14.44726 | 4.11024  | C  | 13.03893 | 10.23650 | 4.10703 |
| C        | 21.99684 | 15.66764 | 4.11858  | C  | 14.27225 | 9.567360 | 4.09513 |
| C        | 21.27174 | 16.83949 | 4.10644  | C  | 14.24429 | 8.164299 | 4.09116 |
| C        | 19.87836 | 16.84095 | 4.08599  | H  | 23.96089 | 14.15314 | 4.13594 |
| C        | 19.14982 | 15.67122 | 4.07796  | H  | 19.70123 | 9.782682 | 4.10866 |
| C        | 17.71720 | 13.19838 | 4.07841  | H  | 17.18128 | 14.16244 | 4.07138 |
| C        | 17.06494 | 11.98442 | 4.08156  | H  | 21.42888 | 9.780192 | 4.10364 |
| C        | 17.76042 | 10.77687 | 4.09163  | H  | 18.04693 | 15.65691 | 4.06231 |
| C        | 19.13756 | 10.73063 | 4.09941  | H  | 23.09974 | 15.64962 | 4.13449 |
| O        | 11.88016 | 5.168809 | 4.07826  | H  | 13.03525 | 11.33940 | 4.11064 |
| B        | 13.05037 | 5.934579 | 4.09551  | H  | 10.89377 | 7.601890 | 4.11691 |
| O        | 14.21964 | 5.167009 | 4.11214  | H  | 15.20152 | 7.616469 | 4.08064 |
| <b>c</b> | 0.00000  | 0.00000  | 6.537105 | AB |          |          |         |

**Layer II serrated zigzag**

|   |           |           |         |   |           |           |         |
|---|-----------|-----------|---------|---|-----------|-----------|---------|
| C | 17.094220 | 9.537325  | 4.27655 | O | 10.487370 | 6.033025  | 4.24210 |
| C | 15.680010 | 9.531954  | 4.26493 | B | 9.239022  | 6.663816  | 4.23570 |
| C | 14.968360 | 8.302597  | 4.25660 | O | 9.319168  | 8.060178  | 4.22585 |
| C | 15.667780 | 7.073123  | 4.25825 | O | 17.988920 | 6.023052  | 4.26372 |
| C | 17.045160 | 7.115569  | 4.26690 | B | 4.185460  | 6.652031  | 4.26962 |
| C | 17.743170 | 8.321655  | 4.27635 | O | 19.160290 | 8.048380  | 4.27957 |
| C | 13.512450 | 8.304657  | 4.24490 | C | 6.720385  | 3.777199  | 4.24457 |
| C | 12.803790 | 9.535761  | 4.23435 | C | 5.519388  | 4.503049  | 4.25635 |
| C | 13.533560 | 10.795690 | 4.23755 | C | 5.482128  | 5.905809  | 4.26095 |
| C | 14.953890 | 10.793900 | 4.25663 | C | 6.711122  | 6.583135  | 4.25342 |
| C | 15.669030 | 12.014280 | 4.26497 | C | 7.944448  | 5.913999  | 4.24152 |
| C | 7.417540  | 0.150020  | 4.25283 | C | 7.916488  | 4.510939  | 4.23755 |
| C | 6.024160  | 0.151480  | 4.23238 | H | 17.633090 | 10.499780 | 4.28233 |
| C | 12.822010 | 12.017860 | 4.22435 | H | 13.373430 | 6.129322  | 4.25505 |
| C | 11.389390 | 9.545016  | 4.22480 | H | 10.853480 | 10.509080 | 4.21777 |

|   |           |          |         |                 |           |           |         |
|---|-----------|----------|---------|-----------------|-----------|-----------|---------|
| C | 10.737140 | 8.331055 | 4.22795 | H               | 15.101080 | 6.126832  | 4.25003 |
| C | 11.432620 | 7.123508 | 4.23802 | H               | 11.719120 | 12.003550 | 4.20870 |
| C | 12.809760 | 7.077269 | 4.24580 | H               | 16.771930 | 11.996260 | 4.28088 |
| O | 5.552355  | 1.515449 | 4.22465 | H               | 6.707449  | 7.686042  | 4.25703 |
| B | 6.722565  | 2.281219 | 4.24190 | H               | 4.565965  | 3.948529  | 4.26330 |
| O | 7.891835  | 1.513649 | 4.25853 | H               | 8.873714  | 3.963109  | 4.22703 |
| c | 0.00000   | 0.00000  | 6.82988 | serrated zigzag |           |           |         |

**Layer II serrated armchair**

|   |           |           |         |                   |           |           |         |
|---|-----------|-----------|---------|-------------------|-----------|-----------|---------|
| C | 17.283370 | 8.845316  | 4.27996 | O                 | 10.676520 | 5.341016  | 4.24551 |
| C | 15.869160 | 8.839945  | 4.26834 | B                 | 9.428172  | 5.971807  | 4.23911 |
| C | 15.157510 | 7.610588  | 4.26001 | O                 | 9.508318  | 7.368169  | 4.22926 |
| C | 15.856930 | 6.381114  | 4.26166 | O                 | 3.125270  | 5.331043  | 4.26713 |
| C | 17.234310 | 6.423560  | 4.27031 | B                 | 4.374610  | 5.960022  | 4.27303 |
| C | 17.932320 | 7.629647  | 4.27976 | O                 | 4.296640  | 7.356371  | 4.28298 |
| C | 13.701600 | 7.612648  | 4.24831 | C                 | 6.909535  | 3.085190  | 4.24798 |
| C | 12.992940 | 8.843752  | 4.23776 | C                 | 5.708538  | 3.811040  | 4.25976 |
| C | 13.722700 | 10.103680 | 4.24096 | C                 | 5.671278  | 5.213800  | 4.26436 |
| C | 15.143030 | 10.101890 | 4.26004 | C                 | 6.900272  | 5.891126  | 4.25683 |
| C | 15.858180 | 11.322270 | 4.26838 | C                 | 8.133598  | 5.221990  | 4.24493 |
| C | 15.133090 | 12.494120 | 4.25624 | C                 | 8.105639  | 3.818930  | 4.24096 |
| C | 13.739710 | 12.495580 | 4.23579 | H                 | 17.822240 | 9.807772  | 4.28574 |
| C | 13.011160 | 11.325850 | 4.22776 | H                 | 13.562580 | 5.437313  | 4.25846 |
| C | 11.578540 | 8.853007  | 4.22821 | H                 | 11.042630 | 9.817066  | 4.22118 |
| C | 10.926290 | 7.639046  | 4.23136 | H                 | 15.290230 | 5.434823  | 4.25344 |
| C | 11.621770 | 6.431499  | 4.24143 | H                 | 11.908270 | 11.311540 | 4.21211 |
| C | 12.998910 | 6.385260  | 4.24921 | H                 | 16.961090 | 11.304250 | 4.28429 |
| O | 5.741505  | 0.823440  | 4.22806 | H                 | 6.896599  | 6.994033  | 4.26044 |
| B | 6.911715  | 1.589210  | 4.24531 | H                 | 4.755115  | 3.256520  | 4.26671 |
| O | 8.080985  | 0.821640  | 4.26194 | H                 | 9.062865  | 3.271100  | 4.23044 |
| c | 0.00000   | 0.00000   | 6.83669 | serrated armchair |           |           |         |

**TP COF**

**Layer I AA, AB, inclined zigzag & armchair, and serrated zigzag & armchair**

|   |          |          |           |   |          |           |           |   |          |           |           |
|---|----------|----------|-----------|---|----------|-----------|-----------|---|----------|-----------|-----------|
| C | 34.39868 | 29.87646 | 0.8851000 | C | 24.37890 | 16.82335  | 1.032600  | B | 11.84997 | 13.94665  | 0.9876250 |
| C | 36.83124 | 31.28005 | 0.9077250 | C | 25.61187 | 16.11050  | 1.034250  | C | 16.85226 | 0.9500470 | 0.8756500 |
| C | 36.80484 | 29.87837 | 0.9170500 | C | 25.60210 | 14.68645  | 1.042625  | C | 18.08207 | 1.668191  | 0.8882250 |
| C | 35.60217 | 29.15006 | 0.9062250 | C | 24.37281 | 14.01387  | 1.039150  | C | 18.05348 | 3.069575  | 0.8809500 |
| H | 33.44363 | 29.32625 | 0.8758000 | C | 23.14563 | 14.69843  | 1.027075  | C | 16.84923 | 3.794051  | 0.8623500 |
| C | 36.31152 | 23.12550 | 0.9099250 | H | 24.36958 | 12.91163  | 1.040475  | C | 15.64649 | 3.067074  | 0.8480500 |
| C | 37.02438 | 24.34742 | 0.9158250 | H | 22.22370 | 16.65756  | 1.022275  | C | 15.62094 | 1.665626  | 0.8540750 |
| C | 38.45328 | 21.86251 | 0.9374750 | C | 28.04238 | 14.66603  | 1.033025  | H | 19.00718 | 3.622121  | 0.8918250 |
| C | 36.29857 | 25.51970 | 0.9156250 | C | 26.86112 | 13.99045  | 1.046875  | H | 14.69127 | 3.617120  | 0.8324500 |
| C | 34.89022 | 23.12622 | 0.9052000 | H | 26.85656 | 12.88845  | 1.058825  | C | 19.31136 | 0.9209210 | 0.9099000 |
| C | 34.16021 | 21.86543 | 0.9001500 | H | 28.99457 | 14.11092  | 1.033850  | H | 20.26561 | 1.472396  | 0.9195500 |
| C | 34.87082 | 20.63552 | 0.8890250 | H | 37.76038 | 29.32940  | 0.9335250 | H | 20.24120 | 10.10662  | 0.9359750 |
| C | 36.32595 | 20.63432 | 0.8965750 | H | 38.99637 | 22.82239  | 0.9526250 | H | 19.37732 | 8.607212  | 0.8973250 |
| C | 37.03899 | 21.86257 | 0.9123750 | H | 38.12735 | 24.33161  | 0.9198250 | H | 14.32416 | 8.609713  | 0.8674250 |
| C | 34.17387 | 19.40526 | 0.8849000 | H | 36.45034 | 18.45755  | 0.8907000 | H | 13.46097 | 10.10351  | 0.9084250 |
| C | 37.02020 | 19.40224 | 0.9024250 | H | 34.74218 | 18.45969  | 0.8769500 | H | 17.71272 | 14.48212  | 0.9219500 |
| C | 32.79719 | 19.44526 | 0.8987000 | H | 33.07544 | 24.33291  | 0.9043250 | H | 15.98495 | 14.48153  | 0.9239750 |
| C | 32.74545 | 21.86793 | 0.9114750 | H | 32.20335 | 22.82837  | 0.9240000 | C | 41.87809 | 18.21613  | 1.031250  |
| C | 34.17826 | 24.34885 | 0.9069750 | C | 14.39298 | 0.9160510 | 0.8412250 | C | 43.10454 | 18.90112  | 1.055425  |
| C | 32.09827 | 20.65075 | 0.9128750 | H | 13.43777 | 1.465609  | 0.8237000 | C | 44.33380 | 18.22957  | 1.074325  |
| C | 34.90507 | 25.52051 | 0.9113000 | C | 17.57832 | 12.30619  | 0.9074750 | C | 44.34391 | 16.80553  | 1.069575  |







|   |          |          |          |                 |          |          |          |   |          |          |          |
|---|----------|----------|----------|-----------------|----------|----------|----------|---|----------|----------|----------|
| C | 26.80170 | 19.63189 | 4.427338 | C               | 16.62348 | 14.22858 | 4.331338 | C | 10.52956 | 14.69862 | 4.447888 |
| H | 26.80618 | 20.73396 | 4.420988 | O               | 13.13383 | 13.24522 | 4.376413 | C | 11.75578 | 15.38472 | 4.439813 |
| H | 24.66875 | 19.51175 | 4.443713 | O               | 14.30089 | 15.27351 | 4.381363 | C | 11.72480 | 16.78935 | 4.463563 |
| H | 33.38972 | 32.16904 | 4.253988 | B               | 23.05199 | 14.64764 | 4.412438 | H | 10.53427 | 13.59642 | 4.432488 |
| C | 24.37959 | 16.79808 | 4.441713 | B               | 18.05228 | 5.98490  | 4.275988 | H | 12.67721 | 17.34420 | 4.460763 |
| c | 0.00000  | 0.00000  | 6.82538  | serrated zigzag |          |          |          |   |          |          |          |

## Layer II serrated armchair

|   |          |           |          |                   |          |           |          |   |          |           |          |
|---|----------|-----------|----------|-------------------|----------|-----------|----------|---|----------|-----------|----------|
| C | 35.78503 | 29.876460 | 4.301190 | C                 | 25.76525 | 16.823350 | 4.448690 | B | 13.23631 | 13.946650 | 4.403715 |
| C | 38.21759 | 31.280050 | 4.323815 | C                 | 26.99821 | 16.110500 | 4.450340 | C | 18.23861 | 0.950047  | 4.291740 |
| C | 38.19118 | 29.878370 | 4.333140 | C                 | 26.98845 | 14.686450 | 4.458715 | C | 19.46841 | 1.668191  | 4.304315 |
| C | 36.98851 | 29.150060 | 4.322315 | C                 | 25.75916 | 14.013870 | 4.455240 | C | 19.43983 | 3.069575  | 4.297040 |
| H | 34.82998 | 29.326250 | 4.291890 | C                 | 24.53197 | 14.698430 | 4.443165 | C | 18.23557 | 3.794051  | 4.278440 |
| C | 37.69786 | 23.125500 | 4.326015 | H                 | 25.75592 | 12.911630 | 4.456565 | C | 17.03284 | 3.067074  | 4.264140 |
| C | 38.41072 | 24.347420 | 4.331915 | H                 | 23.61004 | 16.657560 | 4.438365 | C | 17.00729 | 1.665626  | 4.270165 |
| C | 39.83963 | 21.862510 | 4.353565 | C                 | 29.42872 | 14.666030 | 4.449115 | H | 20.39352 | 3.622121  | 4.307915 |
| C | 37.68491 | 25.519700 | 4.331715 | C                 | 28.24747 | 13.990450 | 4.462965 | H | 16.07762 | 3.617120  | 4.248540 |
| C | 36.27657 | 23.126220 | 4.321290 | H                 | 28.24290 | 12.888450 | 4.474915 | C | 20.69770 | 0.920921  | 4.325990 |
| C | 35.54655 | 21.865430 | 4.316240 | H                 | 30.38091 | 14.110920 | 4.449940 | H | 21.65195 | 1.472396  | 4.335640 |
| C | 36.25716 | 20.635520 | 4.305115 | H                 | 39.14672 | 29.329400 | 4.349615 | H | 21.62754 | 10.106620 | 4.352065 |
| C | 37.71230 | 20.634320 | 4.312665 | H                 | 40.38271 | 22.822390 | 4.368715 | H | 20.76366 | 8.607212  | 4.313415 |
| C | 38.42533 | 21.862570 | 4.328465 | H                 | 39.51369 | 24.331610 | 4.335915 | H | 15.71050 | 8.609713  | 4.283515 |
| C | 35.56021 | 19.405260 | 4.300990 | H                 | 37.83669 | 18.457550 | 4.306790 | H | 14.84731 | 10.103510 | 4.324515 |
| C | 38.40654 | 19.402240 | 4.318515 | H                 | 36.12852 | 18.459690 | 4.293040 | H | 19.09907 | 14.482120 | 4.338040 |
| C | 34.18354 | 19.445260 | 4.314790 | H                 | 34.46178 | 24.332910 | 4.320415 | H | 17.37130 | 14.481530 | 4.340065 |
| C | 34.13179 | 21.867930 | 4.327565 | H                 | 33.58969 | 22.828370 | 4.340090 | C | 43.26443 | 18.216130 | 4.447340 |
| C | 35.56461 | 24.348850 | 4.323065 | C                 | 15.77932 | 0.916051  | 4.257315 | C | 44.49089 | 18.901120 | 4.471515 |
| C | 33.48462 | 20.650750 | 4.328965 | H                 | 14.82411 | 1.465609  | 4.239790 | C | 45.72015 | 18.229570 | 4.490415 |
| C | 36.29142 | 25.520510 | 4.327390 | C                 | 18.96466 | 12.306190 | 4.323565 | C | 45.73026 | 16.805530 | 4.485665 |
| O | 32.06821 | 20.373810 | 4.351615 | C                 | 19.66499 | 13.535160 | 4.340090 | C | 44.49751 | 16.092090 | 4.472665 |
| O | 33.24382 | 18.350590 | 4.327990 | C                 | 21.04210 | 13.491480 | 4.364040 | C | 43.29480 | 16.811110 | 4.453390 |
| O | 38.15805 | 26.884810 | 4.333990 | C                 | 21.73890 | 12.284530 | 4.369540 | H | 44.48582 | 20.003290 | 4.469990 |
| O | 35.81924 | 26.885520 | 4.326165 | C                 | 21.08921 | 11.069430 | 4.348090 | H | 42.34274 | 16.255770 | 4.437690 |
| B | 31.99375 | 18.977010 | 4.353665 | O                 | 21.98645 | 14.583000 | 4.392590 | C | 40.48441 | 20.644130 | 4.365190 |
| B | 36.98880 | 27.653640 | 4.328765 | O                 | 23.15591 | 12.556470 | 4.402640 | C | 39.78318 | 19.439870 | 4.347015 |
| C | 39.44566 | 32.030140 | 4.335390 | C                 | 17.50838 | 12.305930 | 4.318590 | O | 41.89991 | 20.364100 | 4.403290 |
| H | 40.40133 | 31.481590 | 4.352565 | C                 | 16.79930 | 11.075150 | 4.312365 | O | 40.72028 | 18.343410 | 4.372590 |
| C | 25.80367 | 18.261520 | 4.443340 | C                 | 17.52748 | 9.814229  | 4.300890 | B | 41.97128 | 18.967010 | 4.408990 |
| C | 35.75684 | 31.277940 | 4.290115 | C                 | 18.94783 | 9.813969  | 4.308765 | C | 46.97842 | 18.926320 | 4.506915 |
| C | 36.98669 | 31.996050 | 4.301665 | C                 | 19.67508 | 11.076050 | 4.325190 | C | 9.47283  | 16.099490 | 4.484790 |
| C | 34.52737 | 32.025300 | 4.267065 | C                 | 16.81353 | 8.593088  | 4.288115 | C | 44.53635 | 14.653920 | 4.472265 |
| C | 28.23392 | 16.817180 | 4.436665 | C                 | 17.53979 | 7.421854  | 4.284115 | H | 43.58459 | 14.098060 | 4.469115 |
| C | 29.46688 | 16.104040 | 4.430815 | C                 | 18.93336 | 7.421431  | 4.293015 | C | 10.70522 | 16.813420 | 4.488090 |
| C | 30.66949 | 16.822830 | 4.404040 | C                 | 19.66056 | 8.592146  | 4.305115 | C | 10.66660 | 18.251390 | 4.505640 |
| C | 30.69954 | 18.227690 | 4.384690 | O                 | 17.06614 | 6.058103  | 4.274290 | H | 11.61836 | 18.807060 | 4.515040 |
| C | 29.47297 | 18.912880 | 4.397390 | O                 | 19.40565 | 6.056999  | 4.289890 | H | 46.97284 | 20.028300 | 4.517290 |
| C | 28.24372 | 18.241260 | 4.422390 | C                 | 15.38498 | 11.066670 | 4.325940 | C | 9.48312  | 14.675450 | 4.471490 |
| H | 31.62172 | 16.267400 | 4.396490 | C                 | 14.73407 | 12.281060 | 4.348565 | C | 8.22453  | 13.978730 | 4.471865 |
| H | 29.47874 | 20.015110 | 4.384040 | C                 | 15.42947 | 13.488590 | 4.351715 | H | 8.22973  | 12.876560 | 4.468365 |
| C | 26.98487 | 18.937230 | 4.430740 | C                 | 16.80664 | 13.533920 | 4.334740 | C | 10.71272 | 14.003960 | 4.451290 |
| H | 26.98935 | 20.039300 | 4.424390 | O                 | 13.31699 | 12.550560 | 4.379815 | C | 11.93894 | 14.690060 | 4.443215 |
| H | 24.85191 | 18.817090 | 4.447115 | O                 | 14.48405 | 14.578850 | 4.384765 | C | 11.90796 | 16.094690 | 4.466965 |
| H | 33.57288 | 31.474380 | 4.257390 | B                 | 23.23516 | 13.952980 | 4.415840 | H | 10.71743 | 12.901760 | 4.435890 |
| C | 24.56276 | 16.103420 | 4.445115 | B                 | 18.23545 | 5.290247  | 4.279390 | H | 12.86036 | 16.649540 | 4.464165 |
| c | 0.00000  | 0.00000   | 6.83218  | serrated armchair |          |           |          |   |          |           |          |

## COF-4M

### Layer I AA, AB, inclined zigzag & armchair, serrated zigzag & armchair

|   |          |          |           |   |          |          |           |
|---|----------|----------|-----------|---|----------|----------|-----------|
| C | 16.65795 | 14.57413 | 0.8662960 | O | 11.20571 | 9.554735 | 0.8149160 |
| C | 16.69869 | 15.98028 | 0.8642160 | O | 8.386591 | 14.42251 | 0.9112960 |
| C | 15.46072 | 16.64832 | 0.8602260 | B | 28.85009 | 13.79134 | 0.9119460 |
| C | 14.25893 | 15.95477 | 0.8594960 | B | 12.92274 | 13.79939 | 0.8610660 |
| C | 14.21803 | 14.54852 | 0.8606960 | B | 10.03714 | 8.786865 | 0.8151160 |
| C | 15.45619 | 13.88052 | 0.8633260 | C | 26.31219 | 16.63906 | 0.9244460 |
| H | 15.44348 | 17.75057 | 0.8584760 | C | 25.07378 | 15.97165 | 0.9219960 |
| H | 13.31323 | 16.52131 | 0.8566460 | C | 25.11413 | 14.56548 | 0.9248460 |
| H | 15.47330 | 12.77820 | 0.8640760 | C | 26.31559 | 13.87148 | 0.9253160 |
| H | 17.60369 | 14.00774 | 0.8695460 | C | 27.55387 | 14.53887 | 0.9241960 |
| C | 11.23588 | 6.552347 | 0.7979460 | C | 27.51373 | 15.94491 | 0.9261160 |
| C | 10.03838 | 7.290568 | 0.8001260 | H | 24.16820 | 13.99940 | 0.9243960 |
| C | 8.840971 | 6.552197 | 0.7960960 | H | 26.29782 | 12.76925 | 0.9250460 |
| C | 8.840961 | 5.164634 | 0.7951960 | H | 28.45984 | 16.51109 | 0.9265760 |
| C | 10.03848 | 4.426489 | 0.7995760 | H | 26.33001 | 17.74158 | 0.9237460 |
| C | 11.23590 | 5.164728 | 0.7984960 | C | 9.340211 | 0.795383 | 0.8400960 |
| H | 7.877671 | 7.088386 | 0.7953460 | C | 19.49931 | 18.39517 | 0.8532960 |
| H | 7.877801 | 4.628389 | 0.7937660 | C | 20.19245 | 17.19146 | 0.8764660 |
| H | 12.19921 | 4.628671 | 0.8001960 | C | 21.58226 | 17.18971 | 0.8876260 |
| H | 12.19940 | 7.088141 | 0.7988760 | C | 22.27837 | 18.39192 | 0.8747960 |
| C | 10.72633 | 13.33004 | 0.8750660 | C | 10.72945 | 0.793766 | 0.8504260 |
| C | 9.336611 | 13.32796 | 0.8885460 | O | 19.24258 | 16.09653 | 0.8840160 |
| C | 8.643501 | 12.12411 | 0.8777660 | O | 22.52935 | 16.09253 | 0.9102460 |
| C | 9.340001 | 10.92161 | 0.8529160 | O | 11.20607 | 2.162620 | 0.8326760 |
| C | 10.72909 | 10.92367 | 0.8395160 | O | 8.867001 | 2.165328 | 0.8159160 |
| C | 11.42252 | 12.12811 | 0.8508760 | O | 23.70144 | 18.11697 | 0.8890960 |
| O | 7.219531 | 12.39550 | 0.8935960 | O | 18.07539 | 18.12346 | 0.8460460 |
| O | 8.866661 | 9.551425 | 0.8371960 | B | 17.99500 | 16.72763 | 0.8650460 |
| O | 12.84555 | 12.40333 | 0.8417960 | B | 10.03749 | 2.930173 | 0.8134960 |
| O | 11.67349 | 14.42733 | 0.8815960 | B | 23.77861 | 16.72083 | 0.9089960 |

#### Transformation Matrix

|          |           |           |          |                   |
|----------|-----------|-----------|----------|-------------------|
| <b>a</b> | 21.711180 | 0.000000  | 0.000000 |                   |
| <b>b</b> | 10.855590 | 18.802430 | 0.000000 |                   |
| <b>c</b> | 0.000000  | 0.000000  | 3.505078 | AA                |
| <b>c</b> | 1.19747   | 0.691360  | 3.437101 | inclined zigzag   |
| <b>c</b> | 1.38958   | 0.000000  | 3.45078  | inclined armchair |

### Layer II AB stacking

|   |          |          |          |   |          |          |          |
|---|----------|----------|----------|---|----------|----------|----------|
| C | 27.51354 | 20.84161 | 4.048914 | O | 22.06130 | 15.82221 | 3.997534 |
| C | 27.55428 | 22.24776 | 4.046834 | O | 19.24218 | 20.68999 | 4.093914 |
| C | 26.31631 | 22.91580 | 4.042844 | B | 39.70568 | 20.05882 | 4.094564 |
| C | 25.11452 | 22.22225 | 4.042114 | B | 23.77833 | 20.06687 | 4.043684 |
| C | 25.07362 | 20.81600 | 4.043314 | B | 20.89273 | 15.05434 | 3.997734 |
| C | 26.31178 | 20.14800 | 4.045944 | C | 37.16778 | 22.90654 | 4.107064 |
| H | 26.29907 | 24.01805 | 4.041094 | C | 35.92937 | 22.23913 | 4.104614 |
| H | 24.16882 | 22.78879 | 4.039264 | C | 35.96972 | 20.83296 | 4.107464 |
| H | 26.32889 | 19.04568 | 4.046694 | C | 37.17118 | 20.13896 | 4.107934 |
| H | 28.45928 | 20.27522 | 4.052164 | C | 38.40946 | 20.80635 | 4.106814 |
| C | 22.09147 | 12.81983 | 3.980564 | C | 38.36932 | 22.21239 | 4.108734 |
| C | 20.89397 | 13.55805 | 3.982744 | H | 35.02379 | 20.26688 | 4.107014 |
| C | 19.69656 | 12.81968 | 3.978714 | H | 37.15341 | 19.03673 | 4.107664 |
| C | 19.69655 | 11.43211 | 3.977814 | H | 39.31543 | 22.77857 | 4.109194 |

|   |          |          |          |    |          |          |          |
|---|----------|----------|----------|----|----------|----------|----------|
| C | 20.89407 | 10.69397 | 3.982194 | H  | 37.18560 | 24.00906 | 4.106364 |
| C | 22.09149 | 11.43221 | 3.981114 | C  | 20.19580 | 7.062861 | 4.022714 |
| H | 18.73326 | 13.35586 | 3.977964 | C  | 30.35490 | 24.66265 | 4.035914 |
| H | 18.73339 | 10.89587 | 3.976384 | C  | 31.04804 | 23.45894 | 4.059084 |
| H | 23.05480 | 10.89615 | 3.982814 | C  | 32.43785 | 23.45719 | 4.070244 |
| H | 23.05499 | 13.35562 | 3.981494 | C  | 33.13396 | 24.65940 | 4.057414 |
| C | 21.58192 | 19.59752 | 4.057684 | C  | 21.58504 | 7.061244 | 4.033044 |
| C | 20.19220 | 19.59544 | 4.071164 | O  | 30.09817 | 22.36401 | 4.066634 |
| C | 19.49909 | 18.39159 | 4.060384 | O  | 33.38494 | 22.36001 | 4.092864 |
| C | 20.19559 | 17.18909 | 4.035534 | O  | 22.06166 | 8.430098 | 4.015294 |
| C | 21.58468 | 17.19115 | 4.022134 | O  | 19.72259 | 8.432806 | 3.998534 |
| C | 22.27811 | 18.39559 | 4.033494 | O  | 34.55703 | 24.38445 | 4.071714 |
| O | 18.07512 | 18.66298 | 4.076214 | O  | 28.93098 | 24.39094 | 4.028664 |
| O | 19.72225 | 15.81890 | 4.019814 | B  | 28.85059 | 22.99511 | 4.047664 |
| O | 23.70114 | 18.67081 | 4.024414 | B  | 20.89308 | 9.197651 | 3.996114 |
| O | 22.52908 | 20.69481 | 4.064214 | B  | 34.63420 | 22.98831 | 4.091614 |
| c | 0.00000  | 0.00000  | 6.36524  | AB |          |          |          |

### Layer II serrated zigzag

|   |          |           |          |                 |          |           |          |
|---|----------|-----------|----------|-----------------|----------|-----------|----------|
| C | 17.85542 | 15.265490 | 4.306816 | O               | 12.40318 | 10.246100 | 4.255436 |
| C | 17.89616 | 16.671640 | 4.304736 | O               | 9.58406  | 15.113870 | 4.351816 |
| C | 16.65819 | 17.339680 | 4.300746 | B               | 30.04756 | 14.482700 | 4.352466 |
| C | 15.45640 | 16.646130 | 4.300016 | B               | 14.12021 | 14.490750 | 4.301586 |
| C | 15.41550 | 15.239880 | 4.301216 | B               | 11.23461 | 9.478226  | 4.255636 |
| C | 16.65366 | 14.571880 | 4.303846 | C               | 27.50966 | 17.330420 | 4.364966 |
| H | 16.64095 | 18.441930 | 4.298996 | C               | 26.27125 | 16.663010 | 4.362516 |
| H | 14.51070 | 17.212670 | 4.297166 | C               | 26.31160 | 15.256840 | 4.365366 |
| H | 16.67077 | 13.469560 | 4.304596 | C               | 27.51306 | 14.562840 | 4.365836 |
| H | 18.80116 | 14.699100 | 4.310066 | C               | 28.75134 | 15.230230 | 4.364716 |
| C | 12.43335 | 7.243707  | 4.238466 | C               | 28.71120 | 16.636270 | 4.366636 |
| C | 11.23585 | 7.981928  | 4.240646 | H               | 25.36567 | 14.690760 | 4.364916 |
| C | 10.03844 | 7.243557  | 4.236616 | H               | 27.49529 | 13.460610 | 4.365566 |
| C | 10.03843 | 5.855994  | 4.235716 | H               | 29.65731 | 17.202450 | 4.367096 |
| C | 11.23595 | 5.117849  | 4.240096 | H               | 27.52748 | 18.432940 | 4.364266 |
| C | 12.43337 | 5.856088  | 4.239016 | C               | 10.53768 | 1.486743  | 4.280616 |
| H | 9.07514  | 7.779746  | 4.235866 | C               | 9.84119  | 0.284100  | 4.293816 |
| H | 9.07527  | 5.319749  | 4.234286 | C               | 21.38992 | 17.882820 | 4.316986 |
| H | 13.39668 | 5.320031  | 4.240716 | C               | 22.77973 | 17.881070 | 4.328146 |
| H | 13.39687 | 7.779501  | 4.239396 | C               | 12.62025 | 0.280850  | 4.315316 |
| C | 11.92380 | 14.021400 | 4.315586 | C               | 11.92692 | 1.485126  | 4.290946 |
| C | 10.53408 | 14.019320 | 4.329066 | O               | 20.44005 | 16.787890 | 4.324536 |
| C | 9.84097  | 12.815470 | 4.318286 | O               | 23.72682 | 16.783890 | 4.350766 |
| C | 10.53747 | 11.612970 | 4.293436 | O               | 12.40354 | 2.853980  | 4.273196 |
| C | 11.92656 | 11.615030 | 4.280036 | O               | 10.06447 | 2.856688  | 4.256436 |
| C | 12.61999 | 12.819470 | 4.291396 | O               | 14.04332 | 0.005900  | 4.329616 |
| O | 8.41700  | 13.086860 | 4.334116 | O               | 8.41727  | 0.012390  | 4.286566 |
| O | 10.06413 | 10.242780 | 4.277716 | B               | 19.19247 | 17.418990 | 4.305566 |
| O | 14.04302 | 13.094690 | 4.282316 | B               | 11.23496 | 3.621533  | 4.254016 |
| O | 12.87096 | 15.118690 | 4.322116 | B               | 24.97608 | 17.412190 | 4.349516 |
| c | 0.00000  | 0.00000   | 6.88104  | serrated zigzag |          |           |          |

### Layer II serrated armchair

|   |           |           |          |   |           |           |          |
|---|-----------|-----------|----------|---|-----------|-----------|----------|
| C | 18.047530 | 14.574130 | 4.310236 | O | 12.595290 | 9.554735  | 4.258856 |
| C | 18.088270 | 15.980280 | 4.308156 | O | 9.776171  | 14.422510 | 4.355236 |
| C | 16.850300 | 16.648320 | 4.304166 | B | 8.528490  | 13.791340 | 4.355886 |
| C | 15.648510 | 15.954770 | 4.303436 | B | 14.312320 | 13.799390 | 4.305006 |

|   |           |           |          |   |           |           |                   |
|---|-----------|-----------|----------|---|-----------|-----------|-------------------|
| C | 15.607610 | 14.548520 | 4.304636 | B | 11.426720 | 8.786865  | 4.259056          |
| C | 16.845770 | 13.880520 | 4.307266 | C | 27.701770 | 16.639060 | 4.368386          |
| H | 16.833060 | 17.750570 | 4.302416 | C | 26.463360 | 15.971650 | 4.365936          |
| H | 14.702810 | 16.521310 | 4.300586 | C | 26.503710 | 14.565480 | 4.368786          |
| H | 16.862880 | 12.778200 | 4.308016 | C | 27.705170 | 13.871480 | 4.369256          |
| H | 18.993270 | 14.007740 | 4.313486 | C | 28.943450 | 14.538870 | 4.368136          |
| C | 12.625460 | 6.552347  | 4.241886 | C | 28.903310 | 15.944910 | 4.370056          |
| C | 11.427960 | 7.290568  | 4.244066 | H | 25.557780 | 13.999400 | 4.368336          |
| C | 10.230550 | 6.552197  | 4.240036 | H | 27.687400 | 12.769250 | 4.368986          |
| C | 10.230540 | 5.164634  | 4.239136 | H | 29.849420 | 16.511090 | 4.370516          |
| C | 11.428060 | 4.426489  | 4.243516 | H | 27.719590 | 17.741580 | 4.367686          |
| C | 12.625480 | 5.164728  | 4.242436 | C | 10.729790 | 0.795383  | 4.284036          |
| H | 9.267251  | 7.088386  | 4.239286 | C | 20.888890 | 18.395170 | 4.297236          |
| H | 9.267381  | 4.628389  | 4.237706 | C | 21.582030 | 17.191460 | 4.320406          |
| H | 13.588790 | 4.628671  | 4.244136 | C | 22.971840 | 17.189710 | 4.331566          |
| H | 13.588980 | 7.088141  | 4.242816 | C | 23.667950 | 18.391920 | 4.318736          |
| C | 12.115910 | 13.330040 | 4.319006 | C | 12.119030 | 0.793766  | 4.294366          |
| C | 10.726190 | 13.327960 | 4.332486 | O | 20.632160 | 16.096530 | 4.327956          |
| C | 10.033080 | 12.124110 | 4.321706 | O | 23.918930 | 16.092530 | 4.354186          |
| C | 10.729580 | 10.921610 | 4.296856 | O | 12.595650 | 2.162620  | 4.276616          |
| C | 12.118670 | 10.923670 | 4.283456 | O | 10.256580 | 2.165328  | 4.259856          |
| C | 12.812100 | 12.128110 | 4.294816 | O | 25.091020 | 18.116970 | 4.333036          |
| O | 8.609111  | 12.395500 | 4.337536 | O | 19.464970 | 18.123460 | 4.289986          |
| O | 10.256240 | 9.551425  | 4.281136 | B | 19.384580 | 16.727630 | 4.308986          |
| O | 14.235130 | 12.403330 | 4.285736 | B | 11.427070 | 2.930173  | 4.257436          |
| O | 13.063070 | 14.427330 | 4.325536 | B | 25.168190 | 16.720830 | 4.352936          |
| c | 0.00000   | 0.00000   | 6.88788  |   |           |           | serrated armchair |

## COF-5M

### Layer I AA, AB, inclined zigzag & armchair, and serrated zigzag & armchair

|   |          |          |           |   |          |          |           |   |          |          |           |
|---|----------|----------|-----------|---|----------|----------|-----------|---|----------|----------|-----------|
| C | 13.01181 | 22.34097 | 0.9135870 | C | 27.58970 | 2.790600 | 0.8839620 | C | 22.23723 | 10.86297 | 1.022137  |
| C | 15.41276 | 23.73070 | 0.9347870 | C | 27.58465 | 1.403850 | 0.8886370 | H | 25.59842 | 12.79208 | 1.050612  |
| C | 15.41148 | 22.34430 | 0.9440870 | H | 30.95196 | 3.323317 | 0.9137120 | H | 23.41300 | 9.062314 | 1.004562  |
| C | 14.21256 | 21.60599 | 0.9334870 | H | 26.62894 | 3.330941 | 0.8722620 | C | 10.05809 | 12.90808 | 0.8579870 |
| H | 41.20082 | 21.80104 | 0.9047870 | O | 31.64852 | 8.606116 | 0.8449620 | C | 8.858518 | 12.21246 | 0.8419870 |
| C | 14.96698 | 15.57696 | 0.9486620 | O | 30.49775 | 10.64400 | 0.8876870 | C | 7.630246 | 12.89205 | 0.8480120 |
| C | 15.64707 | 16.78833 | 0.9593370 | B | 31.73979 | 10.00195 | 0.8538870 | C | 36.80516 | 14.29538 | 0.8685620 |
| C | 14.93871 | 17.98314 | 0.9511120 | O | 26.02376 | 8.666956 | 0.9843370 | C | 8.856944 | 14.98615 | 0.8834870 |
| C | 13.57766 | 15.56085 | 0.9302120 | B | 25.96297 | 10.06458 | 0.9972620 | H | 11.00543 | 12.34449 | 0.8538120 |
| C | 12.86939 | 16.75619 | 0.9236620 | O | 27.21853 | 10.67924 | 0.9731370 | C | 35.50769 | 12.15967 | 0.8380370 |
| C | 13.54972 | 17.96746 | 0.9337370 | O | 17.07419 | 16.53399 | 0.9789870 | H | 37.99348 | 16.08834 | 0.9006370 |
| O | 15.39925 | 19.35711 | 0.9559620 | O | 15.92897 | 14.49269 | 0.9607870 | C | 34.28146 | 12.84275 | 0.8498120 |
| O | 13.05913 | 19.33217 | 0.9269120 | O | 12.64145 | 14.45389 | 0.9142620 | C | 33.08038 | 12.15033 | 0.8502120 |
| B | 14.22106 | 20.11042 | 0.9397870 | O | 11.44886 | 16.46757 | 0.9046370 | C | 33.03878 | 10.74288 | 0.8382120 |
| C | 42.15765 | 23.72782 | 0.9043120 | B | 17.16970 | 15.13879 | 0.9795870 | C | 34.27464 | 10.06875 | 0.8206120 |
| C | 14.20938 | 24.45350 | 0.9143370 | B | 11.38620 | 15.07040 | 0.8991620 | C | 6.328531 | 10.75647 | 0.8206620 |
| H | 16.37365 | 21.80646 | 0.9598370 | C | 18.47296 | 14.40545 | 0.9982620 | H | 32.13431 | 12.71617 | 0.8616120 |
| C | 28.15192 | 9.571300 | 0.9397620 | C | 10.09526 | 14.31548 | 0.8796370 | H | 34.28576 | 8.966738 | 0.8086620 |
| C | 29.54024 | 9.556532 | 0.9030870 | C | 18.52074 | 12.99846 | 0.9926370 | H | 23.46207 | 14.04228 | 1.061062  |
| C | 27.44410 | 8.375884 | 0.9472370 | C | 19.72498 | 12.31243 | 1.006762  | H | 21.27807 | 10.31708 | 1.013437  |
| C | 28.12549 | 7.164942 | 0.9204370 | C | 20.94826 | 13.00050 | 1.027462  | H | 21.86387 | 14.96439 | 1.051237  |
| C | 29.51459 | 7.150704 | 0.8873120 | C | 20.91346 | 14.40361 | 1.035062  | H | 19.73294 | 11.20832 | 1.000262  |
| C | 30.22199 | 8.346423 | 0.8773870 | C | 19.70584 | 15.08559 | 1.020637  | H | 16.36911 | 24.28176 | 0.9433620 |
| O | 27.63679 | 5.798896 | 0.9228870 | H | 17.57731 | 12.42820 | 0.9751370 | H | 1.794930 | 0.846800 | 0.9256120 |
| O | 29.97603 | 5.776882 | 0.8704870 | C | 22.22023 | 12.26659 | 1.034562  | H | 26.62709 | 0.855000 | 0.8810370 |

|   |          |          |           |   |          |          |          |   |          |          |           |
|---|----------|----------|-----------|---|----------|----------|----------|---|----------|----------|-----------|
| B | 28.79922 | 5.021281 | 0.8938120 | H | 19.71152 | 16.18803 | 1.025862 | H | 41.20013 | 24.27656 | 0.8885120 |
| C | 28.78563 | 0.677480 | 0.9047870 | C | 23.45246 | 12.93888 | 1.048287 | H | 35.84981 | 14.84786 | 0.8738370 |
| C | 0.839300 | 1.399460 | 0.9128370 | C | 24.64747 | 12.23470 | 1.042037 | H | 8.859699 | 11.10883 | 0.8255620 |
| C | 29.98927 | 2.786030 | 0.9059120 | C | 24.67650 | 10.82685 | 1.023087 | H | 34.28357 | 13.94647 | 0.8612370 |
| C | 28.79080 | 3.525527 | 0.8927620 | C | 23.43431 | 10.16420 | 1.017012 | H | 7.281887 | 10.20058 | 0.8091370 |

**Transformation Matrix**

|          |           |           |          |                   |
|----------|-----------|-----------|----------|-------------------|
| <b>a</b> | 29.150180 | 0.000000  | 0.000000 |                   |
| <b>b</b> | 14.575090 | 25.244790 | 0.000000 |                   |
| <b>c</b> | 0.000000  | 0.000000  | 3.504000 | AA                |
| <b>c</b> | 1.19993   | 0.69278   | 3.433682 | inclined zigzag   |
| <b>c</b> | 1.38905   | 0.00000   | 3.43368  | inclined armchair |

**Layer II AB stacking**

|          |          |          |          |    |          |          |          |   |          |          |          |
|----------|----------|----------|----------|----|----------|----------|----------|---|----------|----------|----------|
| C        | 27.58690 | 30.75590 | 4.091712 | C  | 42.16479 | 11.20553 | 4.062087 | C | 36.81232 | 19.27790 | 4.200262 |
| C        | 29.98785 | 32.14563 | 4.112912 | C  | 42.15974 | 9.818782 | 4.066762 | H | 40.17351 | 21.20701 | 4.228737 |
| C        | 29.98657 | 30.75923 | 4.122212 | H  | 45.52705 | 11.73825 | 4.091837 | H | 37.98809 | 17.47725 | 4.182687 |
| C        | 28.78765 | 30.02092 | 4.111612 | H  | 41.20403 | 11.74587 | 4.050387 | C | 24.63318 | 21.32301 | 4.036112 |
| H        | 55.77591 | 30.21597 | 4.082912 | O  | 46.22361 | 17.02105 | 4.023087 | C | 23.43361 | 20.62739 | 4.020112 |
| C        | 29.54207 | 23.99189 | 4.126787 | O  | 45.07284 | 19.05893 | 4.065812 | C | 22.20534 | 21.30698 | 4.026137 |
| C        | 30.22216 | 25.20326 | 4.137462 | B  | 46.31488 | 18.41688 | 4.032012 | C | 51.38025 | 22.71031 | 4.046687 |
| C        | 29.51380 | 26.39807 | 4.129237 | O  | 40.59885 | 17.08189 | 4.162462 | C | 23.43203 | 23.40108 | 4.061612 |
| C        | 28.15275 | 23.97578 | 4.108337 | B  | 40.53806 | 18.47951 | 4.175387 | H | 25.58052 | 20.75942 | 4.031937 |
| C        | 27.44448 | 25.17112 | 4.101787 | O  | 41.79362 | 19.09417 | 4.151262 | C | 50.08278 | 20.57460 | 4.016162 |
| C        | 28.12481 | 26.38239 | 4.111862 | O  | 31.64928 | 24.94892 | 4.157112 | H | 52.56857 | 24.50327 | 4.078762 |
| O        | 29.97434 | 27.77204 | 4.134087 | O  | 30.50406 | 22.90762 | 4.138912 | C | 48.85655 | 21.25768 | 4.027937 |
| O        | 27.63422 | 27.74710 | 4.105037 | O  | 27.21654 | 22.86882 | 4.092387 | C | 47.65547 | 20.56526 | 4.028337 |
| B        | 28.79615 | 28.52535 | 4.117912 | O  | 26.02395 | 24.88250 | 4.082762 | C | 47.61387 | 19.15781 | 4.016337 |
| C        | 56.73274 | 32.14275 | 4.082437 | B  | 31.74479 | 23.55372 | 4.157712 | C | 48.84973 | 18.48368 | 3.998737 |
| C        | 28.78447 | 32.86843 | 4.092462 | B  | 25.96129 | 23.48533 | 4.077287 | C | 20.90362 | 19.17140 | 3.998787 |
| H        | 30.94874 | 30.22139 | 4.137962 | C  | 33.04805 | 22.82038 | 4.176387 | H | 46.70940 | 21.13110 | 4.039737 |
| C        | 42.72701 | 17.98623 | 4.117887 | C  | 24.67035 | 22.73041 | 4.057762 | H | 48.86085 | 17.38167 | 3.986787 |
| C        | 44.11533 | 17.97146 | 4.081212 | C  | 33.09583 | 21.41339 | 4.170762 | H | 38.03716 | 22.45721 | 4.239187 |
| C        | 42.01919 | 16.79082 | 4.125362 | C  | 34.30007 | 20.72736 | 4.184887 | H | 35.85316 | 18.73201 | 4.191562 |
| C        | 42.70058 | 15.57987 | 4.098562 | C  | 35.52335 | 21.41543 | 4.205587 | H | 36.43896 | 23.37932 | 4.229362 |
| C        | 44.08968 | 15.56564 | 4.065437 | C  | 35.48855 | 22.81854 | 4.213187 | H | 34.30803 | 19.62325 | 4.178387 |
| C        | 44.79708 | 16.76136 | 4.055512 | C  | 34.28093 | 23.50052 | 4.198762 | H | 30.94420 | 32.69669 | 4.121487 |
| O        | 42.21188 | 14.21383 | 4.101012 | H  | 32.15240 | 20.84313 | 4.153262 | H | 16.37002 | 9.261732 | 4.103737 |
| O        | 44.55112 | 14.19181 | 4.048612 | C  | 36.79532 | 20.68152 | 4.212687 | H | 41.20218 | 9.269932 | 4.059162 |
| B        | 43.37431 | 13.43621 | 4.071937 | H  | 34.28661 | 24.60296 | 4.203987 | H | 55.77522 | 32.69149 | 4.066637 |
| C        | 43.36072 | 9.092412 | 4.082912 | C  | 38.02755 | 21.35381 | 4.226412 | H | 50.42490 | 23.26279 | 4.051962 |
| C        | 15.41439 | 9.814392 | 4.090962 | C  | 39.22256 | 20.64963 | 4.220162 | H | 23.43479 | 19.52376 | 4.003687 |
| C        | 44.56436 | 11.20096 | 4.084037 | C  | 39.25159 | 19.24178 | 4.201212 | H | 48.85866 | 22.36140 | 4.039362 |
| C        | 43.36589 | 11.94046 | 4.070887 | C  | 38.00940 | 18.57913 | 4.195137 | H | 21.85698 | 18.61551 | 3.987262 |
| <b>c</b> | 0.00000  | 0.00000  | 6.35625  | AB |          |          |          |   |          |          |          |

**Layer II serrated zigzag**

|   |          |           |          |   |          |           |          |   |          |           |          |
|---|----------|-----------|----------|---|----------|-----------|----------|---|----------|-----------|----------|
| C | 14.21174 | 23.033750 | 4.337007 | C | 28.78963 | 3.483380  | 4.307382 | C | 23.43716 | 11.555750 | 4.445557 |
| C | 16.61269 | 24.423480 | 4.358207 | C | 28.78458 | 2.096630  | 4.312057 | H | 26.79835 | 13.484860 | 4.474032 |
| C | 16.61141 | 23.037080 | 4.367507 | H | 3.00171  | 4.016097  | 4.337132 | H | 24.61293 | 9.755095  | 4.427982 |
| C | 15.41249 | 22.298770 | 4.356907 | H | 27.82887 | 4.023721  | 4.295682 | C | 11.25802 | 13.600860 | 4.281407 |
| H | 13.25057 | 22.493820 | 4.328207 | O | 32.84845 | 9.298897  | 4.268382 | C | 10.05845 | 12.905240 | 4.265407 |
| C | 16.16691 | 16.269740 | 4.372082 | O | 31.69768 | 11.336780 | 4.311107 | C | 8.83017  | 13.584830 | 4.271432 |
| C | 16.84700 | 17.481110 | 4.382757 | B | 32.93972 | 10.694730 | 4.277307 | C | 8.85491  | 14.988160 | 4.291982 |
| C | 16.13864 | 18.675920 | 4.374532 | O | 27.22369 | 9.359735  | 4.407757 | C | 10.05687 | 15.678930 | 4.306907 |
| C | 14.77759 | 16.253630 | 4.353632 | B | 27.16290 | 10.757360 | 4.420682 | H | 12.20536 | 13.037270 | 4.277232 |
| C | 14.06932 | 17.448970 | 4.347082 | O | 28.41846 | 11.372020 | 4.396557 | C | 7.55744  | 12.852450 | 4.261457 |
| C | 14.74965 | 18.660240 | 4.357157 | O | 18.27412 | 17.226770 | 4.402407 | H | 10.04323 | 16.781120 | 4.324057 |
| O | 16.59918 | 20.049890 | 4.379382 | O | 17.12890 | 15.185470 | 4.384207 | C | 35.48139 | 13.535530 | 4.273232 |
| O | 14.25906 | 20.024950 | 4.350332 | O | 13.84138 | 15.146670 | 4.337682 | C | 34.28031 | 12.843110 | 4.273632 |
| B | 15.42099 | 20.803200 | 4.363207 | O | 12.64879 | 17.160350 | 4.328057 | C | 34.23871 | 11.435660 | 4.261632 |

|   |          |           |          |                 |          |           |          |   |          |           |          |
|---|----------|-----------|----------|-----------------|----------|-----------|----------|---|----------|-----------|----------|
| C | 14.20740 | 24.420600 | 4.327732 | B               | 18.36963 | 15.831570 | 4.403007 | C | 6.32439  | 10.761530 | 4.244032 |
| C | 15.40931 | 25.146280 | 4.337757 | B               | 12.58613 | 15.763180 | 4.322582 | C | 7.52846  | 11.449250 | 4.244082 |
| H | 17.57358 | 22.499240 | 4.383257 | C               | 19.67289 | 15.098230 | 4.421682 | H | 33.33424 | 13.408950 | 4.285032 |
| C | 29.35185 | 10.264080 | 4.363182 | C               | 11.29519 | 15.008260 | 4.303057 | H | 6.33550  | 9.659517  | 4.232082 |
| C | 30.74017 | 10.249310 | 4.326507 | C               | 19.72067 | 13.691240 | 4.416057 | H | 24.66200 | 14.735060 | 4.484482 |
| C | 28.64403 | 9.068665  | 4.370657 | C               | 20.92491 | 13.005210 | 4.430182 | H | 22.47800 | 11.009860 | 4.436857 |
| C | 29.32542 | 7.857722  | 4.343857 | C               | 22.14819 | 13.693280 | 4.450882 | H | 23.06380 | 15.657170 | 4.474657 |
| C | 30.71452 | 7.843484  | 4.310732 | C               | 22.11339 | 15.096390 | 4.458482 | H | 20.93287 | 11.901100 | 4.423682 |
| C | 31.42192 | 9.039204  | 4.300807 | C               | 20.90577 | 15.778370 | 4.444057 | H | 17.56904 | 24.974540 | 4.366782 |
| O | 28.83672 | 6.491676  | 4.346307 | H               | 18.77724 | 13.120980 | 4.398557 | H | 2.99486  | 1.539580  | 4.349032 |
| O | 31.17596 | 6.469662  | 4.293907 | C               | 23.42016 | 12.959370 | 4.457982 | H | 27.82702 | 1.547780  | 4.304457 |
| B | 29.99915 | 5.714061  | 4.317232 | H               | 20.91145 | 16.880810 | 4.449282 | H | 42.40006 | 24.969340 | 4.311932 |
| C | 0.83538  | 1.370260  | 4.328207 | C               | 24.65239 | 13.631660 | 4.471707 | H | 37.04974 | 15.540640 | 4.297257 |
| C | 2.03923  | 2.092240  | 4.336257 | C               | 25.84740 | 12.927480 | 4.465457 | H | 10.05963 | 11.801610 | 4.248982 |
| C | 2.03902  | 3.478810  | 4.329332 | C               | 25.87643 | 11.519630 | 4.446507 | H | 35.48350 | 14.639250 | 4.284657 |
| C | 29.99073 | 4.218307  | 4.316182 | C               | 24.63424 | 10.856980 | 4.440432 | H | 8.48181  | 10.893360 | 4.232557 |
| c | 0.00000  | 0.00000   | 6.84684  | serrated zigzag |          |           |          |   |          |           |          |

## Layer II serrated armchair

|   |           |           |          |                   |           |           |          |   |           |           |          |
|---|-----------|-----------|----------|-------------------|-----------|-----------|----------|---|-----------|-----------|----------|
| C | 14.400860 | 22.340970 | 4.340427 | C                 | 28.978750 | 2.790600  | 4.310802 | C | 23.626280 | 10.862970 | 4.448977 |
| C | 16.801810 | 23.730700 | 4.361627 | C                 | 28.973700 | 1.403850  | 4.315477 | H | 26.987470 | 12.792080 | 4.477452 |
| C | 16.800530 | 22.344300 | 4.370927 | H                 | 3.190830  | 3.323317  | 4.340552 | H | 24.802050 | 9.062314  | 4.431402 |
| C | 15.601610 | 21.605990 | 4.360327 | H                 | 28.017990 | 3.330941  | 4.299102 | C | 11.447140 | 12.908080 | 4.284827 |
| H | 13.439690 | 21.801040 | 4.331627 | O                 | 33.037570 | 8.606116  | 4.271802 | C | 10.247570 | 12.212460 | 4.268827 |
| C | 16.356030 | 15.576960 | 4.375502 | O                 | 31.886800 | 10.644000 | 4.314527 | C | 9.019297  | 12.892050 | 4.274852 |
| C | 17.036120 | 16.788330 | 4.386177 | B                 | 33.128840 | 10.001950 | 4.280727 | C | 9.044030  | 14.295380 | 4.295402 |
| C | 16.327760 | 17.983140 | 4.377952 | O                 | 27.412810 | 8.666956  | 4.411177 | C | 10.245990 | 14.986150 | 4.310327 |
| C | 14.966710 | 15.560850 | 4.357052 | B                 | 27.352020 | 10.064580 | 4.424102 | H | 12.394480 | 12.344490 | 4.280652 |
| C | 14.258440 | 16.756190 | 4.350502 | O                 | 28.607580 | 10.679240 | 4.399977 | C | 7.746560  | 12.159670 | 4.264877 |
| C | 14.938770 | 17.967460 | 4.360577 | O                 | 18.463240 | 16.533990 | 4.405827 | H | 10.232350 | 16.088340 | 4.327477 |
| O | 16.788300 | 19.357110 | 4.382802 | O                 | 17.318020 | 14.492690 | 4.387627 | C | 35.670510 | 12.842750 | 4.276652 |
| O | 14.448180 | 19.332170 | 4.353752 | O                 | 14.030500 | 14.453890 | 4.341102 | C | 34.469430 | 12.150330 | 4.277052 |
| B | 15.610110 | 20.110420 | 4.366627 | O                 | 12.837910 | 16.467570 | 4.331477 | C | 34.427830 | 10.742880 | 4.265052 |
| C | 14.396520 | 23.727820 | 4.331152 | B                 | 18.558750 | 15.138790 | 4.406427 | C | 6.513510  | 10.068750 | 4.247452 |
| C | 15.598430 | 24.453500 | 4.341177 | B                 | 12.775250 | 15.070400 | 4.326002 | C | 7.717581  | 10.756470 | 4.247502 |
| H | 17.762700 | 21.806460 | 4.386677 | C                 | 19.862010 | 14.405450 | 4.425102 | H | 33.523360 | 12.716170 | 4.288452 |
| C | 29.540970 | 9.571300  | 4.366602 | C                 | 11.484310 | 14.315480 | 4.306477 | H | 6.524620  | 8.966738  | 4.235502 |
| C | 30.929290 | 9.556532  | 4.329927 | C                 | 19.909790 | 12.998460 | 4.419477 | H | 24.851120 | 14.042280 | 4.487902 |
| C | 28.833150 | 8.375884  | 4.374077 | C                 | 21.114030 | 12.312430 | 4.433602 | H | 22.667120 | 10.317080 | 4.440277 |
| C | 29.514540 | 7.164942  | 4.347277 | C                 | 22.337310 | 13.000500 | 4.454302 | H | 23.252920 | 14.964390 | 4.478077 |
| C | 30.903640 | 7.150704  | 4.314152 | C                 | 22.302510 | 14.403610 | 4.461902 | H | 21.121990 | 11.208320 | 4.427102 |
| C | 31.611040 | 8.346423  | 4.304227 | C                 | 21.094890 | 15.085590 | 4.447477 | H | 17.758160 | 24.281760 | 4.370202 |
| O | 29.025840 | 5.798896  | 4.349727 | H                 | 18.966360 | 12.428200 | 4.401977 | H | 3.183980  | 0.846800  | 4.352452 |
| O | 31.365080 | 5.776882  | 4.297327 | C                 | 23.609280 | 12.266590 | 4.461402 | H | 28.016140 | 0.855000  | 4.307877 |
| B | 30.188270 | 5.021281  | 4.320652 | H                 | 21.100570 | 16.188030 | 4.452702 | H | 42.589180 | 24.276560 | 4.315352 |
| C | 1.024500  | 0.677480  | 4.331627 | C                 | 24.841510 | 12.938880 | 4.475127 | H | 37.238860 | 14.847860 | 4.300677 |
| C | 2.228350  | 1.399460  | 4.339677 | C                 | 26.036520 | 12.234700 | 4.468877 | H | 10.248750 | 11.108830 | 4.252402 |
| C | 2.228140  | 2.786030  | 4.332752 | C                 | 26.065550 | 10.826850 | 4.449927 | H | 35.672620 | 13.946470 | 4.288077 |
| C | 30.179850 | 3.525527  | 4.319602 | C                 | 24.823360 | 10.164200 | 4.443852 | H | 8.670937  | 10.200580 | 4.235977 |
| c | 0.00000   | 0.00000   | 6.85368  | serrated armchair |           |           |          |   |           |           |          |

## COF-6M

### Layer I AA, AB, inclined zigzag & armchair, serrated zigzag & armchair

|   |          |          |           |   |          |          |           |
|---|----------|----------|-----------|---|----------|----------|-----------|
| C | 2.069789 | 2.222231 | 0.9642750 | B | 24.51850 | 15.19163 | 0.9585000 |
| C | 4.503057 | 3.615478 | 0.9920000 | O | 18.81151 | 13.76917 | 0.9918500 |
| C | 4.516872 | 2.213752 | 1.004500  | B | 18.72369 | 15.16558 | 1.007625  |
| C | 3.290919 | 1.533999 | 0.9900750 | O | 19.97116 | 15.79992 | 1.001375  |

|   |          |          |           |   |          |          |           |
|---|----------|----------|-----------|---|----------|----------|-----------|
| C | 19.12395 | 1.488225 | 0.9549250 | H | 5.462789 | 4.164466 | 1.002400  |
| C | 2.094722 | 3.623877 | 0.9524000 | H | 5.465576 | 5.986796 | 0.9831000 |
| C | 3.301635 | 4.337306 | 0.9658750 | H | 19.48176 | 5.994481 | 0.9224500 |
| C | 5.791527 | 1.472347 | 1.023550  | H | 19.47330 | 4.180899 | 0.9322500 |
| C | 20.92758 | 14.70809 | 0.9810750 | H | 3.287207 | 0.428162 | 0.9989750 |
| C | 22.31848 | 14.71442 | 0.9700000 | C | 5.816369 | 0.068796 | 1.027350  |
| C | 20.23823 | 13.50168 | 0.9754750 | C | 16.18345 | 15.24957 | 1.026825  |
| C | 20.93885 | 12.30068 | 0.9595250 | C | 8.260023 | 0.034787 | 1.023850  |
| C | 22.32830 | 12.30689 | 0.9511500 | C | 8.221853 | 1.443006 | 1.029450  |
| C | 23.01829 | 13.51413 | 0.9560750 | C | 7.024327 | 2.143892 | 1.029575  |
| O | 20.47047 | 10.92726 | 0.9532000 | H | 14.02684 | 15.39445 | 1.026575  |
| O | 22.80925 | 10.93757 | 0.9409500 | H | 16.16085 | 14.14730 | 1.025400  |
| B | 21.64331 | 10.16396 | 0.9437500 | H | 9.170374 | 2.004966 | 1.030050  |
| C | 21.63993 | 5.811987 | 0.9546500 | H | 7.033475 | 3.247776 | 1.030375  |
| C | 4.508557 | 6.536959 | 0.9669000 | C | 17.89443 | 2.165613 | 0.9377000 |
| C | 22.84239 | 7.924728 | 0.9602750 | C | 16.69275 | 1.471379 | 0.9388750 |
| C | 21.64565 | 8.667626 | 0.9422000 | C | 16.64719 | 0.063382 | 0.9549250 |
| C | 20.44625 | 7.929031 | 0.9281750 | C | 27.05415 | 15.27235 | 0.9677500 |
| C | 20.44070 | 6.541469 | 0.9334750 | C | 0.757990 | 0.084705 | 0.9681500 |
| H | 5.472964 | 8.459459 | 0.9717250 | H | 17.89104 | 3.269416 | 0.9252500 |
| H | 19.48475 | 8.468255 | 0.9127250 | H | 15.74778 | 2.039150 | 0.9272750 |
| O | 24.44228 | 13.79426 | 0.9496500 | H | 8.736521 | 14.17002 | 0.9806750 |
| O | 23.26568 | 15.81503 | 0.9714500 | H | 10.87745 | 15.40432 | 0.9807750 |

#### Transformation Matrix

|          |           |           |          |                   |
|----------|-----------|-----------|----------|-------------------|
| <b>a</b> | 18.333510 | 0.000000  | 0.000000 |                   |
| <b>b</b> | 9.166750  | 15.877270 | 0.000000 |                   |
| <b>c</b> | 0.000000  | 0.000000  | 3.446880 | AA                |
| <b>c</b> | 1.22371   | 0.70651   | 3.41316  | inclined zigzag   |
| <b>c</b> | 1.390080  | 0.000000  | 3.423420 | inclined armchair |

#### Layer II AB stacking

|   |          |          |          |   |          |          |          |
|---|----------|----------|----------|---|----------|----------|----------|
| C | 11.23654 | 7.514659 | 4.145750 | B | 33.68525 | 20.48406 | 4.139975 |
| C | 13.66981 | 8.907907 | 4.173475 | O | 27.97826 | 19.06160 | 4.173325 |
| C | 13.68363 | 7.506181 | 4.185975 | B | 27.89045 | 20.45801 | 4.189100 |
| C | 12.45767 | 6.826427 | 4.171550 | O | 29.13792 | 21.09235 | 4.182850 |
| C | 28.29070 | 6.780653 | 4.136400 | H | 14.62954 | 9.456894 | 4.183875 |
| C | 11.26148 | 8.916306 | 4.133875 | H | 14.63233 | 11.27922 | 4.164575 |
| C | 12.46839 | 9.629734 | 4.147350 | H | 28.64851 | 11.28691 | 4.103925 |
| C | 14.95828 | 6.764775 | 4.205025 | H | 28.64006 | 9.473328 | 4.113725 |
| C | 30.09433 | 20.00052 | 4.162550 | H | 12.45396 | 5.720591 | 4.180450 |
| C | 31.48523 | 20.00685 | 4.151475 | C | 14.98312 | 5.361225 | 4.208825 |
| C | 29.40498 | 18.79411 | 4.156950 | C | 25.35020 | 20.54200 | 4.208300 |
| C | 30.10561 | 17.59311 | 4.141000 | C | 17.42678 | 5.327216 | 4.205325 |
| C | 31.49506 | 17.59932 | 4.132625 | C | 17.38861 | 6.735435 | 4.210925 |
| C | 32.18504 | 18.80656 | 4.137550 | C | 16.19108 | 7.436320 | 4.211050 |
| O | 29.63723 | 16.21969 | 4.134675 | H | 23.19360 | 20.68688 | 4.208050 |
| O | 31.97601 | 16.23000 | 4.122425 | H | 25.32761 | 19.43973 | 4.206875 |
| B | 30.81007 | 15.45639 | 4.125225 | H | 18.33713 | 7.297395 | 4.211525 |
| C | 30.80669 | 11.10442 | 4.136125 | H | 16.20023 | 8.540205 | 4.211850 |
| C | 13.67531 | 11.82939 | 4.148375 | C | 27.06118 | 7.458041 | 4.119175 |
| C | 32.00914 | 13.21716 | 4.141750 | C | 25.85950 | 6.763807 | 4.120350 |
| C | 30.81240 | 13.96005 | 4.123675 | C | 25.81395 | 5.355811 | 4.136400 |
| C | 29.61301 | 13.22146 | 4.109650 | C | 36.22091 | 20.56478 | 4.149225 |
| C | 29.60746 | 11.83390 | 4.114950 | C | 9.924745 | 5.377133 | 4.149625 |
| H | 14.63972 | 13.75189 | 4.153200 | H | 27.05780 | 8.561845 | 4.106725 |
| H | 28.65150 | 13.76068 | 4.094200 | H | 24.91454 | 7.331578 | 4.108750 |

O 33.60904 19.08669 4.131125 H 17.90327 19.46245 4.162150  
O 32.43243 21.10746 4.152925 H 20.04420 20.69675 4.162250  
c 0.00000 0.00000 6.36295 AB

**Layer II serrated zigzag**

C 3.293499 2.928741 4.374015 B 16.575460 0.020870 4.368240  
C 5.726767 4.321988 4.401740 O 20.035220 14.475680 4.401590  
C 5.740582 2.920262 4.414240 B 19.947400 15.872090 4.417365  
C 4.514629 2.240509 4.399815 O 12.028120 0.629160 4.411115  
C 2.014150 2.194735 4.364665 H 6.686499 4.870976 4.412140  
C 3.318432 4.330387 4.362140 H 6.689286 6.693306 4.392840  
C 4.525345 5.043816 4.375615 H 20.705470 6.700991 4.332190  
C 7.015237 2.178857 4.433290 H 20.697010 4.887409 4.341990  
C 22.151290 15.414600 4.390815 H 4.510917 1.134672 4.408715  
C 23.542190 15.420930 4.379740 C 7.040079 0.775306 4.437090  
C 21.461940 14.208190 4.385215 C 8.240410 0.078810 4.436565  
C 22.162560 13.007190 4.369265 C 9.483733 0.741297 4.433590  
C 23.552010 13.013400 4.360890 C 9.445563 2.149516 4.439190  
C 24.242000 14.220640 4.365815 C 8.248036 2.850402 4.439315  
O 21.694180 11.633770 4.362940 H 6.083800 0.223690 4.436315  
O 24.032960 11.644080 4.350690 H 17.384560 14.853810 4.435140  
B 22.867020 10.870470 4.353490 H 10.394080 2.711476 4.439790  
C 4.530130 6.518497 4.364390 H 8.257185 3.954286 4.440115  
C 5.732267 7.243469 4.376640 C 19.118140 2.872123 4.347440  
C 5.732590 8.631238 4.370015 C 17.916460 2.177889 4.348615  
C 22.869360 9.374136 4.351940 C 17.870900 0.769892 4.364665  
C 21.669960 8.635541 4.337915 C 0.777600 0.101590 4.377490  
C 21.664410 7.247979 4.343215 C 1.981700 0.791215 4.377890  
H 6.696674 9.165969 4.381465 H 19.114750 3.975926 4.334990  
H 20.708460 9.174765 4.322465 H 16.971490 2.745660 4.337015  
O 25.665990 14.500770 4.359390 H 9.960231 14.876530 4.390415  
O 15.322640 0.644270 4.381190 H 2.934410 0.233560 4.390515  
c 0.00000 0.00000 6.81948 serrated zigzag

**Layer II serrated armchair**

C 3.459869 2.222231 4.377435 B 25.908580 15.191630 4.371660  
C 5.893137 3.615478 4.405160 O 20.201590 13.769170 4.405010  
C 5.906952 2.213752 4.417660 B 20.113770 15.165580 4.420785  
C 4.680999 1.533999 4.403235 O 21.361240 15.799920 4.414535  
C 2.180520 1.488225 4.368085 H 6.852869 4.164466 4.415560  
C 3.484802 3.623877 4.365560 H 6.855656 5.986796 4.396260  
C 4.691715 4.337306 4.379035 H 20.871840 5.994481 4.335610  
C 7.181607 1.472347 4.436710 H 2.529870 4.180899 4.345410  
C 22.317660 14.708090 4.394235 H 4.677287 0.428162 4.412135  
C 23.708560 14.714420 4.383160 C 7.206449 0.068796 4.440510  
C 21.628310 13.501680 4.388635 C 17.573530 15.249570 4.439985  
C 22.328930 12.300680 4.372685 C 9.650103 0.034787 4.437010  
C 23.718380 12.306890 4.364310 C 9.611933 1.443006 4.442610  
C 24.408370 13.514130 4.369235 C 8.414407 2.143892 4.442735  
O 21.860550 10.927260 4.366360 H 15.416920 15.394450 4.439735  
O 24.199330 10.937570 4.354110 H 17.550930 14.147300 4.438560  
B 23.033390 10.163960 4.356910 H 10.560450 2.004966 4.443210  
C 4.696500 5.811987 4.367810 H 8.423555 3.247776 4.443535  
C 5.898637 6.536959 4.380060 C 19.284510 2.165613 4.350860  
C 5.898960 7.924728 4.373435 C 18.082830 1.471379 4.352035  
C 23.035730 8.667626 4.355360 C 18.037270 0.063382 4.368085



|   |           |           |          |                   |           |           |          |
|---|-----------|-----------|----------|-------------------|-----------|-----------|----------|
| C | 21.836330 | 7.929031  | 4.341335 | C                 | 10.110720 | 15.272350 | 4.380910 |
| C | 21.830780 | 6.541469  | 4.346635 | C                 | 2.148070  | 0.084705  | 4.381310 |
| H | 6.863044  | 8.459459  | 4.384885 | H                 | 19.281120 | 3.269416  | 4.338410 |
| H | 20.874830 | 8.468255  | 4.325885 | H                 | 17.137860 | 2.039150  | 4.340435 |
| O | 25.832360 | 13.794260 | 4.362810 | H                 | 10.126600 | 14.170020 | 4.393835 |
| O | 24.655760 | 15.815030 | 4.384610 | H                 | 12.267530 | 15.404320 | 4.393935 |
| c | 0.00000   | 0.00000   | 6.82632  | serrated armchair |           |           |          |

## COF-7M

### Layer I AA, AB, inclined zigzag & armchair, and serrated zigzag & armchair

|   |          |          |           |   |          |          |           |
|---|----------|----------|-----------|---|----------|----------|-----------|
| C | 2.089298 | 3.482910 | 0.8291060 | C | 9.432521 | 4.695974 | 0.8271560 |
| C | 3.321002 | 4.155495 | 0.8423260 | C | 8.043071 | 4.695796 | 0.8329760 |
| C | 4.552149 | 3.481775 | 0.8406360 | O | 9.906851 | 8.471457 | 0.8017060 |
| C | 4.518664 | 2.078683 | 0.8270560 | O | 11.54991 | 5.626999 | 0.8141760 |
| C | 3.319577 | 1.349452 | 0.8149560 | O | 7.095810 | 3.599552 | 0.8441360 |
| C | 2.121119 | 2.079809 | 0.8155560 | O | 5.925208 | 5.625911 | 0.8349760 |
| H | 5.473324 | 1.526728 | 0.8256260 | O | 10.38063 | 3.600256 | 0.8340060 |
| H | 1.165733 | 1.529205 | 0.8037860 | O | 7.566726 | 8.470697 | 0.8124060 |
| C | 7.348151 | 5.898857 | 0.8271560 | B | 8.736531 | 9.236634 | 0.8072560 |
| C | 8.042571 | 7.102210 | 0.8149560 | B | 5.847724 | 4.229781 | 0.8428760 |
| C | 9.432001 | 7.102548 | 0.8085560 | B | 11.62851 | 4.231011 | 0.8263060 |
| C | 10.12681 | 5.899374 | 0.8149560 | H | 3.321609 | 5.258204 | 0.8550860 |

#### Transformation Matrix

|          |           |          |          |                   |
|----------|-----------|----------|----------|-------------------|
| <b>a</b> | 10.834740 | 0.000000 | 0.000000 |                   |
| <b>b</b> | 5.417370  | 9.383160 | 0.000000 |                   |
| <b>c</b> | 0.000000  | 0.000000 | 3.495390 | AA                |
| <b>c</b> | 1.198785  | 0.692119 | 3.443941 | inclined zigzag   |
| <b>c</b> | 1.389345  | 0.000000 | 3.402900 | inclined armchair |

### Layer II AB stacking

|   |          |          |          |    |          |          |          |
|---|----------|----------|----------|----|----------|----------|----------|
| C | 7.506668 | 6.610630 | 4.132246 | C  | 14.84989 | 7.823694 | 4.130296 |
| C | 8.738372 | 7.283215 | 4.145466 | C  | 13.46044 | 7.823516 | 4.136116 |
| C | 9.969519 | 6.609495 | 4.143776 | O  | 15.32422 | 11.59918 | 4.104846 |
| C | 9.936033 | 5.206403 | 4.130196 | O  | 16.96728 | 8.754719 | 4.117316 |
| C | 8.736947 | 4.477172 | 4.118096 | O  | 12.51318 | 6.727272 | 4.147276 |
| C | 7.538489 | 5.207529 | 4.118696 | O  | 11.34258 | 8.753632 | 4.138116 |
| H | 10.89069 | 4.654448 | 4.128766 | O  | 15.79800 | 6.727976 | 4.137146 |
| H | 6.583103 | 4.656925 | 4.106926 | O  | 12.98410 | 11.59842 | 4.115546 |
| C | 12.76552 | 9.026577 | 4.130296 | B  | 14.15390 | 12.36435 | 4.110396 |
| C | 13.45994 | 10.22993 | 4.118096 | B  | 11.26509 | 7.357501 | 4.146016 |
| C | 14.84937 | 10.23027 | 4.111696 | B  | 17.04588 | 7.358731 | 4.129446 |
| C | 15.54418 | 9.027094 | 4.118096 | H  | 8.738979 | 8.385923 | 4.158226 |
| c | 0.00000  | 0.00000  | 6.60628  | AB |          |          |          |

### Layer II serrated zigzag

|   |          |          |         |   |           |          |         |
|---|----------|----------|---------|---|-----------|----------|---------|
| C | 3.288083 | 4.175029 | 4.26278 | C | 10.631310 | 5.388093 | 4.26083 |
| C | 4.519787 | 4.847614 | 4.27600 | C | 9.241856  | 5.387915 | 4.26665 |
| C | 5.750934 | 4.173894 | 4.27431 | O | 11.105640 | 9.163575 | 4.23538 |
| C | 5.717449 | 2.770802 | 4.26073 | O | 12.748690 | 6.319118 | 4.24785 |
| C | 4.518362 | 2.041571 | 4.24863 | O | 8.294595  | 4.291671 | 4.27781 |
| C | 3.319904 | 2.771928 | 4.24923 | O | 7.123993  | 6.318030 | 4.26865 |
| H | 6.672109 | 2.218847 | 4.25930 | O | 11.579410 | 4.292375 | 4.26768 |























|   |          |          |          |   |          |          |          |   |          |          |                   |
|---|----------|----------|----------|---|----------|----------|----------|---|----------|----------|-------------------|
| C | 20.41107 | 7.853272 | 4.212716 | C | 12.87283 | 17.92673 | 4.304246 | H | 0.349680 | 0.175720 | 4.292546          |
| C | 20.38957 | 9.253584 | 4.211866 | C | 11.63603 | 18.59870 | 4.302096 | H | 32.02481 | 18.45701 | 4.309876          |
| C | 21.68658 | 7.119095 | 4.226426 | C | 10.43617 | 17.90601 | 4.311976 | H | 11.64030 | 14.72098 | 4.337776          |
| C | 22.91389 | 7.798915 | 4.237796 | C | 10.41137 | 16.50340 | 4.325316 | H | 13.78689 | 15.95767 | 4.319476          |
| C | 24.11370 | 7.105876 | 4.253246 | C | 11.63962 | 15.82520 | 4.327376 | H | 10.07773 | 13.81456 | 4.355416          |
| C | 24.14995 | 5.698829 | 4.258166 | C | 12.83862 | 16.51954 | 4.316916 | H | 28.30186 | 13.80858 | 4.363746          |
| C | 22.91407 | 5.025237 | 4.245546 | O | 2.984246 | 0.539410 | 4.293496 | H | 30.45751 | 17.55431 | 4.318376          |
| C | 21.71333 | 5.716323 | 4.230276 | O | 18.02673 | 16.54940 | 4.271346 | H | 28.89286 | 18.45185 | 4.315826          |
| B | 2.898550 | 4.950769 | 4.274676 | B | 19.18362 | 15.77627 | 4.264196 | H | 15.47574 | 0.169370 | 4.300296          |
| O | 2.987480 | 3.561997 | 4.276096 | O | 20.34168 | 16.54752 | 4.276076 | H | 24.58656 | 15.95051 | 4.333096          |
| C | 4.380554 | 3.299269 | 4.289896 | O | 22.95739 | 18.05305 | 4.305396 | H | 26.73440 | 14.71442 | 4.349626          |
| C | 5.039829 | 2.049202 | 4.292946 | B | 24.20596 | 18.66766 | 4.306666 | H | 28.30742 | 12.00369 | 4.374546          |
| C | 6.475662 | 2.047992 | 4.297526 | O | 12.84452 | 0.531490 | 4.300516 | H | 5.762620 | 9.524688 | 4.366796          |
| C | 7.197130 | 3.293977 | 4.302776 | O | 12.84753 | 3.551238 | 4.265416 | H | 10.08628 | 9.532068 | 4.362096          |
| C | 6.480634 | 4.537913 | 4.306846 | B | 12.93881 | 4.939757 | 4.257046 | H | 10.07813 | 12.01055 | 4.369826          |
| C | 5.068462 | 4.487441 | 4.297426 | O | 11.69164 | 5.556746 | 4.273196 | H | 25.06132 | 7.668761 | 4.261826          |
| C | 7.233879 | 5.733271 | 4.318776 | C | 9.137340 | 15.76684 | 4.337016 | H | 22.91329 | 8.902993 | 4.234676          |
| C | 8.606708 | 5.731416 | 4.316776 | C | 9.119530 | 14.36666 | 4.352396 | H | 20.75725 | 5.164138 | 4.221276          |
| C | 9.356662 | 4.534379 | 4.303576 | C | 7.917350 | 13.64834 | 4.362166 | H | 22.90186 | 3.923150 | 4.248096          |
| C | 8.637088 | 3.292298 | 4.302016 | C | 29.25856 | 14.36334 | 4.357026 | H | 19.19018 | 6.062794 | 4.280396          |
| C | 9.356211 | 2.044985 | 4.298096 | C | 29.23721 | 15.76352 | 4.341516 | H | 17.02501 | 9.803075 | 4.190126          |
| C | 10.79185 | 2.043364 | 4.293676 | C | 30.45905 | 16.44824 | 4.331646 | H | 21.34636 | 9.808386 | 4.220676          |
| C | 11.45396 | 3.291537 | 4.285116 | C | 7.919790 | 12.17717 | 4.370396 | H | 21.34209 | 11.61083 | 4.224326          |
| C | 10.76853 | 4.481037 | 4.290116 | C | 6.718620 | 11.45246 | 4.372246 | H | 21.34551 | 14.08908 | 4.252566          |
| C | 8.634732 | 0.799057 | 4.297696 | C | 6.722090 | 10.06717 | 4.367666 | H | 17.02162 | 14.08849 | 4.227926          |
| C | 7.194886 | 0.800659 | 4.296376 | C | 7.924391 | 9.335764 | 4.361246 | H | 17.02587 | 11.61013 | 4.199066          |
| C | 17.74881 | 19.08315 | 4.292316 | C | 9.124657 | 10.07074 | 4.365046 | H | 15.46124 | 8.894695 | 4.195176          |
| C | 16.33685 | 19.13630 | 4.292276 | C | 9.123293 | 11.45613 | 4.369596 | H | 13.31586 | 7.654508 | 4.224366          |
| C | 4.377905 | 0.800444 | 4.291676 | C | 27.96203 | 16.49787 | 4.333496 | H | 15.48466 | 3.914481 | 4.233426          |
| C | 11.45145 | 0.793766 | 4.296646 | C | 27.93620 | 17.90045 | 4.319646 | H | 17.62649 | 5.161092 | 4.205196          |
| c | 0.00000  | 0.00000  | 6.79272  |   |          |          |          |   |          |          | serrated armchair |

## COF-11M

### Layer I AA, AB, inclined zigzag & armchair, serrated zigzag & armchair

|   |          |          |          |   |          |          |          |
|---|----------|----------|----------|---|----------|----------|----------|
| C | 6.029330 | 8.768199 | 7.743065 | C | 17.15021 | 6.996589 | 7.808554 |
| C | 7.277517 | 9.427519 | 7.752586 | C | 16.46681 | 8.179989 | 7.816382 |
| C | 7.252033 | 10.83956 | 7.750654 | O | 8.650606 | 7.269379 | 7.767845 |
| C | 21.17628 | 11.55042 | 7.740655 | O | 17.41270 | 9.284769 | 7.825348 |
| C | 19.95718 | 10.86990 | 7.732084 | B | 18.64921 | 8.651609 | 7.822211 |
| C | 19.95041 | 9.473769 | 7.733063 | O | 18.57954 | 7.264169 | 7.812064 |
| B | 8.567448 | 8.666579 | 7.765151 | O | 2.290272 | 2.200259 | 7.780051 |
| O | 9.823492 | 9.282629 | 7.775844 | B | 3.526822 | 2.833349 | 7.776802 |
| C | 10.76074 | 8.178919 | 7.784836 | O | 3.457262 | 4.220809 | 7.784103 |
| C | 12.17156 | 8.240099 | 7.796441 | O | 12.44407 | 10.80364 | 7.812343 |
| C | 12.89116 | 6.993119 | 7.797756 | B | 13.60999 | 11.55898 | 7.825169 |
| C | 12.16734 | 5.742769 | 7.793236 | O | 14.77729 | 10.80555 | 7.828099 |
| C | 10.72626 | 5.742849 | 7.786936 | O | 8.650353 | 4.216689 | 7.789758 |
| C | 10.07482 | 6.997209 | 7.780148 | B | 8.566852 | 2.819509 | 7.798276 |
| C | 14.33581 | 6.993719 | 7.804075 | C | 7.276627 | 2.059149 | 7.805703 |
| C | 15.05524 | 8.241649 | 7.813150 | C | 6.028722 | 2.719139 | 7.802707 |
| C | 14.29536 | 9.433119 | 7.816544 | C | 4.827250 | 2.014289 | 7.811697 |
| C | 12.92917 | 9.432439 | 7.807315 | C | 4.833230 | 0.618220 | 7.824137 |
| C | 15.05847 | 5.742629 | 7.800000 | C | 13.61305 | 13.03318 | 7.827328 |
| C | 14.33569 | 4.491589 | 7.796688 | C | 7.250310 | 0.647160 | 7.818232 |
| C | 12.89101 | 4.492319 | 7.796258 | O | 9.822869 | 2.203239 | 7.801608 |
| C | 12.17126 | 3.245409 | 7.798302 | O | 12.44368 | 0.681820 | 7.808698 |

|   |          |          |          |   |          |          |          |
|---|----------|----------|----------|---|----------|----------|----------|
| C | 10.76039 | 3.306769 | 7.796534 | B | 21.17066 | 13.02252 | 7.809775 |
| C | 10.07465 | 4.488579 | 7.789561 | O | 14.77694 | 0.679700 | 7.803260 |
| C | 12.92882 | 2.052999 | 7.801846 | H | 5.996126 | 3.823479 | 7.793185 |
| C | 14.29506 | 2.052179 | 7.798633 | H | 3.882250 | 0.057630 | 7.831465 |
| C | 15.05502 | 3.243589 | 7.794485 | H | 8.200110 | 0.082340 | 7.821305 |
| C | 16.46660 | 3.305119 | 7.789248 | H | 8.202126 | 11.40385 | 7.757337 |
| C | 17.15010 | 4.488489 | 7.791566 | H | 19.00654 | 11.43107 | 7.724606 |
| C | 16.49860 | 5.742569 | 7.799910 | H | 5.996109 | 7.663829 | 7.743672 |

Transformation Matrix

|          |           |           |          |                   |
|----------|-----------|-----------|----------|-------------------|
| <b>a</b> | 15.122130 | 0.000000  | 0.000000 |                   |
| <b>b</b> | 7.561060  | 13.096150 | 0.000000 |                   |
| <b>c</b> | 0.000000  | 0.000000  | 3.465420 | AA                |
| <b>c</b> | 1.22487   | 0.70718   | 3.40974  | inclined zigzag   |
| <b>c</b> | 1.407205  | 0.000000  | 3.407183 | inclined armchair |

**Layer II AB stacking**

|          |          |          |          |    |          |          |          |
|----------|----------|----------|----------|----|----------|----------|----------|
| C        | 13.59039 | 13.13358 | 11.12486 | C  | 24.71128 | 11.36197 | 11.19035 |
| C        | 14.83858 | 13.79290 | 11.13438 | C  | 24.02788 | 12.54537 | 11.19818 |
| C        | 14.81310 | 15.20494 | 11.13245 | O  | 16.21167 | 11.63476 | 11.14964 |
| C        | 28.73735 | 15.91580 | 11.12245 | O  | 24.97377 | 13.65015 | 11.20714 |
| C        | 27.51825 | 15.23528 | 11.11388 | B  | 26.21028 | 13.01699 | 11.20401 |
| C        | 27.51148 | 13.83915 | 11.11486 | O  | 26.14061 | 11.62955 | 11.19386 |
| B        | 16.12851 | 13.03196 | 11.14695 | O  | 9.851337 | 6.565642 | 11.16185 |
| O        | 17.38456 | 13.64801 | 11.15764 | B  | 11.08789 | 7.198732 | 11.15860 |
| C        | 18.32181 | 12.54430 | 11.16663 | O  | 11.01833 | 8.586192 | 11.16590 |
| C        | 19.73263 | 12.60548 | 11.17824 | O  | 20.00513 | 15.16902 | 11.19414 |
| C        | 20.45222 | 11.35850 | 11.17955 | B  | 21.17105 | 15.92436 | 11.20696 |
| C        | 19.72840 | 10.10815 | 11.17503 | O  | 22.33836 | 15.17093 | 11.20989 |
| C        | 18.28732 | 10.10823 | 11.16873 | O  | 16.21142 | 8.582072 | 11.17155 |
| C        | 17.63589 | 11.36259 | 11.16194 | B  | 16.12792 | 7.184892 | 11.18007 |
| C        | 21.89688 | 11.35910 | 11.18587 | C  | 14.83769 | 6.424532 | 11.18750 |
| C        | 22.61630 | 12.60703 | 11.19494 | C  | 13.58979 | 7.084522 | 11.18450 |
| C        | 21.85642 | 13.79850 | 11.19834 | C  | 12.38832 | 6.379672 | 11.19349 |
| C        | 20.49023 | 13.79782 | 11.18911 | C  | 12.39429 | 4.983603 | 11.20593 |
| C        | 22.61954 | 10.10801 | 11.18180 | C  | 21.17412 | 17.39856 | 11.20912 |
| C        | 21.89676 | 8.856972 | 11.17848 | C  | 14.81137 | 5.012543 | 11.20003 |
| C        | 20.45208 | 8.857702 | 11.17805 | O  | 17.38393 | 6.568622 | 11.18340 |
| C        | 19.73232 | 7.610792 | 11.18010 | O  | 20.00475 | 5.047203 | 11.19049 |
| C        | 18.32146 | 7.672152 | 11.17833 | B  | 28.73173 | 17.38790 | 11.19157 |
| C        | 17.63572 | 8.853962 | 11.17136 | O  | 22.33801 | 5.045083 | 11.18505 |
| C        | 20.48989 | 6.418382 | 11.18364 | H  | 13.55719 | 8.188862 | 11.17498 |
| C        | 21.85612 | 6.417562 | 11.18043 | H  | 11.44332 | 4.423013 | 11.21326 |
| C        | 22.61609 | 7.608972 | 11.17628 | H  | 15.76118 | 4.447723 | 11.20310 |
| C        | 24.02767 | 7.670502 | 11.17104 | H  | 15.76319 | 15.76923 | 11.13913 |
| C        | 24.71117 | 8.853872 | 11.17336 | H  | 26.56761 | 15.79645 | 11.10640 |
| C        | 24.05967 | 10.10795 | 11.18171 | H  | 13.55717 | 12.02921 | 11.12547 |
| <b>c</b> | 0.00000  | 0.00000  | 6.76359  | AB |          |          |          |

**Layer II serrated zigzag**

|   |          |          |         |   |          |          |         |
|---|----------|----------|---------|---|----------|----------|---------|
| C | 7.254205 | 9.475381 | 11.1493 | C | 18.37508 | 7.703771 | 11.2148 |
| C | 8.502392 | 10.13470 | 11.1589 | C | 17.69168 | 8.887171 | 11.2227 |
| C | 8.476908 | 11.54674 | 11.1569 | O | 9.875481 | 7.976561 | 11.1741 |
| C | 22.40115 | 12.25760 | 11.1469 | O | 18.63758 | 9.991951 | 11.2316 |
| C | 21.18205 | 11.57708 | 11.1384 | B | 19.87408 | 9.358791 | 11.2285 |
| C | 21.17529 | 10.18095 | 11.1393 | O | 19.80441 | 7.971351 | 11.2183 |
| B | 9.792322 | 9.373761 | 11.1714 | O | 3.515147 | 2.907441 | 11.1863 |

|   |          |          |         |   |                 |          |         |
|---|----------|----------|---------|---|-----------------|----------|---------|
| O | 11.04837 | 9.989811 | 11.1821 | B | 4.751697        | 3.540531 | 11.1831 |
| C | 11.98561 | 8.886101 | 11.1911 | O | 4.682137        | 4.927991 | 11.1904 |
| C | 13.39643 | 8.947281 | 11.2027 | O | 13.66895        | 11.51082 | 11.2186 |
| C | 14.11604 | 7.700301 | 11.2040 | B | 14.83487        | 12.26616 | 11.2314 |
| C | 13.39222 | 6.449951 | 11.1995 | O | 16.00216        | 11.51273 | 11.2344 |
| C | 11.95114 | 6.450031 | 11.1932 | O | 9.875229        | 4.923871 | 11.1960 |
| C | 11.29969 | 7.704391 | 11.1864 | B | 9.791727        | 3.526691 | 11.2046 |
| C | 15.56068 | 7.700901 | 11.2103 | C | 8.501502        | 2.766331 | 11.2120 |
| C | 16.28012 | 8.948831 | 11.2194 | C | 7.253597        | 3.426321 | 11.2090 |
| C | 15.52024 | 10.14030 | 11.2228 | C | 6.052125        | 2.721471 | 11.2180 |
| C | 14.15405 | 10.13962 | 11.2136 | C | 6.058105        | 1.325402 | 11.2304 |
| C | 16.28334 | 6.449811 | 11.2063 | C | 14.83792        | 13.74036 | 11.2336 |
| C | 15.56056 | 5.198771 | 11.2030 | C | 8.475185        | 1.354342 | 11.2245 |
| C | 14.11588 | 5.199501 | 11.2025 | O | 11.04774        | 2.910421 | 11.2079 |
| C | 13.39614 | 3.952591 | 11.2046 | O | 13.66855        | 1.389002 | 11.2150 |
| C | 11.98527 | 4.013951 | 11.2028 | B | 22.39553        | 13.72970 | 11.2160 |
| C | 11.29952 | 5.195761 | 11.1958 | O | 16.00182        | 1.386882 | 11.2095 |
| C | 14.15369 | 2.760181 | 11.2081 | H | 7.221001        | 4.530661 | 11.1995 |
| C | 15.51994 | 2.759361 | 11.2049 | H | 5.107125        | 0.764812 | 11.2377 |
| C | 16.27990 | 3.950771 | 11.2008 | H | 9.424986        | 0.789522 | 11.2276 |
| C | 17.69147 | 4.012301 | 11.1955 | H | 9.427000        | 12.11103 | 11.1636 |
| C | 18.37498 | 5.195671 | 11.1978 | H | 20.23141        | 12.13825 | 11.1309 |
| C | 17.72347 | 6.449751 | 11.2062 | H | 7.220984        | 8.371011 | 11.1499 |
| c | 0.00000  | 0.00000  | 6.81264 |   | serrated zigzag |          |         |

## Layer II serrated armchair

|   |          |          |          |   |          |          |          |
|---|----------|----------|----------|---|----------|----------|----------|
| C | 7.436535 | 8.768199 | 11.14939 | C | 18.55742 | 6.996589 | 11.21487 |
| C | 8.684722 | 9.427519 | 11.15891 | C | 17.87402 | 8.179989 | 11.22270 |
| C | 8.659238 | 10.83956 | 11.15697 | O | 10.05781 | 7.269379 | 11.17417 |
| C | 22.58348 | 11.55042 | 11.14697 | O | 18.81991 | 9.284769 | 11.23167 |
| C | 21.36439 | 10.86990 | 11.13840 | B | 20.05642 | 8.651609 | 11.22853 |
| C | 21.35762 | 9.473769 | 11.13938 | O | 19.98675 | 7.264169 | 11.21838 |
| B | 9.974652 | 8.666579 | 11.17147 | O | 3.697477 | 2.200259 | 11.18637 |
| O | 11.23070 | 9.282629 | 11.18216 | B | 4.934027 | 2.833349 | 11.18312 |
| C | 12.16794 | 8.178919 | 11.19116 | O | 4.864467 | 4.220809 | 11.19042 |
| C | 13.57876 | 8.240099 | 11.20276 | O | 13.85127 | 10.80364 | 11.21866 |
| C | 14.29836 | 6.993119 | 11.20408 | B | 15.01719 | 11.55898 | 11.23149 |
| C | 13.57454 | 5.742769 | 11.19956 | O | 16.18450 | 10.80555 | 11.23442 |
| C | 12.13346 | 5.742849 | 11.19326 | O | 10.05756 | 4.216689 | 11.19608 |
| C | 11.48202 | 6.997209 | 11.18647 | B | 9.974056 | 2.819509 | 11.20460 |
| C | 15.74301 | 6.993719 | 11.21039 | C | 8.683832 | 2.059149 | 11.21202 |
| C | 16.46244 | 8.241649 | 11.21947 | C | 7.435927 | 2.719139 | 11.20903 |
| C | 15.70256 | 9.433119 | 11.22286 | C | 6.234455 | 2.014289 | 11.21802 |
| C | 14.33637 | 9.432439 | 11.21363 | C | 6.240435 | 0.618220 | 11.23046 |
| C | 16.46568 | 5.742629 | 11.20632 | C | 15.02026 | 13.03318 | 11.23365 |
| C | 15.74289 | 4.491589 | 11.20301 | C | 8.657515 | 0.647160 | 11.22455 |
| C | 14.29821 | 4.492319 | 11.20258 | O | 11.23007 | 2.203239 | 11.20793 |
| C | 13.57846 | 3.245409 | 11.20462 | O | 13.85088 | 0.681820 | 11.21502 |
| C | 12.16759 | 3.306769 | 11.20285 | B | 22.57787 | 13.02252 | 11.21609 |
| C | 11.48185 | 4.488579 | 11.19588 | O | 16.18414 | 0.679700 | 11.20958 |
| C | 14.33602 | 2.052999 | 11.20817 | H | 7.403331 | 3.823479 | 11.19950 |
| C | 15.70226 | 2.052179 | 11.20495 | H | 5.289455 | 0.057630 | 11.23779 |
| C | 16.46222 | 3.243589 | 11.20081 | H | 9.607315 | 0.082340 | 11.22762 |
| C | 17.87381 | 3.305119 | 11.19557 | H | 9.609330 | 11.40385 | 11.16366 |
| C | 18.55731 | 4.488489 | 11.19789 | H | 20.41375 | 11.43107 | 11.13093 |
| C | 17.90581 | 5.742569 | 11.20623 | H | 7.403314 | 7.663829 | 11.14999 |

c 0.00000 0.00000 6.81264 serrated armchair

**TP COF-2M**

**Layer I AA, AB, inclined zigzag & armchair, serrated zigzag & armchair**

|            |          |          |            |          |          |            |          |          |
|------------|----------|----------|------------|----------|----------|------------|----------|----------|
| C 11.53373 | 17.29940 | 7.897015 | C 6.948308 | 5.495443 | 7.790462 | C 15.51659 | 5.074529 | 7.910435 |
| C 10.81540 | 16.08678 | 7.889568 | C 6.963305 | 6.861492 | 7.807947 | C 14.79675 | 6.309104 | 7.922283 |
| C 9.386423 | 16.12945 | 7.891382 | C 5.650118 | 3.343056 | 7.768093 | C 15.52279 | 7.539138 | 7.913510 |
| C 30.43892 | 17.38967 | 7.900753 | C 4.452850 | 2.681089 | 7.770287 | C 16.92713 | 7.509400 | 7.893935 |
| C 31.20175 | 18.57367 | 7.907957 | O 19.92867 | 5.149659 | 7.851935 | C 13.36539 | 6.316542 | 7.942979 |
| C 10.86680 | 18.52356 | 7.906059 | B 19.15823 | 6.316537 | 7.864342 | C 12.65723 | 7.558408 | 7.954891 |
| C 28.99692 | 17.39786 | 7.902335 | O 19.94037 | 7.478925 | 7.860467 | C 13.41708 | 8.783940 | 7.945538 |
| C 28.27953 | 16.23948 | 7.894841 | O 21.52952 | 10.09981 | 7.846352 | C 14.77946 | 8.775408 | 7.925808 |
| C 28.93109 | 14.95246 | 7.884808 | B 22.17415 | 11.34171 | 7.846267 | C 14.75644 | 3.845973 | 7.919866 |
| C 8.631410 | 14.91323 | 7.883423 | C 21.44998 | 12.65246 | 7.848131 | C 13.39303 | 3.851842 | 7.939608 |
| C 9.294085 | 13.64705 | 7.873590 | C 22.15148 | 13.87463 | 7.849526 | C 12.64163 | 5.083708 | 7.951964 |
| C 8.522690 | 12.47073 | 7.864807 | C 21.49758 | 15.11753 | 7.853895 | C 11.23282 | 5.120296 | 7.942434 |
| C 28.83890 | 12.48731 | 7.865308 | C 20.06886 | 15.15289 | 7.856809 | C 10.55090 | 6.336157 | 7.983824 |
| C 28.20938 | 13.74730 | 7.875818 | C 19.33805 | 13.92472 | 7.854147 | C 11.24899 | 7.542093 | 7.975286 |
| C 11.45896 | 14.79528 | 7.880022 | C 20.04195 | 12.70941 | 7.849787 | H 27.10604 | 13.79462 | 7.876607 |
| C 10.73877 | 13.63745 | 7.872524 | C 19.37718 | 16.40523 | 7.862851 | H 9.048549 | 11.49908 | 7.856876 |
| B 28.03353 | 11.22390 | 7.854322 | C 20.11559 | 17.62964 | 7.865990 | H 23.25629 | 13.85647 | 7.847719 |
| O 6.884225 | 9.950203 | 7.842186 | C 21.55708 | 17.56425 | 7.862517 | H 19.46911 | 11.76453 | 7.848138 |
| C 5.755644 | 9.046624 | 7.834604 | C 22.21482 | 16.37033 | 7.856641 | H 17.47370 | 8.468995 | 7.887759 |
| C 5.783925 | 7.635924 | 7.820360 | C 17.94759 | 16.43221 | 7.866268 | H 17.46608 | 4.140168 | 7.882244 |
| C 4.526696 | 6.938115 | 7.817264 | C 17.23538 | 15.17725 | 7.863058 | H 12.63820 | 17.29018 | 7.895675 |
| C 25.01942 | 7.688411 | 7.828087 | C 17.89570 | 13.98475 | 7.857155 | H 19.83174 | 0.738500 | 7.915137 |
| C 25.05096 | 9.130285 | 7.837695 | C 17.29024 | 17.67784 | 7.872745 | H 16.18677 | 17.71970 | 7.875516 |
| C 26.31880 | 9.760226 | 7.841638 | C 7.153850 | 0.050300 | 7.875762 | H 9.099760 | 0.989080 | 7.875019 |
| C 23.75442 | 6.989074 | 7.829306 | C 8.547570 | 0.032790 | 7.872471 | H 10.65328 | 4.180081 | 7.979670 |
| C 22.51656 | 7.729205 | 7.839743 | O 23.56869 | 11.22691 | 7.844745 | H 10.68723 | 8.492787 | 7.984669 |
| C 22.61078 | 9.138580 | 7.843066 | O 26.63275 | 11.17893 | 7.854360 | H 23.31998 | 16.35819 | 7.854279 |
| C 23.80739 | 9.800035 | 7.842160 | O 21.36941 | 2.531600 | 7.825842 | H 22.13660 | 18.50505 | 7.864892 |
| C 23.73321 | 5.544355 | 7.820461 | B 21.96362 | 1.276360 | 7.811249 | H 17.31745 | 13.04286 | 7.854983 |
| C 22.47369 | 4.850706 | 7.826912 | O 1.626130 | 1.303490 | 7.794398 | H 16.13047 | 15.18767 | 7.865653 |
| C 21.29406 | 5.624925 | 7.841077 | O 4.694230 | 1.246050 | 7.748926 | H 15.32964 | 9.733315 | 7.919179 |
| C 21.30888 | 6.990464 | 7.845919 | B 6.080430 | 1.151040 | 7.734575 | H 12.87823 | 9.748173 | 7.954705 |
| C 4.505702 | 5.492987 | 7.802299 | O 6.737047 | 2.375562 | 7.745324 | H 15.29094 | 2.878303 | 7.911016 |
| C 3.240720 | 4.793623 | 7.804294 | O 8.320065 | 5.004504 | 7.780248 | H 12.84489 | 2.892184 | 7.946462 |
| C 3.208953 | 3.352280 | 7.790728 | B 9.082167 | 6.167326 | 7.793336 | H 12.56318 | 14.74916 | 7.878684 |
| C 1.939740 | 2.726316 | 7.799774 | O 8.335097 | 7.338007 | 7.810074 | H 11.27392 | 12.67013 | 7.865308 |
| C 22.50238 | 3.440037 | 7.818167 | C 17.65861 | 6.306237 | 7.882397 | H 28.46698 | 18.36703 | 7.909660 |
| C 5.743215 | 4.753431 | 7.786190 | C 16.92294 | 5.102267 | 7.890790 | H 27.17570 | 16.28299 | 7.896270 |

**Transformation Matrix**

|          |           |           |          |                   |
|----------|-----------|-----------|----------|-------------------|
| <b>a</b> | 21.727490 | 0.000000  | 0.000000 |                   |
| <b>b</b> | 10.863740 | 18.816550 | 0.000000 |                   |
| <b>c</b> | 0.000000  | 0.000000  | 3.468760 | AA                |
| <b>c</b> | 1.40699   | 0.000000  | 3.400518 | inclined zigzag   |
| <b>c</b> | 1.22029   | 0.70453   | 3.404958 | inclined armchair |

**Layer II serrated zigzag**

|            |          |          |            |          |          |            |          |          |
|------------|----------|----------|------------|----------|----------|------------|----------|----------|
| C 12.75401 | 18.00393 | 11.29992 | C 8.168593 | 6.199975 | 11.19336 | C 16.73688 | 5.779061 | 11.31334 |
| C 12.03569 | 16.79131 | 11.29247 | C 8.183590 | 7.566024 | 11.21085 | C 16.01703 | 7.013636 | 11.32518 |
| C 10.60671 | 16.83398 | 11.29428 | C 6.870403 | 4.047588 | 11.17099 | C 16.74307 | 8.243670 | 11.31641 |
| C 31.65920 | 18.09420 | 11.30365 | C 5.673135 | 3.385621 | 11.17319 | C 18.14742 | 8.213932 | 11.29683 |
| C 32.42204 | 19.27820 | 11.31086 | O 21.14896 | 5.854191 | 11.25484 | C 14.58568 | 7.021074 | 11.34588 |
| C 12.08709 | 19.22809 | 11.30896 | B 20.37852 | 7.021069 | 11.26724 | C 13.87752 | 8.262939 | 11.35779 |
| C 30.21721 | 18.10239 | 11.30523 | O 21.16066 | 8.183457 | 11.26337 | C 14.63737 | 9.488472 | 11.34844 |





|   |          |          |          |                   |          |          |          |   |          |          |          |
|---|----------|----------|----------|-------------------|----------|----------|----------|---|----------|----------|----------|
| C | 25.14020 | 5.544355 | 11.22336 | B                 | 23.37061 | 1.276360 | 11.21415 | H | 18.72444 | 13.04286 | 11.25788 |
| C | 23.88068 | 4.850706 | 11.22981 | O                 | 3.033120 | 1.303490 | 11.19730 | H | 17.53746 | 15.18767 | 11.26855 |
| C | 22.70105 | 5.624925 | 11.24398 | O                 | 6.101220 | 1.246050 | 11.15183 | H | 16.73663 | 9.733315 | 11.32208 |
| C | 22.71587 | 6.990464 | 11.24882 | B                 | 7.487420 | 1.151040 | 11.13748 | H | 14.28522 | 9.748173 | 11.35760 |
| C | 5.912692 | 5.492987 | 11.20520 | O                 | 8.144037 | 2.375562 | 11.14822 | H | 16.69793 | 2.878303 | 11.31392 |
| C | 4.647710 | 4.793623 | 11.20719 | O                 | 9.727055 | 5.004504 | 11.18315 | H | 14.25188 | 2.892184 | 11.34936 |
| C | 4.615943 | 3.352280 | 11.19363 | B                 | 10.48916 | 6.167326 | 11.19624 | H | 13.97017 | 14.74916 | 11.28158 |
| C | 3.346730 | 2.726316 | 11.20267 | O                 | 9.742087 | 7.338007 | 11.21297 | H | 12.68091 | 12.67013 | 11.26821 |
| C | 23.90937 | 3.440037 | 11.22107 | C                 | 19.06560 | 6.306237 | 11.28530 | H | 29.87397 | 18.36703 | 11.31256 |
| C | 7.150205 | 4.753431 | 11.18909 | C                 | 18.32993 | 5.102267 | 11.29369 | H | 28.58269 | 16.28299 | 11.29917 |
| c | 0.00000  | 0.00000  | 6.80580  | serrated armchair |          |          |          |   |          |          |          |

## REF-I

### Layer I AA, AB, inclined zigzag, and serrated zigzag

|   |            |            |            |
|---|------------|------------|------------|
| O | 8.53482300 | 5.11449700 | 0.79376800 |
| B | 5.86856000 | 0.79392900 | 0.79376800 |
| B | 7.07711000 | 2.88729900 | 0.79376800 |
| O | 5.86856000 | 3.57514900 | 0.79376800 |
| B | 4.66000000 | 2.88729900 | 0.79376800 |
| O | 4.66869000 | 1.49697900 | 0.79376800 |
| B | 9.73479300 | 5.81749700 | 0.79376800 |
| B | 3.21081700 | 3.72373700 | 0.79376800 |
| O | 2.00231700 | 3.03588700 | 0.79376800 |
| O | 3.20228700 | 5.11449700 | 0.79376800 |
| B | 8.52630300 | 3.72373700 | 0.79376800 |
| O | 7.06842000 | 1.49697900 | 0.79376800 |

#### Transformation Matrix

|   |          |          |                          |
|---|----------|----------|--------------------------|
| a | 7.732466 | 0.000000 | 0.000000                 |
| b | 3.866233 | 6.696508 | 0.000000                 |
| c | 0.000000 | 0.000000 | 3.592001 AA              |
| c | 1.208490 | 0.697722 | 3.446160 inclined zigzag |

### Layer II AB stacking

|   |          |          |            |
|---|----------|----------|------------|
| O | 12.40106 | 7.346668 | 4.158838   |
| B | 9.734793 | 3.026100 | 4.158838   |
| B | 10.94334 | 5.119470 | 4.158838   |
| O | 9.734793 | 5.807320 | 4.158838   |
| B | 8.526233 | 5.119470 | 4.158838   |
| O | 8.534924 | 3.729150 | 4.158838   |
| B | 13.60103 | 8.049667 | 4.158838   |
| B | 7.077050 | 5.955908 | 4.158838   |
| O | 5.868550 | 5.268058 | 4.158838   |
| O | 7.068520 | 7.346668 | 4.158838   |
| B | 12.39254 | 5.955908 | 4.158838   |
| O | 10.93465 | 3.729150 | 4.158838   |
| c | 0.00000  | 0.00000  | 6.73014 AB |

### Layer II serrated zigzag

|   |          |          |          |
|---|----------|----------|----------|
| O | 9.743313 | 5.812217 | 4.285588 |
| B | 7.077050 | 1.491659 | 4.285588 |
| B | 8.285600 | 3.585029 | 4.285588 |
| O | 7.077050 | 4.272869 | 4.285588 |
| B | 5.868490 | 3.585029 | 4.285588 |
| O | 5.877180 | 2.194699 | 4.285588 |

|   |          |          |          |                 |
|---|----------|----------|----------|-----------------|
| B | 10.94328 | 6.515227 | 4.285588 |                 |
| B | 4.419297 | 4.421457 | 4.285588 |                 |
| O | 3.210807 | 3.733607 | 4.285588 |                 |
| O | 4.410777 | 5.812217 | 4.285588 |                 |
| B | 9.734793 | 4.421457 | 4.285588 |                 |
| O | 8.276910 | 2.194699 | 4.285588 |                 |
| c | 0.000000 | 0.000000 | 6.98364  | serrated zigzag |

## REF-II

### Layer I AA, AB, inclined armchair, and serrated armchair

|   |           |           |          |   |           |           |          |
|---|-----------|-----------|----------|---|-----------|-----------|----------|
| O | 15.328768 | 8.0298630 | 0.793768 | B | 15.243038 | 6.6372530 | 0.793768 |
| O | 16.974848 | 10.881153 | 0.793768 | O | 16.491958 | 6.0148430 | 0.793768 |
| C | 11.608732 | 2.9338220 | 0.793768 | C | 16.749358 | 8.3077030 | 0.793768 |
| C | 10.221312 | 2.9345120 | 0.793768 | C | 17.443178 | 7.1061530 | 0.793768 |
| C | 9.5268420 | 4.1387820 | 0.793768 | C | 4.3841160 | 7.1063330 | 0.793768 |
| C | 10.220672 | 5.3405120 | 0.793768 | C | 17.444578 | 9.5118230 | 0.793768 |
| C | 11.611122 | 5.3399020 | 0.793768 | C | 5.0784360 | 8.3079230 | 0.793768 |
| C | 12.304472 | 4.1378520 | 0.793768 | C | 18.832338 | 9.5120830 | 0.793768 |
| B | 10.913192 | 0.7940220 | 0.793768 | O | 5.3337660 | 6.0145530 | 0.793768 |
| O | 9.7503720 | 1.5653020 | 0.793768 | O | 6.4986960 | 8.0284530 | 0.793768 |
| O | 8.1061320 | 4.4158220 | 0.793768 | B | 6.5831160 | 6.6357230 | 0.793768 |
| B | 8.0199620 | 5.8084320 | 0.793768 | O | 19.301238 | 10.881833 | 0.793768 |
| O | 9.2685720 | 6.4313320 | 0.793768 | B | 18.137838 | 11.652123 | 0.793768 |
| O | 12.563232 | 6.4312020 | 0.793768 | O | 12.077002 | 1.5636820 | 0.793768 |
| B | 13.809412 | 5.8101220 | 0.793768 | O | 13.725892 | 4.4157220 | 0.793768 |

#### Transformation Matrix

|   |           |           |          |                   |
|---|-----------|-----------|----------|-------------------|
| a | 14.449272 | 0.000000  | 0.000000 |                   |
| b | 7.224636  | 12.513431 | 0.000000 |                   |
| c | 0.000000  | 0.000000  | 3.528001 | AA                |
| c | 1.389180  | 0.000000  | 3.487678 | inclined armchair |

### Layer II AB stacking

|   |          |          |          |    |          |          |          |
|---|----------|----------|----------|----|----------|----------|----------|
| O | 22.55340 | 12.20101 | 4.103020 | B  | 22.46767 | 10.80840 | 4.103020 |
| O | 24.19948 | 15.05230 | 4.103020 | O  | 23.71659 | 10.18599 | 4.103020 |
| C | 18.83337 | 7.104967 | 4.103020 | C  | 23.97399 | 12.47885 | 4.103020 |
| C | 17.44595 | 7.105658 | 4.103020 | C  | 24.66781 | 11.27730 | 4.103020 |
| C | 16.75148 | 8.309927 | 4.103020 | C  | 11.60875 | 11.27748 | 4.103020 |
| C | 17.44531 | 9.511658 | 4.103020 | C  | 24.66921 | 13.68297 | 4.103020 |
| C | 18.83576 | 9.511047 | 4.103020 | C  | 12.30307 | 12.47907 | 4.103020 |
| C | 19.52911 | 8.308998 | 4.103020 | C  | 26.05697 | 13.68323 | 4.103020 |
| B | 18.13783 | 4.965168 | 4.103020 | O  | 12.55840 | 10.18570 | 4.103020 |
| O | 16.97501 | 5.736447 | 4.103020 | O  | 13.72333 | 12.19960 | 4.103020 |
| O | 15.33077 | 8.586967 | 4.103020 | B  | 13.80775 | 10.80687 | 4.103020 |
| B | 15.24460 | 9.979578 | 4.103020 | O  | 26.52587 | 15.05298 | 4.103020 |
| O | 16.49321 | 10.60248 | 4.103020 | B  | 25.36247 | 15.82327 | 4.103020 |
| O | 19.78787 | 10.60235 | 4.103020 | O  | 19.30164 | 5.734828 | 4.103020 |
| B | 21.03405 | 9.981268 | 4.103020 | O  | 20.95053 | 8.586867 | 4.103020 |
| c | 0.00000  | 0.00000  | 6.618505 | AB |          |          |          |

### Layer II serrated armchair

|   |           |           |          |   |           |           |          |
|---|-----------|-----------|----------|---|-----------|-----------|----------|
| O | 16.717948 | 8.0298630 | 4.271908 | B | 16.632218 | 6.6372530 | 4.271908 |
| O | 18.364028 | 10.881153 | 4.271908 | O | 17.881138 | 6.0148430 | 4.271908 |

|   |           |           |          |                   |           |           |          |
|---|-----------|-----------|----------|-------------------|-----------|-----------|----------|
| C | 12.997912 | 2.9338220 | 4.271908 | C                 | 18.138538 | 8.3077030 | 4.271908 |
| C | 11.610492 | 2.9345120 | 4.271908 | C                 | 4.3830860 | 7.1061530 | 4.271908 |
| C | 10.916022 | 4.1387820 | 4.271908 | C                 | 5.7732960 | 7.1063330 | 4.271908 |
| C | 11.609842 | 5.3405120 | 4.271908 | C                 | 18.833758 | 9.5118230 | 4.271908 |
| C | 13.000302 | 5.3399020 | 4.271908 | C                 | 6.4676160 | 8.3079230 | 4.271908 |
| C | 13.693652 | 4.1378520 | 4.271908 | C                 | 5.7722460 | 9.5120830 | 4.271908 |
| B | 12.302372 | 0.7940220 | 4.271908 | O                 | 6.7229460 | 6.0145530 | 4.271908 |
| O | 11.139552 | 1.5653020 | 4.271908 | O                 | 7.8878760 | 8.0284530 | 4.271908 |
| O | 9.4953020 | 4.4158220 | 4.271908 | B                 | 7.9722960 | 6.6357230 | 4.271908 |
| B | 9.4091420 | 5.8084320 | 4.271908 | O                 | 20.690418 | 10.881833 | 4.271908 |
| O | 10.657752 | 6.4313320 | 4.271908 | B                 | 19.527018 | 11.652123 | 4.271908 |
| O | 13.952402 | 6.4312020 | 4.271908 | O                 | 13.466182 | 1.5636820 | 4.271908 |
| B | 15.198592 | 5.8101220 | 4.271908 | O                 | 15.115072 | 4.4157220 | 4.271908 |
| c | 0.00000   | 0.00000   | 6.95628  | serrated armchair |           |           |          |
