# Supplementary material for: On the reticular construction concept of covalent organic frameworks
Source: publisher site journal article supplement (doi:10.3762/bjnano.1.8), 2010-11-22
Supplement: Additional file 2 [file S2.pdf › S2.pdf]

## **Supporting Information**

for

### **On the reticular construction concept of covalent organic frameworks**

Binit Lukose<sup>1</sup>, Agnieszka Kuc<sup>1</sup>, Johannes Frenzel<sup>2</sup>, and Thomas Heine\*<sup>1</sup>

Address: <sup>1</sup>School of Engineering and Science, Jacobs University Bremen, Research III, Room 61, Campus Ring 1, Bremen 28759, Germany and <sup>2</sup>Lehrstuhl für Theoretische Chemie, Ruhr-Universität Bochum, Bochum 44780, Germany

Email: Thomas Heine - t.heine@jacobs-university.de

\* Corresponding author

### **CIFs for selected structures**

This ZIP file contains following crystallography information files (CIFs) of some of the studied

COF structures:

| <b>File name</b>      | <b>COF</b>                |
|-----------------------|---------------------------|
| COF-10_inc-z_1.cif :  | COF-10 inclined zigzag    |
| COF-1M_AA_1.cif:      | COF-1M AA                 |
| COF-1M_AB_1.cif:      | COF-1M AB                 |
| COF-1M_inc-z_1.cif:   | COF-1M inclined zigzag    |
| COF-1M_ser-z_1.cif:   | COF-1M serrated zigzag    |
| COF-8M_AA_1.cif:      | COF-8M AA                 |
| COF-8M_AB_1.cif:      | COF-8M AB                 |
| COF-8M_inc-a_1.cif:   | COF-8M inclined armchair  |
| COF-8M_inc-z_1.cif:   | COF-8M inclined zigzag    |
| COF-8M_ser-a_1.cif:   | COF-8M serrated armchair  |
| Ppy-COF_AB_1.cif:     | PPy-COF AB                |
| Ppy-COF_inc-z_1.cif:  | PPy-COF inclined zigzag   |
| Ppy-COF_ser-z_1.cif:  | PPy-COF serrated zigzag   |
| TPCOF-1M_inc-z_1.cif: | TP COF-1M inclined zigzag |
| TPCOF_inc-z_1.cif:    | TP COF inclined zigzag    |
